# Supplementary material
Source: PubMed Central journal article supplement (PMC5247556)
Supplement: NIHMS815505-supplement-supplement.pdf [file NIHMS815505-supplement-supplement.pdf]

Manuscript Number: ENVINT-D-14-01277R1

Title: Identification of fipronil metabolites by time-of-flight mass spectrometry for application in a human exposure study

Article Type: Research Paper

Keywords: Fipronil, LC/TOF, Biomarker, Human Exposure, Metabolism

Corresponding Author: Dr. Mark J. Strynar, Ph.D.

Corresponding Author's Institution: U.S. EPA/ORD/NERL

First Author: Rebecca L McMahan, MS

Order of Authors: Rebecca L McMahan, MS; Mark J. Strynar, Ph.D.; Sonia Dagnino, Ph.D; David W Herr, Ph.D; Virginia C Moser, Ph.D; Stavros Garantziotis, Ph.D; Erik M Andersen, MPH; Danielle L Freeborn; Larry McMillan, BS; Andrew B Lindstrom, Ph.D.

Abstract: Fipronil is a phenylpyrazole insecticide commonly used in residential and agricultural applications. To understand more about the potential risks for human exposure associated with fipronil, urine and serum from dosed Long Evans adult rats (5 and 10 mg/kg bw) were analyzed to identify metabolites as potential biomarkers for use in human biomonitoring studies. Urine from treated rats was found to contain seven unique metabolites, two of which had not been previously reported—M4 and M7 which were putatively identified as a nitroso compound and an imine, respectively. Fipronil sulfone was confirmed to be the primary metabolite in rat serum. The fipronil metabolites identified in the respective matrices were then evaluated in matched human urine (n=84) and serum (n=96) samples from volunteers with no known pesticide exposures. Although no fipronil or metabolites were detected in human urine, fipronil sulfone was present in the serum of approximately 25% of the individuals at concentrations ranging from 0.1-4 ng/mL. These results indicate that many fipronil metabolites are produced following exposures in rats and that fipronil sulfone is a useful biomarker in human serum. Furthermore, human exposure to fipronil may occur regularly and require more extensive characterization.

Dear Editor,

I would like to submit the manuscript entitled “Identification of fipronil metabolites by time-of-flight mass spectrometry for application in a human exposure study” for consideration for publication in *Environment International*. This study demonstrates how advanced time-of-flight mass spectrometry techniques can be used to more fully describe the metabolism of xenobiotic compounds in dosed-animal studies and how this knowledge can be applied in human biomonitoring investigations to make relevant conclusions about human exposures to emerging compounds of concern. The compound of interest in this study is fipronil, a commonly used insecticide that has led to concerns due to the associated effects in rodents which include thyroid disruption, endocrine disruption, and neurotoxic effects. There are many possible routes for human exposure to fipronil since it is used in many applications (veterinary, agricultural, and residential pest control) and has found to be a contaminant in soil, water, and house dust. The results presented within the manuscript describe the approach for the identification of potential biomarkers of exposure to fipronil using dosed rodents, including two new metabolites, and provide the first report on human biomarker measurements in the general population. I believe that the content of the manuscript would fit well into the scope of your journal. Suggested external reviewers include:

1. Paul Lioy, Ph.D. Professor and Vice Chair Department of Environmental Medicine

UMDNJ - Robert Wood Johnson Medical School

Email: [plioy@eohsi.rutgers.edu](mailto:plioy@eohsi.rutgers.edu)

Phone: 732-445-0155

2. Antonia Calafat, Ph.D. Distinguished Consultant at Center for Disease Control (CDC)

Email: [Antonia.calafat@cdc.hhs.gov](mailto:Antonia.calafat@cdc.hhs.gov)

Phone: 770-488-7891

3. Dana Boyd Barr, Ph.D. Research Professor Rollins School of Public Health Emory University

Email: [dbbarr@emory.edu](mailto:dbbarr@emory.edu)

Phone: 404-727-9605

Correspondence regarding this article can be sent to Dr. Mark Strynar<sup>b</sup>, whose contact information is listed below. Other authors include Rebecca McMahan<sup>a</sup> ([mcmahan.rebecca@epa.gov](mailto:mcmahan.rebecca@epa.gov) (919)541-1071), Sonia Dagnino<sup>a</sup> ([Dagnino.sonia@gmail.com](mailto:Dagnino.sonia@gmail.com)),

David Herr<sup>c</sup> (herr.david@epa.gov (919)541-0380), Virginia Moser<sup>c</sup> (moser.ginger@epa.gov (919)541-5075), Stavros Garantziotis<sup>d</sup> (garantziotis@niehs.nih.gov), Erik Andersen<sup>b</sup> (eandarse4@gmail.com), Danielle Lyke<sup>c</sup> (lyke.danielle@epa.gov (919)541-4339), Larry McMillan<sup>e</sup> (mcmillan.larry-rtp@epa.gov (919)541-5657), and Andy Lindstrom<sup>b</sup> (lindstrom.andrew@epa.gov (919)541-0551). I thank you for your consideration of this manuscript for publication.

Dr. Mark Stynar  
\*Strynar.mark@epa.gov  
(919)541-1071

<sup>a</sup>ORISE fellow at the United States Environmental Protection Agency, National Exposure Research Laboratory, Research Triangle Park, North Carolina

<sup>b</sup>United States Environmental Protection Agency, National Exposure Research Laboratory, Research Triangle Park, North Carolina

<sup>c</sup>National Health and Environmental Effects Research Lab, U.S. Environmental Protection Agency, Research Triangle Park, North Carolina

<sup>d</sup>National Institute for Environmental and Health Sciences, Research Triangle Park, North Carolina

<sup>e</sup>National Caucus and Center on Black Aged Employee, U.S. Environmental Protection Agency, National Exposure Research Laboratory, Research Triangle Park, North Carolina

1 Identification of fipronil metabolites by time-of-  
2 flight mass spectrometry for application in a human  
3 exposure study

4 *Rebecca L. McMahan<sup>a</sup>, Mark J. Strynar<sup>b\*</sup>, Sonia Dagnino<sup>a</sup>, David W. Herr<sup>c</sup>, Virginia C. Moser<sup>c</sup>,*  
5 *Stavros Garantziotis<sup>d</sup>, Erik M. Andersen<sup>b</sup>, Danielle F. Lyke<sup>c</sup>, Larry McMillan<sup>e</sup>, Andrew B.*  
6 *Lindstrom<sup>b</sup>*

7 <sup>a</sup>ORISE fellow at the United States Environmental Protection Agency, National Exposure  
8 Research Laboratory, Research Triangle Park, North Carolina

9 <sup>b</sup>United States Environmental Protection Agency, National Exposure Research Laboratory,  
10 Research Triangle Park, North Carolina

11 <sup>c</sup>National Health and Environmental Effects Research Lab, U.S. Environmental Protection  
12 Agency, Research Triangle Park, North Carolina

13 <sup>d</sup>National Institute for Environmental and Health Sciences, Research Triangle Park, North  
14 Carolina

15 <sup>e</sup>National Caucus and Center on Black Aged Employee, U.S. Environmental Protection Agency,  
16 National Exposure Research Laboratory, Research Triangle Park, North Carolina

17 \*CORRESPONDING AUTHOR:

18 Phone: (919)541-3706

19 Address: 109 TW Alexander Dr. Durham, NC 27705

20 Email: strynar.mark@epa.gov

21

22 ABSTRACT

23 Fipronil is a phenylpyrazole insecticide commonly used in residential and agricultural  
24 applications. To understand more about the potential risks associated with fipronil, dosed Long  
25 Evans rats were evaluated for metabolites to develop a set of biomarkers for use in human  
26 exposure studies. Urine from treated rats was found to contain seven unique metabolites, two of  
27 which had not been previously reported. Fipronil sulfone was confirmed to be the primary  
28 metabolite in rat serum. The fipronil metabolites identified in the respective matrices were then  
29 evaluated in matched human urine and serum samples from volunteers with no known pesticide  
30 exposures. Although no fipronil or metabolites were detected in human urine, fipronil sulfone  
31 was present in the serum of approximately 25% of the individuals at concentrations ranging from  
32 0.1-4 ng/mL. These results are comparable to results from an exposure study of workers in a  
33 fipronil production facility. These results indicate that many fipronil metabolites are produced  
34 following exposures in rats and that fipronil sulfone could be a useful biomarker in human  
35 serum. Furthermore, human exposure to fipronil may occur regularly and require more extensive  
36 characterization.

37

38 Keywords: Fipronil, LC/TOF, Biomarker, Human Exposure, Metabolism

39 ABBREVIATIONS

40 DI: Deionized

41 ESI: electrospray ionization

42 GABA: gamma-aminobutyric acid

43 HPLC: high performance liquid chromatography

44 LC: liquid chromatography

45 LOQ: limit of quantitation

46 MS: mass spectrometry

47 NIEHS: National Institute for Environmental Health Sciences

48 QC: quality control

49 Q-TOF: quadrupole time-of-flight

50 % RSD: Percent Relative Standard Deviation

51 SPE: solid phase extraction

52 TOF: time-of-flight

53 UPLC: ultra performance liquid chromatography

54 US EPA: United States Environmental Protection Agency

55 WWTP: waste water treatment plant

56

57 1. INTRODUCTION

58 Fipronil (Figure 1) is a phenylpyrazole broad-spectrum insecticide that is registered for use in  
59 residential settings including ant baits and gels, cockroach baits and gels, and termite control  
60 products; veterinary applications such as spot treatment flea and tick control products for dogs  
61 and cats; ornamental turf applications such as fire ant control; and agricultural applications such  
62 as pest control on potato crops<sup>1</sup>. When initially produced, fipronil was the first insecticide to act

63 by targeting the gamma-aminobutyric acid (GABA) receptor and has favorable selective toxicity  
64 towards insects rather than mammals<sup>2-4</sup>.

65 A 1997 report indicated that 480 tons of fipronil were produced per year by Rhone Poulenc,<sup>5</sup>  
66 and between 1998 and 2008 it was reported that usage averaged 150,000 pounds of active  
67 ingredient per 1.5 million acres<sup>1</sup>. Widespread fipronil use has led to contamination of water and  
68 soil (1-158 ng/L of parent or environmental degradate) in several states including, but not limited  
69 to Alabama, Georgia, California, Louisiana, and Indiana<sup>6, 7</sup>. Perhaps as a result of this  
70 contamination, fipronil has been implicated as one of the chemicals associated with the colony  
71 bee collapse<sup>8</sup>.

72 Because little was found in the peer-reviewed literature about the disposition of fipronil,  
73 Cravedi et al. (2013) performed a thorough study on the metabolism, distribution, and  
74 elimination of fipronil in rats that showed fipronil is primarily converted to fipronil sulfone (M1  
75 Figure 1), a metabolite which was stored mainly in adipose tissue and adrenals<sup>9</sup>. Fipronil's  
76 association with thyroid disruption<sup>10</sup>, endocrine disruption<sup>11</sup>, and neurotoxic effects<sup>12</sup> in rats has  
77 also led to a growing concern about the potential for human health effects in the last decade.

78 The effects of acute human exposure to fipronil include headache, dizziness, vomiting, and  
79 seizures<sup>9, 10</sup>. Information on the effects of chronic exposure is limited, but the US EPA has  
80 classified fipronil as a possible human carcinogen based on data that shows an increase of  
81 thyroid follicular cell tumors in both sexes of the rat<sup>13</sup>. Vidau et al. (2011) also concluded that  
82 fipronil has the potential to cause apoptosis by uncoupling oxidative phosphorylation at  
83 relatively low concentrations (5-10  $\mu$ M) in human cell lines<sup>14</sup>. A case of acute human self-  
84 poisoning with fipronil has demonstrated that fipronil levels can remain elevated in serum for  
85 days after exposure, and that fipronil sulfone was the primary metabolite<sup>15</sup>. A previous study also

86 showed that fipronil sulfone is the predominant metabolite in human liver microsomes via  
87 cytochrome P-450 oxidation<sup>16</sup>. Very little is known about human exposure to fipronil in the  
88 general population. One occupational exposure study of workers at a fipronil production facility  
89 reports a mean fipronil sulfone serum level of 7.79 ng/mL<sup>17</sup>.

90 There is little published on fipronil in humans<sup>14, 15, 17</sup> and no data from the general population.  
91 This may be because human samples can be difficult to obtain and analyze. They often have  
92 significant matrix effects due to high concentrations of endogenous chemicals, making the  
93 identification of metabolites difficult. Therefore, we used a unique workflow where dosed animal  
94 samples were used to develop a set of potential serum/urine biomarkers using time-of-flight mass  
95 spectrometry. Serum and urine samples from human subjects with no known exposures were  
96 then analyzed via targeted screening for the putative fipronil biomarkers to characterize fipronil  
97 exposure in humans from the general population.

## 98 2. MATERIALS AND METHODS

99 **Chemicals.** Unlabeled fipronil (5-amino-1-[2,6-dichloro-4-(trifluoromethyl)-phenyl]-4-  
100 (trifluoromethylsulfinyl)-1-*H*-pyrazole-3-carbonitrile, >99%) and its metabolites: fipronil  
101 sulfone (5-amino-1-[2,6-dichloro-4-(trifluoromethyl)-phenyl]-4-[(trifluoromethyl)sulfonyl]-1-*H*-  
102 pyrazole-3-carbonitrile, >99%), fipronil sulfide (5-amino-1-[2,6-dichloro-4-(trifluoromethyl)-  
103 phenyl]-4-[(trifluoromethyl)thio]-1-*H*-pyrazole-3-carbonitrile, 98%), fipronil amide (5-amino-1-  
104 [2,6-dichloro-4-(trifluoromethyl)-phenyl]-4-[(trifluoromethyl)thio]-1-*H*-pyrazole-3-carboxamide,  
105 >99%), and monochloro fipronil (5-amino-1-[2-chloro-4-(trifluoromethyl)-phenyl]-4-  
106 [(trifluoromethyl)sulfinyl]-1-*H*-pyrazole-3-carbonitrile, >97%) were procured as solid analytical  
107 standards from the pesticide repository through the US EPA (Fort Meade, MD, USA). These five  
108 analytical standards were prepared as a mixture in acetonitrile and used for all subsequent



109 matrix-matched standard curves. The internal standard fipronil des-F<sub>3</sub> (see supporting  
110 information for structure) (5-amino-1-[2,6-dichloro-4-(trifluoromethyl)-phenyl]-4-  
111 (methylsulfinyl)-1-H-pyrazole-3-carbonitrile, 99%, 0.1 ng/uL in Acetonitrile) was ordered from  
112 Crescent Chemical Company (Islandia, NY, USA).

113 Acetonitrile and methanol (B&J Brand HighPurity Solvent) were purchased from Honeywell  
114 Burdick & Jackson (Muskegon, MI,USA) and ammonium acetate from Sigma Aldrich (St.  
115 Louis, MO, USA). Deionized water was generated in house from a Barnsted Easypure UV/UF  
116 (Dubuque, IA, USA) coupled with activated charcoal and ion exchange resin canisters.

117

118 **2.1 Animals.** This study was part of an investigation of the neurotoxic effects of fipronil in  
119 rodents<sup>18, 19</sup>. The animal facility is accredited by the American Association for Accreditation of  
120 Laboratory Animal Care International, and all protocols were approved by the National Health  
121 and Environmental Effects Research Laboratory Institutional Animal Care and Use Committee at  
122 the United States Environmental Protection Agency. Male Long Evans rats (60-90 days old)  
123 were acquired from Charles River Laboratories (Wilmington, MA). Animal husbandry details  
124 are provided in the Supporting Information. Animals were dosed repeatedly by oral gavage at  
125 either 5 (low dose) or 10 (high dose) mg/kg with fipronil suspended in corn oil (1 mL/kg) every  
126 24 hours for two weeks. Control rats were gavaged with corn oil only. Six hours after the 14<sup>th</sup>  
127 dose, rats were euthanized. Trunk blood was collected in tubes without anticoagulant and stored  
128 on ice for 1-1.5 h.. The samples were centrifuged at 1300 × g for 30 min. at 4° C. The serum was  
129 collected, frozen on dry ice, and stored at -80 °C until analysis. Urine was collected in a syringe  
130 either from voids on a clean table or via bladder puncture and transferred to a micro-centrifuge  
131 tube, immediately frozen on dry ice, and stored at -80 °C until analysis.

132 **2.2 Human Samples.** Matched human urine ( $n=84$ ) and serum ( $n=96$ ) samples, from  
 133 individuals with no known fipronil exposure, were collected by the National Institute for  
 134 Environmental and Health Sciences (NIEHS protocol number 10-E-0063) between April and  
 135 June 2011. The human samples were simply a sample of convenience and were not meant to be  
 136 representative of a specific population. The urine collected was a spot sample and was not  
 137 concentrated or representative of a specific sampling period. Volunteers were anonymous, and  
 138 no personally identifiable information was provided. The samples were from male and female  
 139 volunteers of various ethnicities between 19 and 73 years of age who live in the Raleigh-Durham  
 140 area of North Carolina (Table 1). Although 100 volunteers participated in the study, several urine  
 141 and serum samples were not included due to an insufficient volume for analysis.

142 **Table 1.** Human demographic data.  
 143

|       | Sex  |        | Age   |       |       |       | Race  |       |       |       |
|-------|------|--------|-------|-------|-------|-------|-------|-------|-------|-------|
|       | Male | Female | 19-33 | 34-48 | 48-62 | 62-76 | Asian | Black | White | Other |
| 144 % | 30   | 70     | 29    | 30    | 33    | 8     | 3     | 32    | 63    | 2     |

145  
 146  
 147 **2.3 Extraction Protocols.** Samples were extracted in a manner that optimized recovery and  
 148 reproducibility while reducing matrix interference. Animal samples were small volumes that did  
 149 not require solid phase extraction (SPE). However, a protocol involving SPE was performed with  
 150 the human samples to reduce matrix interference. Sample extraction protocols for biologicals are  
 151 described below. More information on methods development for human samples can be found in  
 152 the Supporting Information. Rat serum samples were first analyzed by liquid  
 153 chromatography/time-of-flight mass spectrometer (LC/TOF-MS) in order to identify any  
 154 metabolites. Human samples were then analyzed by liquid chromatography/triple-quadrupole  
 155 mass spectrometer (LC/triple-quad) for quantification of metabolites for which analytical

156 standards were possessed. LC/Q-TOF was used for structure elucidation of unknown  
157 metabolites.

158 **2.4 Rat serum.** Rat serum (25  $\mu$ L) was denatured with 100  $\mu$ L of 0.1 M formic acid and  
159 precipitated with 1 mL of a cold acetonitrile solution spiked with the internal standard (fipronil  
160 des-F<sub>3</sub>, 25 ng). The sample was then centrifuged for 5 minutes at 12500  $\times$  g. An aliquot of the  
161 supernatant was mixed 50:50 with 10 mM ammonium acetate buffer, and analyzed via LC/TOF  
162 and LC/triple-quad.  $n=9$  for high dose (10 mg/kg/day) ;  $n=10$  for low dose (5 mg/kg/day); and  
163  $n=11$  for control animals, which were treated with vehicle. Quantitation was performed for  
164 fipronil and fipronil sulfone. The results of the quantitation are shown in the supporting  
165 information.

166 **2.5 Rat urine.** Rat urine (100  $\mu$ L) was precipitated with 900  $\mu$ L of cold acetonitrile and  
167 centrifuged for 8 minutes at 12500  $\times$  g. An aliquot of the supernatant was extracted and mixed  
168 50:50 with 10 mM ammonium acetate buffer before LC/MS analysis.  $n=3$  for high dose (10  
169 mg/kg/day);  $n=4$  for low dose (5 mg/kg/day); and  $n=3$  for control animals. Quantitation was only  
170 performed for the fipronil sulfone metabolite, as standards were not available for other  
171 metabolites. Quantitation specifics can be found in the Supporting Information. Fipronil sulfone  
172 concentrations in rat urine were used to approximate the relative concentrations of the other  
173 observed metabolites.

174 **2.6 Human serum.** Human serum (200  $\mu$ L) was denatured with 20  $\mu$ L of a 0.1 M formic acid  
175 solution spiked with internal standard (fipronil des-F<sub>3</sub>, 5 ng) and precipitated with 2 mL of cold  
176 acetonitrile. The sample was centrifuged for 10 minutes at 12500  $\times$  g and concentrated using  
177 solid phase extraction (SPE) using an Oasis 3cc HLB cartridge (Waters Corporation, Milford,  
178 MA) SPE cartridges were conditioned with 3 mL of methanol and 3 mL of ultrapure water,

179 samples were loaded, washed with 3 mL of 95:5 water/acetonitrile solution, then eluted with 3  
180 mL of acetonitrile. The eluate was evaporated under N<sub>2</sub> at 40° C until approximately 200 µL  
181 remained. The concentrated solution was mixed 50:50 with 10 mM ammonium acetate buffer  
182 and analyzed via LC/TOF and LC/triple-quad (*n*=96). In order to determine the concentration of  
183 compounds of interest, a seven-point matrix-matched (blank calf serum-Life Technologies-  
184 Gibco®, Grand Island, NY) extracted standard curve from 0.1-50 ng/mL, along with a method  
185 blank (DI water) and a matrix blank was run with the human serum samples. The lowest value on  
186 the standard curve (0.1 ng/mL) was considered the lower limit of quantitation (LLOQ).

187 **2.7 Human urine.** Human urine (5-12 mL) was precipitated with 1 mL of acetonitrile and  
188 concentrated using the SPE method described above with an Oasis 6cc HLB cartridge with the  
189 exception that cartridges were conditioned with 5 mL of methanol and 5 mL of ultrapure water,  
190 samples were loaded, washed with 5 mL of 95:5 water/acetonitrile solution, then eluted with 5  
191 mL of acetonitrile. The eluate was evaporated under N<sub>2</sub> at 40° C until approximately 1 mL  
192 remained. The concentrated solution was mixed 50:50 with 10 mM ammonium acetate buffer in  
193 an LC vial and analyzed by LC-TOF/MS (*n*=84). Note that several urine samples were excluded  
194 due to insufficient volume.

195 **2.8 Analytical Instrumentation.** Targeted analyses (LC/triple-quad) were carried out using an  
196 Agilent 1100 HPLC (Agilent Technologies, Palo Alto, CA) interfaced with a Sciex 3000 triple  
197 quadrupole mass spectrometer (Applied Biosystems/MDS Sciex, Foster City, CA) fitted with an  
198 electrospray ionization source (ESI) operated in the negative ionization mode. Compounds  
199 contained in the LC/triple-quad method (fipronil, fipronil sulfone, fipronil sulfide, fipronil  
200 amide, and monochloro fipronil) were optimized on a compound specific basis. Information  
201 regarding transitions are included in the Supporting Information.

202 The HPLC system consisted of a Phenomenex Luna C18 column (50 x 3 mm, 5  $\mu$ m; Torrance,  
203 CA, USA) with a Security-guard guard column (Phenomenex). The method consisted of the  
204 following: 0.4 mL/min flow rate which increased to 0.75 mL/min at time=2 min; temperature: 30  
205  $^{\circ}$ C; mobile phases – A: ammonium acetate buffer (0.2 mM) and DI water:methanol (95:5, v/v),  
206 and B: ammonium acetate buffer (0.2 mM) and acetonitrile:DI water (95:5, v/v); gradient: 0-2  
207 min 50% A and 50% B; 2.1-4 min, a linear gradient from 50:50 A:B to 10:90 A:B; 4-6 min 10%  
208 A and 90% B; 6.1-10 min re-equilibration to 50% A and 50% B.

209 Non-targeted analyses (LC/TOF) were carried out using an Agilent 1100 HPLC (Agilent  
210 Technologies, Palo Alto, CA) interfaced with an Agilent 6210 Time-of-Flight (TOF) mass  
211 spectrometer fitted with an electrospray ionization source operated in the negative ionization  
212 mode at 120 Volts. Any drift in the mass accuracy of the TOF was continuously corrected by  
213 infusion of two reference compounds (purine [ $m/z = 119.0363$ ] and hexakis (1H, 1H, 3H-  
214 tetrafluoropropoxy) phosphazene [ $m/z = 966.0007$ ]) via dual-ESI sprayer.

215 The HPLC method consisted of a Zorbax Eclipse Plus C18 column (2.1  $\times$  50 mm, 3.5  $\mu$ m;  
216 Agilent Technologies, Palo Alto, CA) fitted with a Phenomenex guard column (Torrance, CA).  
217 The method consisted of the following: 0.2 mL/min flow rate; at 30  $^{\circ}$ C; mobile phases: A:  
218 ammonium formate buffer (0.4 mM) and DI water:methanol (95:5 v/v), and B: ammonium  
219 formate (0.4 mM) and methanol:DI water (95:5 v/v); gradient: 0-5 min a linear gradient from  
220 50:50 A:B to 100% B; 5-15 min, 100% B; 15-18 min re-equilibration to 50% A and 50% B.

221 **2.9 Identification of Spectral Features.** The TOF-MS system has proprietary software that  
222 can be used in non-targeted analyses to help identify compounds that are specific to a treatment  
223 group or a specific experimental condition. For example, to identify potential biomarkers of  
224 fipronil exposure, control and dosed animal samples are analyzed, and molecular features

225 (identifiable peaks) were first extracted according to user specified criteria (e.g., minimum peak  
226 height, area count). The two groups of extracted features were then compared using The Mass  
227 Profiler software, which singles out only those compounds that are found in the dosed group.  
228 This collection of compounds can be thought to represent either the parent compound,  
229 metabolites of the parent, or specific biological responses that are attributable to the treatment  
230 administered.

231 The exact monoisotopic mass of each of these "treatment only" features was then used to  
232 generate a ranked list of possible chemical formulae for each unknown. The numerical ranking  
233 is based on the difference between the calculated and measured mass, the isotopic abundance and  
234 the isotope spacing. If authentic standards are available, the identity of a proposed feature can be  
235 confirmed using chromatographic retention time, exact monoisotopic mass, and isotopic  
236 distribution.

237 Fipronil is an interesting and somewhat unique compound because it contains six fluorine  
238 atoms and two chlorine atoms, that result in a significant negative mass defect (435.93869 Da,  
239 with the [M-H]<sup>-</sup> ion seen in negative ionization mode being 434.9314 *m/z*) which is preserved in  
240 most of its metabolic products to the extent that the F and Cl atoms are retained<sup>20</sup>. Moreover, the  
241 isotopic spacing between the Cl isotopes (<sup>35</sup>Cl [75.77%] and <sup>37</sup>Cl [24.23%]) leads to a distinctive  
242 isotopic pattern that aids greatly with identification (SI Figure 2). Both of these characteristics  
243 were useful in identifying fipronil-related metabolites.

244 Metabolites that were identified using the LC/TOF instrument described above were then  
245 investigated further using an Agilent 1200 HPLC system fitted with a 6250 quadrupole time-of-  
246 flight mass spectrometer (Q-TOF) (Agilent Technologies, Palo Alto, CA) using the same LC

247 conditions as previously described. The LC/Q-TOF allowed fragmentation at various collision  
248 energies of metabolites of interest which helped with structure elucidation.

249 **2.10 Quality Assurance/Control.** For each analysis, method and matrix blanks were  
250 evaluated for contamination or background levels of the compounds of interest. Three randomly  
251 chosen samples were replicated in each quantitative experiment to ensure consistency within the  
252 data sets. Parent-daughter ratios should be consistent, and ratio monitoring is a robust way to  
253 confirm the presence of a specific compound. Therefore, in the targeted screening of samples,  
254 the ratio between the primary and secondary parent-daughter transition was monitored to confirm  
255 the presence of each compound in the MS method. High and low concentration quality control  
256 (QC) samples containing the fipronil mixture of five analytical standards described in the  
257 *Chemicals* section were run with each batch of human serum samples. These samples were  
258 included to ensure analytical precision and accuracy.

259 **2.11 Statistics.** GraphPad Prism version 6.0 was used for statistical analyses of the fipronil  
260 sulfone concentrations in human serum with respect to race, age, and gender. Normality was  
261 tested using the Shapiro-Wilk normality test. Values were not normally distributed; therefore, we  
262 used nonparametric statistics (Mann-Whitney test for comparison of ranks, and Spearman  
263 correlation analysis) for all analyses. Statistics for gender and race differences were based on a  
264 non-detect/detect designation of “0” and “1”, respectively. Values that were below the LOQ  
265 (below the lowest curve point) were replaced with LOQ/2 for the Spearman Correlation analysis.  
266 All tests were carried out at the 95% confidence level.

## 267 3. RESULTS

268 **3.1 Quality Assurance/Control.** All lab prepared target and non-target analysis blanks and  
269 control samples were below the LLOQ for compounds of interest in all experiments. All

270 replicates for all experiments had a mean standard error of <15% for all replicates and ensured  
271 reliable data. For all targeted analyses, the ion ratios between the primary and secondary parent-  
272 daughter transitions were consistent for all standard compounds (mean  $\pm$  20%) and confirmed  
273 analytical precision. All QC samples (high and low) were 100%  $\pm$  15% of the nominal values.

274 **3.2 Urine from Treated Rodents.** The urine from rodents treated for 14 days with fipronil  
275 was analyzed for biomarkers of exposure via non-targeted analysis. As described above,  
276 molecular features (significant chromatographic peaks) were extracted from analytical runs of  
277 both dosed and control animals, and The Mass Profiler software was used to isolate those  
278 features that were unique to the dosed animals. The most plausible candidate biomarkers were  
279 those compounds with the signature isotope pattern of two chlorine atoms (SI Figure 2) and/or  
280 significant negative mass defects indicative of fluorine and chlorine atoms. Seven high  
281 abundance peaks fitting these criteria were identified, and the exact monoisotopic mass of each  
282 was used to generate a ranked list of plausible formulae and corresponding structures. We  
283 ultimately assigned tentative compound identity according to known metabolic pathways (e.g.,  
284 oxidation, sulfation, glucuronidation), the retention of negative mass defect and/or the isotopic  
285 pattern associated with chlorine, and consistency with results from previous studies. Information  
286 on the seven metabolites can be found in Table 2. Four of the compounds (M1, M2, M3, M5, and  
287 M6) were identified in previous studies<sup>9, 21</sup>, whereas two more (M4 and M7) are reported for the  
288 first time in this study (Figure 1). It should be noted that the spectral feature observed for the  
289 glucuronide conjugate (M6) splits into two chromatographic peaks, most likely meaning that the  
290 glucuronide molecule adds to both the oxygen and the nitrogen atom (see Figure 1). We were  
291 unable to differentiate which peak corresponded to which structure, but one was formed  
292 preferentially. However, this spectral feature is not observed for the sulfate conjugate (M5).



293 To better characterize the structures of metabolites M4 and M7, the fragmentation patterns of  
 294 the parent metabolites were analyzed via LC/Q-TOF. No useful information was gained about  
 295 metabolite M4; however, the fragmentation pattern of metabolite M7 helped to predict a  
 296 plausible structure. M7 structural information could be gleaned from looking at the exact masses  
 297 of molecular fragments originating from the parent molecule. For example, if the mass of a CO<sub>2</sub>  
 298 group is observed in the fragmentation pattern, it can be assumed that the molecule likely  
 299 contained a carboxylic acid. Spectral information regarding this fragmentation pattern can be  
 300 found in the Supporting Information (SI Figure 3).

301 Fipronil sulfone (M1) was confirmed by an authentic standard that has the same retention time,  
 302 monoisotopic mass, ion fragmentation pattern, and isotope spacing. Rats in the 5 mg/kg/day  
 303 dose-group had median concentrations of fipronil sulfone of 25.4 ( $\pm$  18.7) ng/mL, while the 10  
 304 mg/kg/day group had 31.9 ( $\pm$  13.2) ng/mL (SI Figure 1). If the fipronil sulfone concentrations are  
 305 used to generate estimated relative response factors for other metabolites that do not have  
 306 standards (assuming that all respond similarly within the TOF-MS), we estimate the relative  
 307 concentrations of fipronil metabolites in dosed-rodent urine to be  
 308 M6>M4>M5>M3>M7>M1>M2. The estimated concentrations of M2 and M6 are 30 and 2,000  
 309 ng/mL respectively.

310 **Table 2.** LC/TOF characteristics of putative metabolites in rat urine.

| Metabolite            | Retention Time (mins) | Predicted Formula of parent                                                                   | Score of Predicted Formula | [M-H] <sup>+</sup> Measured Mass (m/z) | [M-H] <sup>+</sup> Calculated Mass (m/z) | $\Delta$ ppm | Monoisotopic Mass (m/z) |
|-----------------------|-----------------------|-----------------------------------------------------------------------------------------------|----------------------------|----------------------------------------|------------------------------------------|--------------|-------------------------|
| M1 (Fipronil Sulfone) | 7.57                  | C <sub>12</sub> H <sub>4</sub> Cl <sub>2</sub> F <sub>6</sub> N <sub>4</sub> O <sub>2</sub> S | 99.63                      | 450.9266                               | 450.9263                                 | 0.67         | 451.9336                |
| M2                    | 7.3                   | C <sub>9</sub> H <sub>4</sub> Cl <sub>2</sub> F <sub>3</sub> N <sub>3</sub>                   | 93.50                      | 279.9665                               | 279.9662                                 | 1.07         | 280.9734                |
| M3                    | 1.62                  | C <sub>11</sub> H <sub>4</sub> O <sub>2</sub> N <sub>4</sub> Cl <sub>2</sub> F <sub>3</sub>   | 99.53                      | 350.9667                               | 350.9669                                 | 0.43         | 351.9742                |
| M4                    | 5.38                  | C <sub>10</sub> H <sub>4</sub> Cl <sub>2</sub> F <sub>3</sub> N <sub>3</sub> O <sub>2</sub>   | 98.63                      | 323.9565                               | 323.9560                                 | 1.54         | 324.9633                |
| M5                    | 1.4                   | C <sub>11</sub> H <sub>5</sub> Cl <sub>2</sub> F <sub>3</sub> N <sub>4</sub> O <sub>4</sub> S | 99.38                      | 414.9290                               | 414.9288                                 | 0.48         | 415.9361                |
| M6                    | 1.39                  | C <sub>17</sub> H <sub>13</sub> Cl <sub>2</sub> F <sub>3</sub> N <sub>4</sub> O <sub>7</sub>  | 98.74                      | 511.0036                               | 511.0041                                 | 0.98         | 512.0113                |
| M7                    | 5.38                  | C <sub>11</sub> H <sub>3</sub> Cl <sub>2</sub> F <sub>3</sub> N <sub>4</sub> O                | 98.93                      | 332.9564                               | 332.9563                                 | 0.30         | 333.9563                |

311

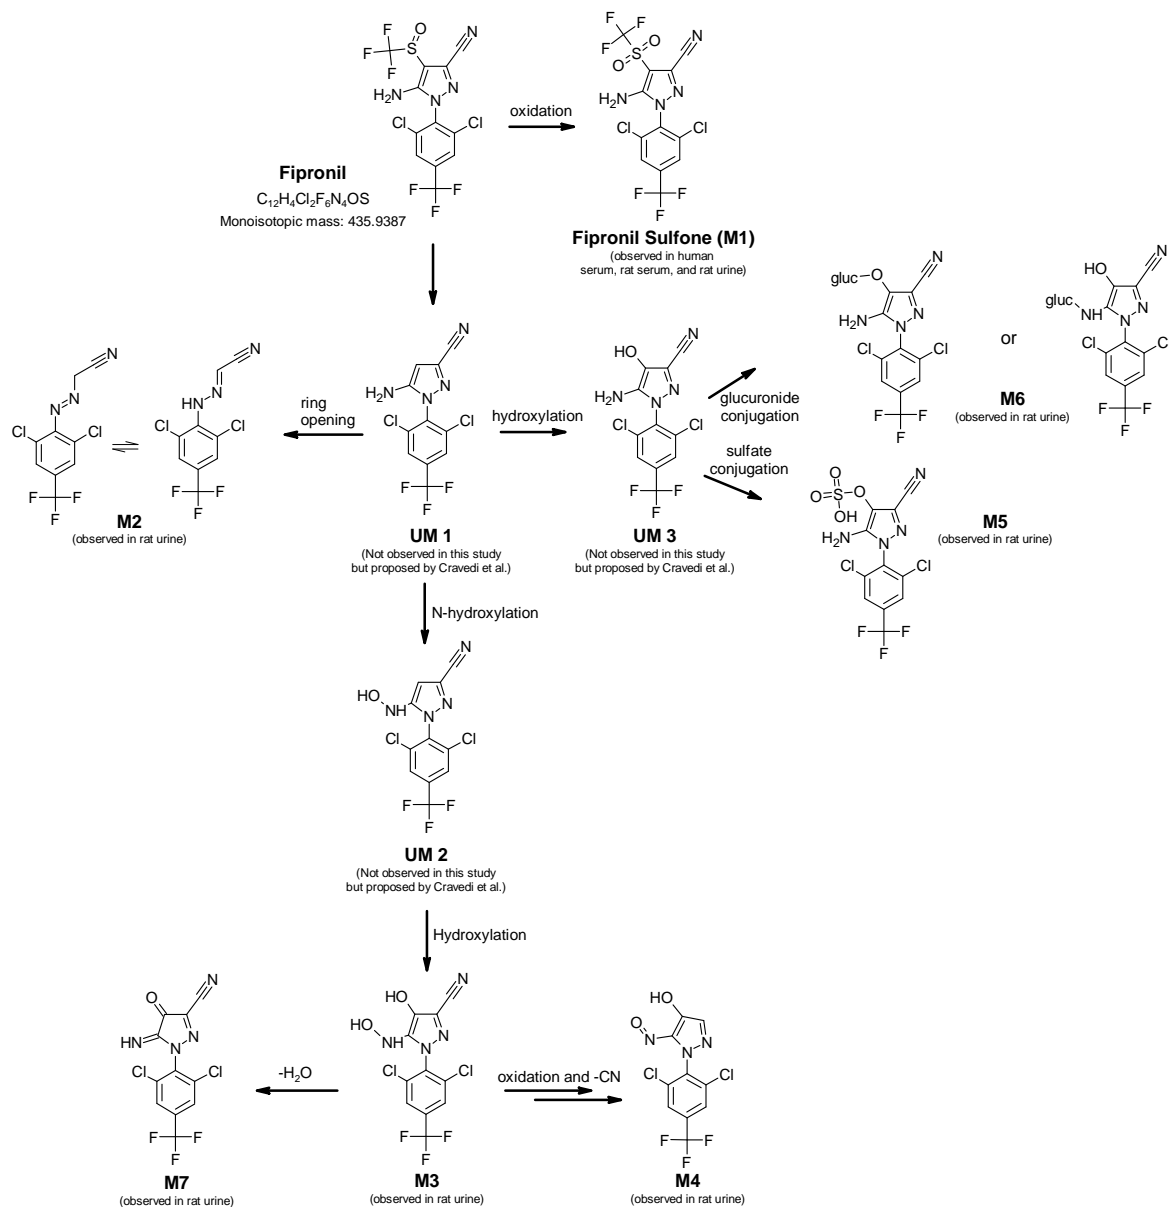

313

314

315 **Figure 1.** Proposed metabolic pathway of fipronil in the rat. M4 and M7 are proposed structures

316 based on MS data, isotope distributions, and exact mass. M1, M2, M3, M5, and M6 were

317 identified in rat urine. Unobserved metabolites labeled (UM) were not identified but are likely

318 intermediates.

319

320 **3.3 Serum from treated rodents.** The serum from treated rats was analyzed for all suspected  
321 biological metabolites via LC-TOF to evaluate the presence of possible serum biomarkers. In our  
322 analysis we detected no additional metabolites other than small amounts of un-metabolized  
323 fipronil and fipronil sulfone which had been previously identified by several groups <sup>4, 22</sup>.  
324 Quantitative data for fipronil and fipronil sulfone in rat serum can be found in the Supporting  
325 Information.

326 **3.4 Human urine.** Urine samples from 100 volunteer North Carolina residents with no known  
327 exposures to fipronil or other pesticides were examined for M1-M7 (identified in rodent urine)  
328 and for all other plausible fipronil adducts or derivatives using the methods described above. No  
329 parent fipronil or any plausible metabolites were found in the human urine samples.

330 **3.5 Human serum.** Matched human serum samples were analyzed for the metabolites  
331 observed in rat serum (fipronil and fipronil sulfone) by a targeted approach (LC/triple-quad,  
332 LOQ = 0.1 ng/mL). Only trace amounts of the parent fipronil were found in the human blood  
333 samples. However, fipronil sulfone (the putative biomarker identified in the rodent study) was  
334 detected in approximately 25% of the samples, at levels ranging from 0.1 to 4 ng/mL [mean =  
335 0.2 ( $\pm$ 0.6) ng/mL] (Figure 2).

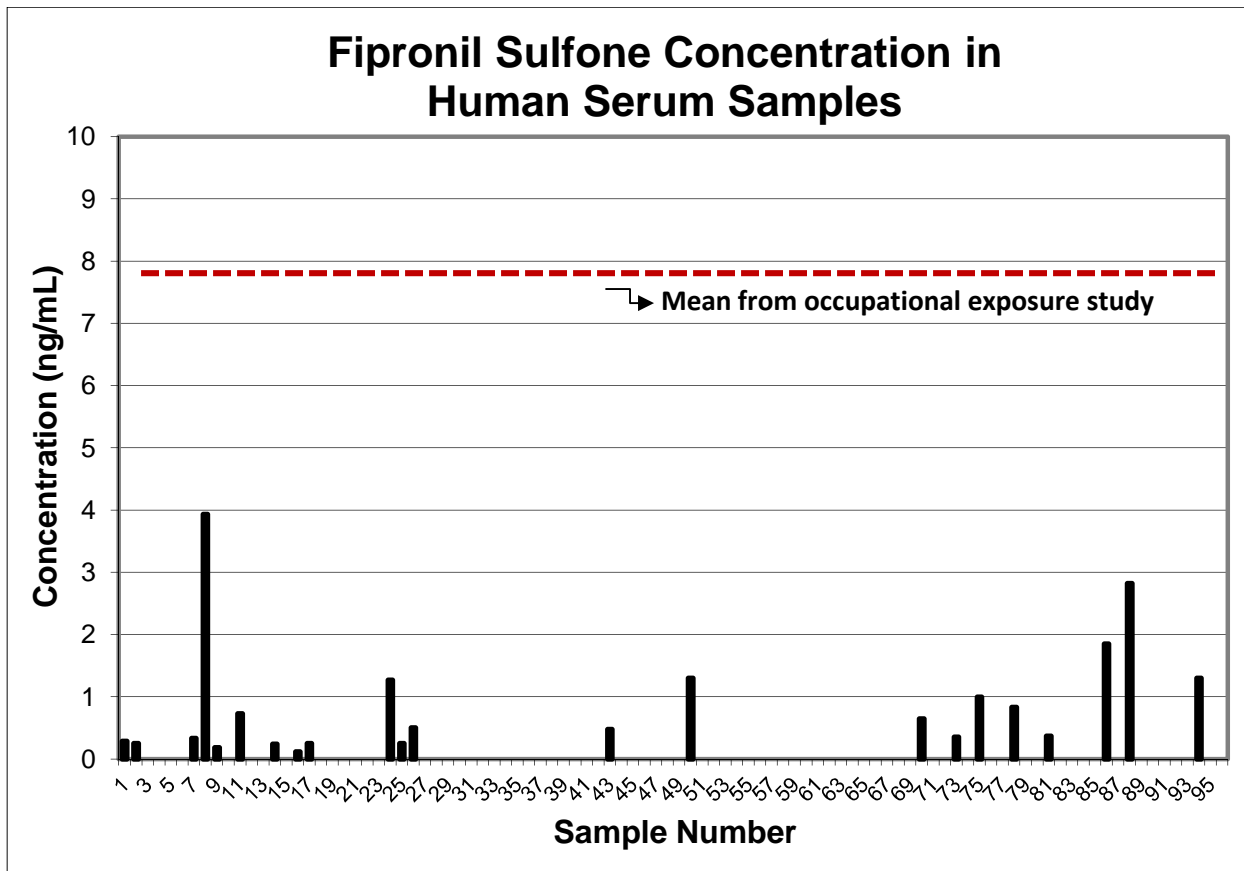

336  
 337 **Figure 2** shows fipronil sulfone concentrations in human serum\*. The red dotted line represents  
 338 the mean (7.79 ng/mL) observed in an occupational exposure study.

339 \*n = 96, four samples were excluded due to insufficient volume.

340  
 341 **3.6 Statistical Analyses.** Statistics (for the human serum data) showed that race and age may  
 342 have some impact on the level of fipronil sulfone in human serum. A slight positive correlation  
 343 was found for increasing age and fipronil sulfone level (Spearman  $r = 0.21$  and  $p = 0.042$ ).  
 344 Caucasians had median fipronil sulfone levels that were significantly higher than in African  
 345 Americans ( $p < 0.0001$  and Mann-Whitney  $U = 556$ ) (the Asian and “other” categories were  
 346 excluded from statistical analyses because there were too few samples). However, no significant  
 347 difference was found between males and females ( $p = 0.99$  and Mann-Whitney  $U = 959.5$ ).  
 348 Information regarding statistics can be found in the Supporting Information.

349

#### 350 4. DISCUSSION

351 This study demonstrates how advanced time-of-flight mass spectrometry techniques can be  
352 used to more fully describe the metabolism of xenobiotic compounds in treated-animal studies  
353 and how this knowledge can be applied in human biomonitoring studies to make relevant  
354 conclusions about human exposures to emerging compounds of concern. Our specific goal was  
355 to use the biomarkers identified from the dosed rodent work in the analysis of a set of human  
356 biological samples to characterize the rate of fipronil exposure in the general population.

357 In describing the metabolism of fipronil in rodents, our results were largely consistent with  
358 previous studies,<sup>9, 21, 23</sup> while also extending what is known about the basic metabolic process.  
359 Two novel metabolites observed in rat urine in this study which were not seen by Cravedi et al.  
360 (2013) can be attributed to differences in study design. Specifically, our Long Evans rats were  
361 dosed (5 or 10 mg/kg/day) for 14 days then sacrificed 6 hours after the last dose. In contrast,  
362 Cravedi et al. (2013) dosed acutely at 10 mg/kg and collected urine and serum every 24 h. over a  
363 72 h. period<sup>9</sup>. Differences between rat strain or length of dosing regimen may have made it  
364 possible to identify different products of fipronil metabolism, such as the pyrazole ring opened  
365 products or the highly oxidized heteroaromatic amine derivatives.

366 The proposed metabolic pathway in the rat and compound structures can be found in Figure 1.  
367 We propose that a new metabolite (M7) in rat urine, an imine, results from the loss of water from  
368 metabolite M3, which is a fipronil metabolite that is hydroxylated at both the carbon and the  
369 nitrogen. We also identified what is hypothesized to be nitroso compound (M4). We believe that  
370 M3 and M4 are formed from an unobserved hydroxyl amine intermediate (UM 2). The hydroxyl

371 amine (M3) has been identified in this and in previous studies<sup>9</sup>, but to our knowledge this is the  
372 first report of a nitroso metabolite of fipronil in rat urine. Although the structure for metabolite  
373 M4 is only putative, heterocyclic aromatic amines are known to undergo biological oxidation to  
374 form nitroso compounds. This process is mediated by cytochrome P-450 and NADPH<sup>24</sup>. Many  
375 heterocyclic amines are known carcinogens,<sup>25-29</sup> due to their ability to be hydroxylated and then  
376 form DNA adducts. The observation of N-hydroxylated fipronil metabolites in this and other  
377 rodent studies warrants further investigation of fipronil metabolism in humans and the resulting  
378 effects.

379 Noninvasive biomarkers like those present in urine, exhaled breath, hair, fingernails, etc. are  
380 optimal for use in human studies, and one intention of this study was to explore whether any of  
381 the urinary metabolites found in the rats could be used as biomarkers of exposure in humans.  
382 Studies with human liver microsomes have shown that fipronil is metabolized to fipronil sulfone  
383 *in vitro*, and Mohamed et al. (2004) have identified fipronil sulfone as a metabolite in humans  
384 acutely exposed to high doses<sup>15, 16</sup>. [ENREF 13](#) Aside from these, no publications comment on the  
385 disposition of fipronil in humans. In this study we analyzed human urine samples for any of the  
386 metabolites identified as possible biomarkers in rat urine. The absence of fipronil and its  
387 metabolites in the human urine samples was undoubtedly related to many factors. To start with,  
388 it is possible that most human elimination of these materials occurs via the feces, as is the case  
389 with rodents<sup>13, 23</sup>. Secondly, and perhaps more importantly, our study subjects were essentially  
390 volunteers from the Raleigh-Durham area of North Carolina with no known exposures to fipronil  
391 and/or any other similar pesticides. Identification of small amounts of unknown chemicals in  
392 urine from populations with no known exposure can be difficult due to the large amount of  
393 endogenous compounds found in the matrix. A more effective strategy would be to work with a

394 group of individuals with higher exposure levels (preferably occupationally) to determine human  
395 urinary metabolites. Despite negative findings with the human urine samples, 25% of the serum  
396 samples contained measureable amounts of fipronil sulfone (range 0.1 – 4 ng/mL), providing  
397 clear evidence that humans are regularly exposed to fipronil. Interestingly the highest  
398 concentrations found in this study were only half of the occupationally exposed worker serum  
399 levels reported<sup>17</sup>.

400 The general population likely shares specific exposure routes. One of the most likely routes of  
401 exposure is contact with pets that have received applications of fipronil (i.e. Frontline® Plus) or  
402 have had contact with indoor/outdoor applications around the home. Notably, Morgan et al.  
403 (2008) concluded that family pets can act as vehicles for human exposure to the  
404 organophosphorous insecticides, such as diazinon<sup>30</sup>. Specifically, fipronil is widely used to  
405 control residential insect pests such as termites and fire ants outdoors where pets frequent,  
406 leading to transport of the material indoors. Furthermore, many flea and tick topical products  
407 contain approximately 10% fipronil and are applied directly to the skin and fur of dogs and cats,  
408 leading to human exposure to fipronil through direct contact with their pets. Dyk et al. (2012)  
409 used a fluorescent indicator to show that these fipronil residues are easily transferred from pets to  
410 humans by way of direct contact for one week following application<sup>31</sup>. According to estimates  
411 from the American Humane Association, up to 46% and 39% of US households keep dogs and  
412 cats, respectively. Use of fipronil containing products with these animals could conceivably  
413 result in some measurable human exposures. Ongoing efforts in our lab (data not shown) are  
414 investigating domestic indoor sources of exposure that may be important, since local waste water  
415 treatment plant (WWTP) effluent is shown to contain fipronil and metabolites.

416 Statistical analysis showed that higher concentrations of fipronil sulfone in human serum was  
417 correlated with increasing age and that people who self-identified as Caucasians had median  
418 concentrations of fipronil sulfone in serum that was significantly higher than those who self-  
419 identified as African Americans. The difference in the two races was particularly interesting,  
420 since the *p* value was very small and noticeable trends can be seen in the data with respect to  
421 detects and non-detects (see Supporting Information). No conclusions can be drawn from these  
422 observations because the sample set was from a relatively small subset of the population and no  
423 metadata was known. However, factors such as race or socioeconomic status have been found to  
424 influence exposure rates for other chemical classes<sup>32-34</sup>.

425 While the target of fipronil is insects, the two trifluoromethyl groups of fipronil may increase  
426 the compound's absorption and distribution upon accidental exposure by humans.  
427 Approximately 20-25% of drugs produced in the pharmaceutical industry contain at least one  
428 strategically incorporated fluorine atom (usually in the form of either one fluorine atom or a  
429 trifluoromethyl group) because fluorine can significantly impact lipophilicity and improve the  
430 bioavailability of orally administered drugs. Several studies have shown that the addition of  
431 fluorine, the most electronegative element, can decrease the pKa and therefore basicity of  
432 surrounding functional groups<sup>35, 36</sup>. Although the effect is not always predictable, this decreased  
433 basicity stabilized molecules in the harsh acidic conditions of the stomach and increases  
434 bioavailability<sup>37, 38</sup>. Another factor that affects the absorption and distribution of a molecule is  
435 lipophilicity. Compounds usually enter into cell membranes via passive transport (although  
436 active transport is an alternate mechanism). Passive transport requires that the molecule is able to  
437 permeate the cell membrane, but also avoid entrapment by the lipid bilayer. The electron  
438 withdrawing capabilities of fluorine can, in some cases, be incorporated to tune a compound's



439 lipophilicity and ease passive transport into cells<sup>39-41</sup>. Fipronil's presence in human serum  
440 demonstrated that the chemical is, in fact, absorbed by humans. Further, Hainzl et. al (1996)  
441 found that fipronil lost almost all activity in neurotoxicity studies on mice without the  
442 trifluoromethylsulfinyl functional group.<sup>2</sup> Metabolites of fipronil have also been found in many  
443 rat tissues, including brain cells<sup>2, 4, 9</sup>, demonstrating that even highly selective membranes are  
444 somewhat permeable to these chemicals. The fluorinated functional groups may increase  
445 fipronil's potency as an insecticide; however, they may also increase absorption and distribution  
446 of the potentially toxic compound in non-target organisms, such as humans. Considering that  
447 fipronil has been associated with endocrine disruption, neurotoxicity, and carcinogenicity<sup>11-14</sup>,  
448 accidental exposure and increased bioavailability may be problematic.

449 In conclusion, previously reported metabolites in rat urine and serum were confirmed, and two  
450 novel urinary metabolites have been proposed. The putative biomarkers determined in the rodent  
451 study were used in human serum analysis, where fipronil sulfone was found in approximately  
452 25% of serum samples from a random population of North Carolina residents. Serum fipronil  
453 levels in our study suggest that human exposure to fipronil may be common, and comparable to  
454 occupationally exposed workers. Matched urine was also analyzed, but no fipronil or any of its  
455 metabolites were identified, which suggests that urine may not be an appropriate matrix for  
456 biomonitoring populations with no known exposure to fipronil. More extensive characterization  
457 of the metabolites produced in humans exposed to higher levels of fipronil, as well as the effects  
458 from low but chronic exposure to fipronil is needed. Further investigations are also necessary to  
459 describe the sources of fipronil exposure and identify rates of exposure in other populations.

460

461 AUTHOR CONTRIBUTIONS

462 The manuscript was written through equal contributions of all authors. All authors have given  
463 approval to the final version of the manuscript.

#### 464 ACKNOWLEDGMENTS

465 This research was supported by an appointment to the Research Participation Program at the  
466 National Exposure Research Laboratory administered by the Oak Ridge Institute for Science  
467 Education through an interagency agreement between the U.S. Department of Energy and the  
468 U.S. Environmental Protection Agency. We thank Agilent Technologies for providing us with  
469 the LC/TOF mass spectrometer under a CRADA (#437-07) that was used to investigate  
470 metabolic products. We also thank Michael Hays of US EPA who kindly allowed the use of his  
471 LC/Q-TOF mass spectrometer for further structure elucidation, Benny Pyke of Arizona State  
472 University for discussions on detection of fipronil in human urine, and Matthew Stiegel for help  
473 with statistics.

474

475

476

#### 477 DISCLAIMER

478 This article will be reviewed in accordance with the policy of the National Exposure Research  
479 Laboratory, U.S. Environmental Protection Agency, and approved for publication. Approval  
480 does not signify that the contents necessarily reflect the view and policies of the Agency, nor  
481 does mention of trade names or commercial products constitute endorsement or recommendation  
482 for use.

483

484 REFERENCES

485

- 486 1. Brassard, D.; Haddad, S.; Hill, E., US EPA BEAD Chemical Profile for Registration  
487 Review: Fipronil (PC Code: 129121). In 2011.
- 488 2. Hainzl, D.; Casida, J. E., Fipronil insecticide: Novel photochemical desulfinylation with  
489 retention of neurotoxicity. *Proceedings of the National Academy of Sciences* **1996**, *93*, 12764-  
490 12767.
- 491 3. Ikeda, T.; Nagata, K.; Kono, Y.; Yeh, J. Z.; Narahashi, T., Fipronil modulation of  
492 GABAA receptor single-channel currents. *Pest Management Science* **2004**, *60*, (5), 487-492.
- 493 4. Hainzl, D.; Cole, L. M.; Casida, J. E., Mechanisms for Selective Toxicity of Fipronil  
494 Insecticide and Its Sulfone Metabolite and Desulfinyl Photoproduct. *Chemical Research in*  
495 *Toxicology* **1998**, *11*, 1529-1535.
- 496 5. Rhône-Poulenc Agro to boost fipronil production. *Agrow* **1997**, *294*, 17.
- 497 6. *Trends in Concentrations of Pesticides in Urban Streams in the United States, 1992-*  
498 *2008*; USGS.
- 499 7. Gunasekara, A. S.; Truong, T.; Goh, K. S.; Spurlock, F.; Tjeerderma, R. S.,  
500 Environmental fate and toxicology of fipronil. *Journal of Pesticide Science* **2007**, *32*, 189-199.
- 501 8. Erickson, B. E., Europe to ban fipronil pesticide to protect bees. *Chemical & Engineering*  
502 *News Archive* **2013**, *91*, (29), 21.
- 503 9. Cravedi, J. P.; Delous, G.; Zalko, D.; Viguie, C.; Debrauwer, L., Disposition of fipronil in  
504 rats. *Chemosphere* **2013**, *93*, 2275-2283.
- 505 10. Tingle, C. C. D.; Rother, J. A.; Dewhurst, C. F.; Lauer, S.; King, W. J., Fipronil:  
506 Environmental Fate, Ecotoxicology, and Human Health Concerns. *Reviews of Environmental*  
507 *Contamination and Toxicology* **2003**, *176*, 1-66.
- 508 11. Ohi, M.; Dalsenter, P. R.; Andrade, A. J. M.; Nascimento, A. J., Reproductive adverse  
509 effects of fipronil in Wistar rats. *Toxicology Letters* **2004**, *146*, (2), 121-127.
- 510 12. Raquel, P.; Tercariol, G.; Godinho, A. F., Behavioral effects of acute exposure to the  
511 insecticide fipronil. *Pesticide Biochemistry and Physiology* **2011**, *99*, 221-225.
- 512 13. *New Pesticide Fact Sheet for Fipronil*; US EPA: 1996.
- 513 14. Vidau, C.; Gonzalez-Polo, R. A.; Niso-Santano, M.; Gomez-Sanchez, R.; Bravo-San  
514 Pedro, J. M.; Pizarro-Estrella, E.; Blasco, R.; Brunet, J. L.; Belzunces, L. P.; Fuentes, J. M.; ,

- 515 Fipronil is a powerful uncoupler of oxidative phosphorylation that triggers apoptosis in human  
516 neuronal cell line SHSY5Y. *NeuroToxicology* **2011**, *32*, 935-943.
- 517 15. Mohamed, F.; Senarathna, L.; Percy, A.; Abeyewardene, M.; Eaglesham, G.; Cheng, R.;  
518 Azher, S.; Hittarage, A.; Dissanayake, W.; Sheriff, M. H.; Davies, W.; Buckley, N. A.; M., E.,  
519 Acute human self-poisoning with the N-phenylpyrazole insecticide fipronil--a GABAA-gated  
520 chloride channel blocker. *Journal of Toxicology. Clinical Toxicology* **2004**, *42*, 955-963.
- 521 16. Tang, J. A.; Usmani, K.; Hodgson, E.; Rose, R. L., In vitro metabolism of fipronil by  
522 human and rat cytochrome P450 and its interactions with testosterone and diazepam. *Chemico-*  
523 *Biological Interactions* **2004**, *147*, (3), 319-329.
- 524 17. Herin, F.; Boutet-Robinet, E.; Levant, A.; Dulaurent, S.; Manika, M.; Galatry-Bouju, F.;  
525 Caron, P.; Soulat, J.-M., Thyroid function tests in persons with occupational exposure to fipronil.  
526 *Thyroid* **2011**, *21*.
- 527 18. Lyke, D. F.; McDaniel, K. L.; Moser, V. C.; Herr, D. W., Effects produced by single and  
528 repeated dosages of fipronil on the EEG of Long-Evans rats. *The Toxicologist CD-An Official*  
529 *Journal of the Society of Toxicology* **2011**, *120*, 290.
- 530 19. Herr, D. W.; Lyke, D. F.; McMahan, R.; Strynar, M.; Hedge, J. M.; McDaniel, K. L.;  
531 Moser, V. C., Changes in rat serum bioindicators after single or repeated dosages of fipronil. *The*  
532 *Toxicologist CD - An Official Journal of the Society of Toxicology* **2014**, *138*, (1), 490.
- 533 20. Xie, T.; Liang, Y.; A, J.; Hao, H.; Liu, L.; Zheng, X.; Dai, C.; Zhou, Y.; Guan, T.; Liu,  
534 Y.; Xie, L.; Wang, G., Post acquisition data processing techniques for lipid analysis by  
535 quadrupole time-of-flight mass spectrometry. *Journal of Chromatography B* **2012**, *905*, (0), 43-  
536 53.
- 537 21. In *Pesticide Residues in Food. Fipronil: Residue Evaluation 2001.*, Joint Meeting on  
538 Pesticide Residues in Food
- 539 22. Lacroix, M. Z.; Puel, S.; Toutain, P. L.; Viguie, C., Quantification of fipronil and its  
540 metabolite fipronil sulfone in rat plasma over a wide range of concentrations by LC/UV/MS.  
541 *Journal of Chromatography B* **2010**, *878*, 1934-1938.
- 542 23. In *Pesticide Residues in Food. Fipronil: Residue evaluation 1997.*, Joint Meeting on  
543 Pesticide Residues in Food.
- 544 24. Kim, D.; Guengerich, F. P., CYTOCHROME P450 ACTIVATION OF ARYLAMINES  
545 AND HETEROCYCLIC AMINES. *Annual Reviews in Pharmacology and Toxicology* **2005**, *45*,  
546 27-49.
- 547 25. Snyderwine, E. G.; Turesky, R. J.; Turteltaub, K. W.; Davis, C. D.; Sadrieh, N.; Schut, H.  
548 A. J.; Nagao, M.; Sugimura, T.; Thorgeirsson, U. P.; Adamson, R. H.; Thorgeirsson, S. S.,  
549 Metabolism of food-derived heterocyclic amines in nonhuman primates. *Mutation*  
550 *Research/Fundamental and Molecular Mechanisms of Mutagenesis* **1997**, *376*, (1-2), 203-210.

- 551 26. Eisenbrand, G.; Tang, W., Food-borne heterocyclic amines. Chemistry, formation,  
552 occurrence, and biological activities. A literature review. *Toxicology* **1993**, *12*, 1-82.
- 553 27. Pezdirc, M.; Zegura, B.; Filipic, M., Genotoxicity and induction of DNA damage  
554 responsive genes by food-borne heterocyclic aromatic amines in human hepatoma HepG2 cells.  
555 *Food Chem. Toxicol.* **2013**, *59*, 386-394.
- 556 28. Nagao, M.; Sugimura, T., Carcinogenic factors in food with relevance to colon cancer  
557 development. *Mutation Research/Fundamental and Molecular Mechanisms of Mutagenesis*  
558 **1993**, *290*, (1), 43-51.
- 559 29. Schut, H. A. J.; Snyderwine, E. G., DNA adducts of heterocyclic amine food mutagens:  
560 implications for mutagenesis and carcinogenesis. *Carcinogenesis* **1999**, *20*, (3), 353-368.
- 561 30. Morgan, M. K.; Stout, D. M.; Jones, P. A.; Barr, D. B., An observational study of the  
562 potential for human exposures to pet-borne diazinon residues following lawn applications.  
563 *Environmental Research* **2008**, *107*, 336-342.
- 564 31. Dyk, M. B.; Liu, Y.; Chen, Z.; Vega, H.; Krieger, R. I., Fate and distribution of fipronil  
565 on companion animals and in their indoor residences following spot-on flea treatments. *Journal*  
566 *of Environmental Science and Health, Part B* **2012**, *47*, 913-924.
- 567 32. Hertz-Picciotto, I.; Cassady, D.; Lee, K.; Bennett, D.; Ritz, B.; Vogt, R., Study of Use of  
568 Products and Exposure-Related Behaviors (SUPERB): study design, methods, and demographic  
569 characteristics of cohorts. *Environmental Health* **2010**, *9*, (1), 54.
- 570 33. Zota, A. R.; Rudel, R. A.; Morello-Frosch, R. A.; Brody, J. G., Elevated House Dust and  
571 Serum Concentrations of PBDEs in California: Unintended Consequences of Furniture  
572 Flammability Standards? *Environmental Science & Technology* **2008**, *42*, (21), 8158-8164.
- 573 34. Windham, G. C.; Pinney, S. M.; Sjodin, A.; Lum, R.; Jones, R. S.; Needham, L. L.; Biro,  
574 F. M.; Hiatt, R. A.; Kushi, L. H., Body burdens of brominated flame retardants and other  
575 persistent organo-halogenated compounds and their descriptors in US girls. *Environmental*  
576 *Research* **2010**, *110*, (3), 251-257.
- 577 35. van Niel, M. B.; Collins, I.; Beer, M. S.; Broughton, H. B.; Cheng, S. K. F.; Goodacre, S.  
578 C.; Heald, A.; Locker, K. L.; MacLeod, A. M.; Morrison, D.; Moyes, C. R.; O'Connor, D.; Pike,  
579 A.; Rowley, M.; Russell, M. G. N.; Moyes, C. R.; O'Connor, D.; Pike, A.; Rowley, M.; Russell,  
580 M. G. N.; Sohal, B.; Stanton, J. A.; Thomas, S.; Verrier, H.; Watt, A. P.; Castro, J. L.,  
581 Fluorination of 3-(3-(piperidin-1-yl)propyl)indoles and 3-(3-(piperazin-1-yl)propyl)indoles gives  
582 selective human 5-HT1D receptor ligands with improved pharmacokinetic profiles. *Journal of*  
583 *Medicinal Chemistry* **1999**, *42*, (12), 2087-2104.
- 584 36. Rowley, M.; Hallett, D. J.; Goodacre, S.; Moyes, C.; Crawforth, J.; Sparey, T. J.; Patel,  
585 S.; Marwood, R.; Patel, S.; Thomas, S.; Hitzel, L.; O'Connor, D.; Szeto, N.; Castro, J. L.;  
586 Hutson, P. H.; MacLeod, A. M., 3-(4-fluoropiperidin-3-yl)-2-phenylindoles as high affinity,  
587 selective, and orally bioavailable h5-HT2A receptor antagonist. *Journal of Medicinal Chemistry*  
588 **2001**, *44*, (10), 1603-1614.

- 589 37. Chambers, R. D., *Fluorine in Organic Chemistry*. Blackwell Publishing: Oxford, 2000.
- 590 38. Morgenthaler, M.; Schweizer, E.; Hoffmann-Ro, A.; Martin, R. E.; Jaeschke, G.;  
591 Wagner, B.; Fischer, H.; Bendels, S.; Zimmerli, D.; Schneider, J.; Diederich, F.; M., K.; Mu, K.,  
592 Predicting properties and tuning physicochemical in lead optimization: Amine basicities.  
593 *ChemMedChem* **2007**, 2, 1100.
- 594 39. Purser, S.; Moore, P. R.; Swallow, S.; Gouverneur, V., Fluorine in medicinal chemistry.  
595 *Chemical Society Reviews* **2008**, 37, (2), 320-330.
- 596 40. Smart, B. E., Fluorine Substituent Effects (on bioactivity). *Journal of Fluorine Chemistry*  
597 **2001**, 109, (1), 3-11.
- 598 41. Smith, D. A.; van de Waterbeemd, H.; Walker, D. K., Methods and Principles in  
599 Medicinal Chemistry, vol 31: Pharmacokinetics and Metabolism in Drug Design. *Wiley-VCH*  
600 **2006**, 31.

601

602

#### 603 4. SUPPORTING INFORMATION

604 **5.1 Rodents** were housed in polycarbonate cages containing heat-treated hardwood chip  
605 bedding. Access to food (Purina 5008 Chow; Lab Diet/PMI Nutrition International, Richmond,  
606 IN) and tap water was provided *ad libitum*. Animals were allowed to acclimate to their  
607 surroundings in the animal colony for 5-7 days before beginning any tests. The animal colony  
608 was maintained at a temperature of  $22 \pm 2$  °C, with humidity at  $40 \pm 20\%$ , and a 12:12 hr  
609 light:dark cycle (light on at 6:00 a.m.).

610 **5.2 Recovery Experiment for Fipronil in Dosed-rat Serum.** Standard fipronil (200 ng) was  
611 added to a vial containing blank rat serum (100  $\mu$ L), along with 100  $\mu$ L of 0.1 M formic acid and  
612 1 mL of cold acetonitrile. The solution was centrifuged at  $12,500 \times g$ , and the supernatant was  
613 extracted. In a separate vial, blank rat serum was directly spiked with fipronil standard (200 ng).

614 Both the supernatant and the control sample were mixed 50:50 with 10 mM ammonium acetate  
615 buffer and analyzed via LC/triple-quad. The fipronil recovery rate was 98%.

616 **5.3 Recovery Experiment for Fipronil in Spiked Human Serum.** A standard mix of fipronil  
617 metabolites (10 ng each metabolite) was added to a vial containing blank calf serum (200  $\mu$ L),  
618 along with 25  $\mu$ L of a 0.1 M formic/internal standard solution (fipronil des-F<sub>3</sub>, 10 ng) and 2 mL  
619 of acetonitrile. The solution was centrifuged at 12,500  $\times$  g and was extracted onto an Oasis 3cc  
620 HLB solid phase extraction cartridge. The solid phase extraction method consisted of  
621 conditioning the cartridge with 3 mL of methanol followed by 3 mL of DI water; loading the  
622 sample; washing with 3 mL of 95:5 water:acetonitrile; and eluting with 3 mL of acetonitrile. The  
623 samples were evaporated under N<sub>2</sub> at 40 °C until 200  $\mu$ L remained. In a separate vial (the control  
624 sample), only 200  $\mu$ L of blank calf serum, 25  $\mu$ L of the 0.1 M formic acid/internal standard  
625 solution and 2 mL of acetonitrile was added (no fipronil or metabolites), and this vial was also  
626 carried through the procedure, just as the experimental sample. The control sample was spiked  
627 with the standard mix of fipronil metabolites (10 ng/metabolite) after evaporation. All the  
628 samples were prepared 50:50 with 10 mM ammonium acetate buffer, and analyzed via LC/triple-  
629 quad ( $n=3$ ). The results are shown below in SI Table 1.

630

631 **SI Table 1.** Human serum recovery experiment results.

| Compound            | Average % Recovery ( $\pm$ %RSD) |
|---------------------|----------------------------------|
| Fipronil            | 82 $\pm$ 2.4                     |
| Fipronil sulfone    | 83 $\pm$ 3.6                     |
| Fipronil sulfide    | 84 $\pm$ 3.6                     |
| Fipronil amide      | 82 $\pm$ 7.3                     |
| Monochloro fipronil | 85 $\pm$ 3.5                     |

632

633

634 **5.4 Recovery Experiment for Fipronil in Spiked Human Urine.** A standard mix of fipronil  
635 metabolites (400 ng/metabolite) was added to a vial containing 10 mL of blank human urine and  
636 1 mL of acetonitrile/internal standard solution (fipronil des-F<sub>3</sub>, 33 ng). The solution was  
637 extracted onto an Oasis 6cc HLB solid phase extraction cartridge. The solid phase extraction  
638 method was the same as for human serum, except the elution step used 5 mL instead of 3 mL of  
639 acetonitrile. The solution was evaporated under N<sub>2</sub> at 40 °C until 1 mL remained. In the control  
640 sample, 10 mL of blank human urine and 1 mL acetonitrile were added (no fipronil or  
641 metabolites), and this vial was also carried through the procedure, just as the experimental  
642 samples. After evaporation the control sample was spiked with the standard fipronil metabolite  
643 mixture (400 ng/metabolite). All samples were prepared 50:50 with 10 mM ammonium acetate  
644 buffer and analyzed via LC/triple-quad (*n*=3). The results are shown below in SI Table 2.

645 **SI Table 2.** Human urine recovery experiment results.

| <b>Compound</b>     | <b>Average % Recovery (± %RSD)</b> |
|---------------------|------------------------------------|
| Fipronil            | 103 ±5.8                           |
| Fipronil sulfone    | 100 ±10                            |
| Fipronil sulfide    | 99 ±7.0                            |
| Fipronil amide      | 104 ±3.8                           |
| Monochloro fipronil | 101 ±5.0                           |

646

647

648

649

650

651



652 **5.5 Quantitation of fipronil and fipronil sulfone in the serum of treated rodents.** Rat serum  
653 (25  $\mu$ L) was denatured with 100  $\mu$ L of 0.1 M formic acid and precipitated with 1 mL of a cold  
654 acetonitrile solution spiked with the internal standard (fipronil des-F<sub>3</sub>, 25 ng). The sample was  
655 then centrifuged for 5 minutes at 12500  $\times$  g. An aliquot of the supernatant was mixed 50:50 with  
656 10 mM ammonium acetate buffer, and analyzed via LC/TOF and LC/triple-quad.  $n=9$  for high  
657 dose (10 mg/kg/day) ;  $n=10$  for low dose (5 mg/kg/day); and  $n=11$  for control animals, which  
658 were treated with vehicle. To determine the concentration of compounds of interest, a nine-point  
659 matrix-matched extracted standard curve from 10-5000 ng/mL, a method blank (DI water), and a  
660 matrix blank (blank rat serum) was run with the rat serum samples via LC/triple-quad. The  
661 lowest value on the standard curve (10 ng/mL) was considered the lower limit of quantitation  
662 (LOQ). The results of the quantitation are shown in SI Table 3.

663 **SI Table 3.** Descriptive statistics and select percentiles for fipronil and fipronil sulfone in rat  
664 serum.

| Compound | Dose Conc. (mg/kg bw) | LOQ (ng/mL) | %<LOQ | Min   | 5%    | 25%   | 50%   | 75%   | 95%   | Max   |
|----------|-----------------------|-------------|-------|-------|-------|-------|-------|-------|-------|-------|
| Fipronil | Control               | 10          | 91    | <LOQ  | <LOQ  | <LOQ  | <LOQ  | 0.419 | 13.8  | 10.1  |
| Sulfone  | Control               | 10          | 91    | <LOQ  | 0.133 | 1.01  | 1.65  | 2.12  | 8.12  | 13.3  |
| Fipronil | 5                     | 10          | 0     | 4.83  | 4.98  | 5.52  | 8.82  | 11.9  | 12.9  | 13.7  |
| Sulfone  | 5                     | 10          | 0     | 2120  | 2147  | 2250  | 2465  | 2573  | 2630  | 2630  |
| Fipronil | 10                    | 10          | 0     | 6.03  | 6.53  | 8.07  | 11.7  | 17.0  | 26.6  | 29.3  |
| Sulfone  | 10                    | 10          | 0     | 2,880 | 2,952 | 3,110 | 3,670 | 3,990 | 4,180 | 4,280 |

665  
666  
667  
668  
669  
670

671 **5.6 Quantitation of fipronil sulfone in the urine of treated rodents.** Rat urine (100  $\mu$ L) was  
672 treated with 900  $\mu$ L of cold acetonitrile. The sample was then centrifuged for 8 minutes at  
673  $12,500 \times g$ , prepared 50:50 with 10mM ammonium acetate buffer, and analyzed via LC/triple-  
674 quad.  $n = 2$  for high dose (10 mg/kg/day);  $n = 4$  for low dose (5 mg/kg/day); and  $n = 6$  for  
675 control animals. In order to determine concentration of compounds of interest, a seven-point  
676 extracted standard curve prepared in DI water from 10-5000 ng/mL, along with a method blank  
677 (DI water) was run with the experimental rat urine samples. SI Figure 1 shows median fipronil  
678 sulfone concentrations for rodents dosed with fipronil. The high dose group had a median  
679 concentration of  $32 \pm 13$  ng/mL fipronil sulfone, while the low dose group had  $25 \pm 19$  ng/mL  
680 and the control animals had  $0 \pm 4$  ng/mL.

681 The LC/triple quad used for the quantitation of fipronil sulfone was a Waters Acquity  
682 ultraperformance liquid chromatography system coupled with a Waters Quatro Premier XE triple  
683 quadrupole mass spectrometer (UPLC-MS/MS; Waters Corporation). A 20- $\mu$ L aliquot of each  
684 sample was injected onto an Acquity UPLC BEH C18 column (1.7  $\mu$ m, 2.1  $\times$  50 mm; Waters  
685 Corporation) that was maintained at 50  $^{\circ}$ C. The mobile phase consisted of solvent A: 2 mM  
686 ammonium acetate buffer with 5% methanol and solvent B: acetonitrile at a flow rate of 400  
687  $\mu$ L/min, starting with 75% solvent A for 30 s and then increasing to 90% solvent B at 3.5 min  
688 and 100% solvent B at 3.6 min and held for 0.9 min. At 4.6 min the gradient was returned to  
689 60% solvent A and held until 6.0 min. Electrospray negative ionization was used in the mass  
690 spectrometer source. The capillary voltage was set at negative 0.4 kV, and the source  
691 temperature was 150  $^{\circ}$ C. The primary transition used for quantitation was 451.2 - 244.0  $m/z$ , and  
692 two other transitions were monitored for confirmation, 451.2 to 281.9  $m/z$  and 451.2 to 414.9  
693  $m/z$ .

694

695

696

697

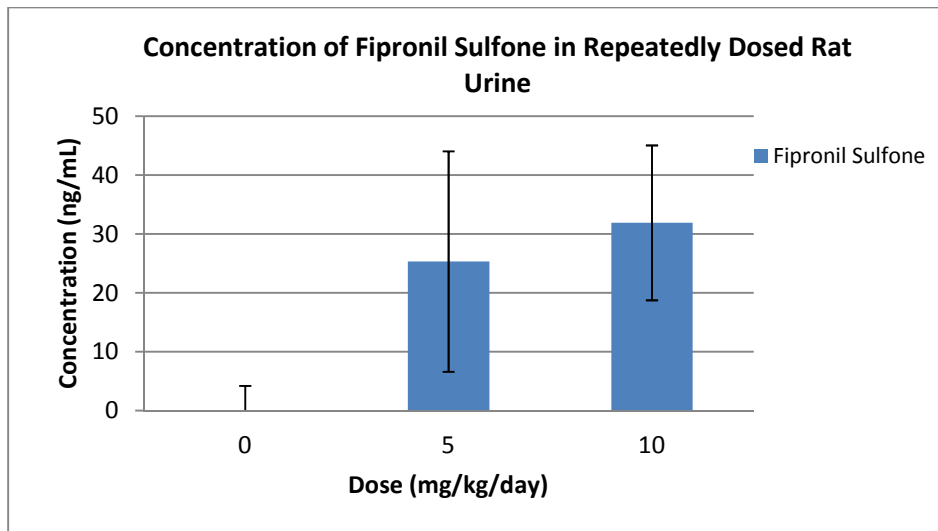

698

699 **SI Figure 1.** Median fipronil sulfone concentration in rat urine.

700

701

702

703

704

705

706

707 **5.7 Time-of-flight mass spectrometry scoring and isotope patterns.**

708

709

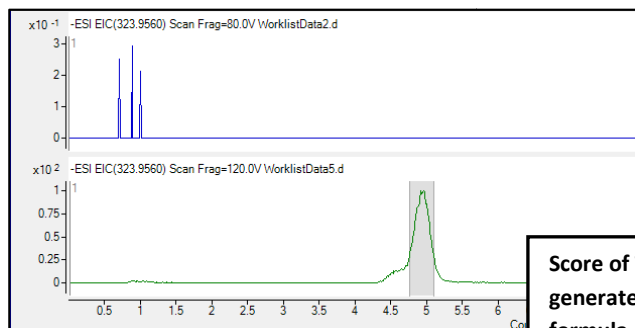

Score of TOF-generated molecular formula.

| Best | DBE | Formula             | Score | 324.9633 | 324.9633 |
|------|-----|---------------------|-------|----------|----------|
| 8    |     | C10 H4 Cl2 F3 N3 O2 | 99.46 |          |          |

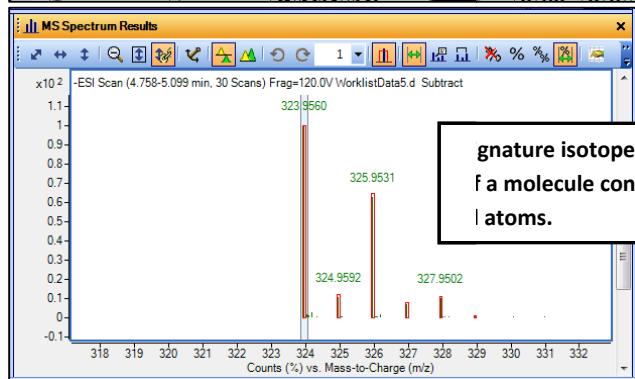

Signature isotope pattern of a molecule containing 2 chlorine atoms.

710

711

712 **SI Figure 2** shows the spectral pattern of a molecule containing 2 chlorine atoms. Note that  
713 323.9560  $m/z$  is the most abundant isotope, 325.9531  $m/z$  contains one  $^{37}\text{Cl}$ , and 327.9502  $m/z$   
714 contains two  $^{37}\text{Cl}$ . The 324.9592  $m/z$  contains one  $^{13}\text{C}$ . The numerical ranking for formula  
715 generated for compound (M4) is shown. The top extracted ion chromatograph (Worklist Data 2)  
716 shows a control animal sample and the absence of a peak for M4.

717

718

719

720

721 **5.8 Metabolite M7 in rat urine**

722

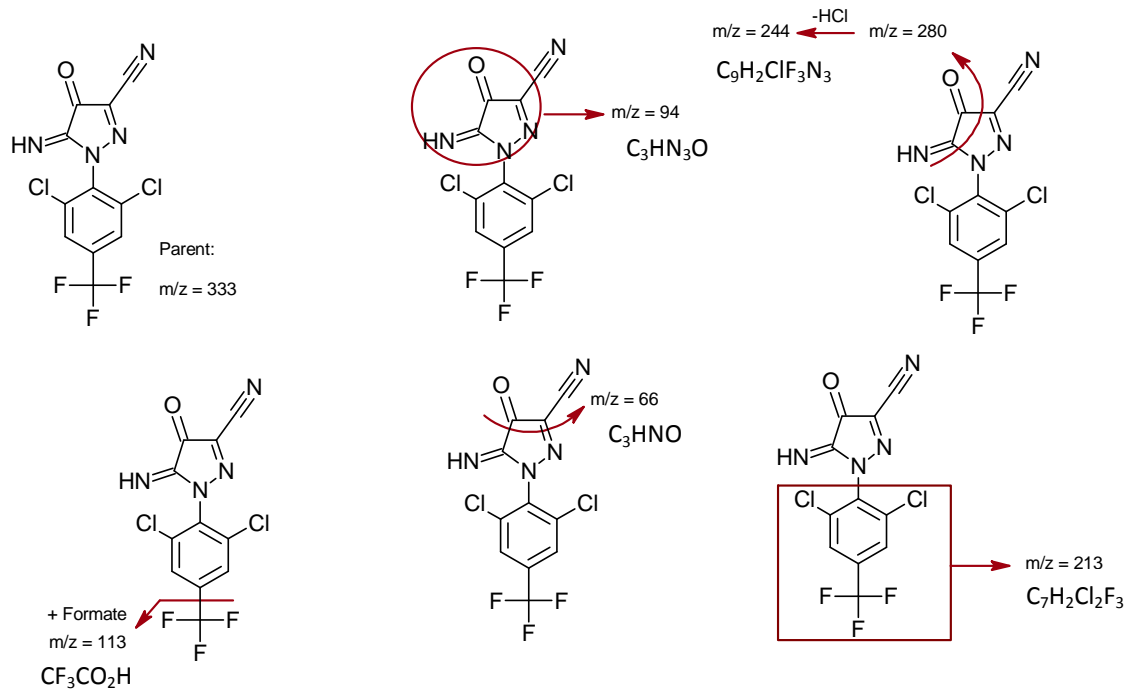

723  
724

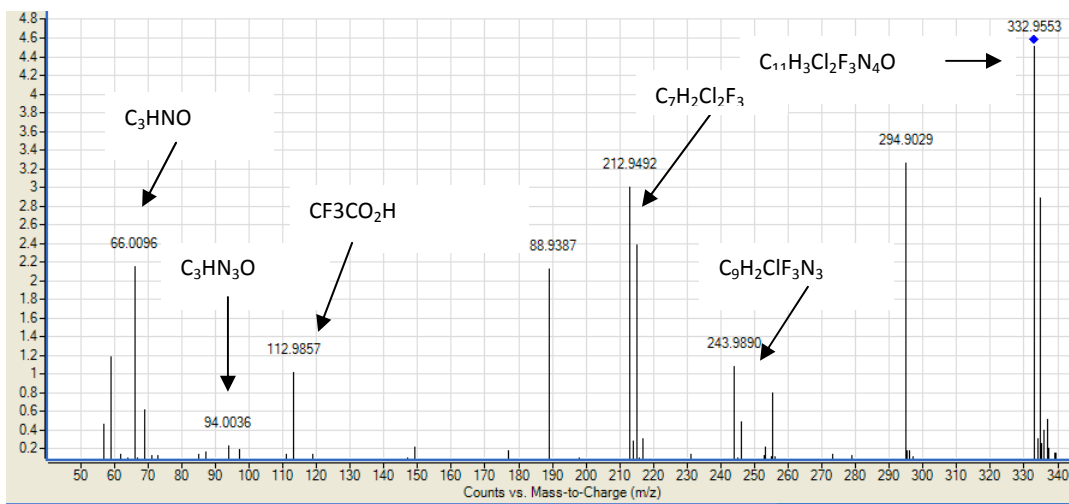

725

726 **SI Figure 3** shows the fragmentation pattern of Metabolite M7 in the LC/Q-TOF. The red  
727 circles/boxes show the fragment and the spectrum at the bottom shows the peaks corresponding  
728 to the fragments.

729 **5.9 Statistical Data.** Statistical analyses of the human serum data was performed. Rank  
730 comparisons for gender and race was done by a Mann-Whitney test. A Spearman Correlation  
731 analysis was also used to evaluate the relationship between age and concentration of fipronil  
732 sulfone in serum.

733 **Gender:** A two-tailed unpaired Mann-Whitney test was performed to compare the ranks  
734 between genders. The gender were not significantly different (P=0.99 and Mann-Whitney  
735 U=959.5). SI Table 4 shows the number of detects and non-detects for each gender.

736

737 **SI Table 4.** Number of detects and non-detects for the genders.

| <b>Gender</b> | <b>Detects</b> | <b>Non-Detects</b> | <b>Number of Samples</b> |
|---------------|----------------|--------------------|--------------------------|
| <b>Male</b>   | 7              | 12                 | 29                       |
| <b>Female</b> | 17             | 67                 | 67                       |

738

739

740

741

742

743

744

745

746

747 **Age:** A two-tailed Spearman Correlation analysis was performed to evaluate whether there was  
748 a relationship between age and concentration of fipronil sulfone. The correlation between age  
749 and concentration was significant (Spearman  $r = 0.21$  and  $p = 0.0418$ ). SI Figure 5 shows the  
750 linear regression.

751

752

753

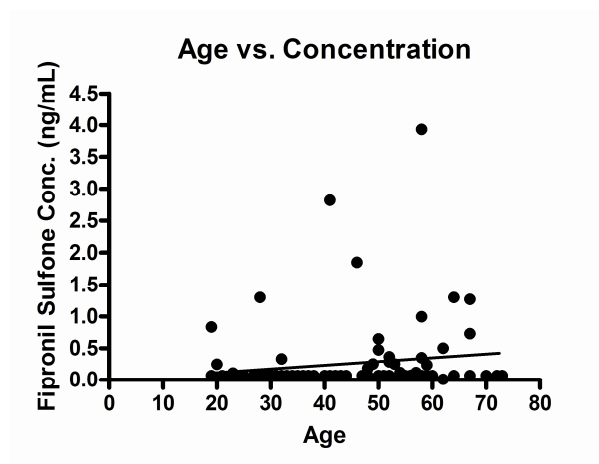

754

755 **SI Figure 5.** Correlation between age and concentration of fipronil sulfone.

756

757

758

759  
760  
761  
762  
763  
764  
765  
766  
767  
768  
769  
770  
771  
772  
773  
774  
775  
776

**Race:** A nonparametric analysis of the mean fipronil sulfone concentrations of the sample of people who self-identified as either Caucasian ( $n=62$ ) or African American ( $n=34$ ) origin was performed. The Asian and “other” categories were excluded because there were not enough samples in those categories for statistical analyses. According to a two-tailed unpaired Mann-Whitney test, there was found to be a significant difference in the ranks of the concentrations between the two races ( $p = <0.0001$  and Mann-Whitney  $U=556$ ). The number of detects and non-detects in each group is shown in SI Table 5. There were a large number of detects in the Caucasian category, but only one detect in the African American category.

**SI Table 5** shows the number of detects vs. non-detects for each race.

| <b>Race</b>             | <b>Detects</b> | <b>Non-Detects</b> | <b>Number of Samples</b> |
|-------------------------|----------------|--------------------|--------------------------|
| <b>Caucasian</b>        | 22             | 39                 | 61                       |
| <b>African American</b> | 1              | 29                 | 30                       |
| <b>Asian</b>            | 1              | 2                  | 3                        |
| <b>Other</b>            | 0              | 2                  | 2                        |



777

778

779 **5.10 Transitions in LC/triple quad method.** SI Table 6 below lists the parent to daughter  
780 transitions which were monitored in the Agilent 1100 LC/triple quad method.

781 **SI Table 6.** LC/triple quad parent-daughter transitions.

| Compound            | Transition | Parent | Daughter |
|---------------------|------------|--------|----------|
| Fipronil            | 1°         | 434.9  | 329.8    |
| Fipronil            | 2°         | 434.9  | 249.9    |
| Fipronil            | 3°         | 434.9  | 277.8    |
| Fipronil sulfone    | 1°         | 451.1  | 415.0    |
| Fipronil sulfone    | 2°         | 451.1  | 281.9    |
| Fipronil sulfone    | 3°         | 451.1  | 243.9    |
| Fipronil sulfide    | 1°         | 418.9  | 382.8    |
| Fipronil sulfide    | 2°         | 418.9  | 261.7    |
| Fipronil sulfide    | 3°         | 418.9  | 313.8    |
| Fipronil amide      | 1°         | 452.9  | 347.7    |
| Fipronil amide      | 2°         | 452.9  | 303.8    |
| Fipronil amide      | 3°         | 452.9  | 271.9    |
| Monochloro fipronil | 1°         | 401.1  | 283.9    |
| Monochloro fipronil | 2°         | 401.1  | 295.9    |
| Monochloro fipronil | 3°         | 401.1  | 331.9    |
| Fipronil des F3     | 1°         | 387.2  | 281.9    |
| Fipronil des F3     | 2°         | 387.2  | 331.0    |
| Fipronil des F3     | 3°         | 387.2  | 351.0    |

782

783

784

785

786

787

788

789

790 **5.11 SI Figure 6** shows fipronil des-F<sub>3</sub> which was used as an internal standard for analytical  
791 methods due to its similarity in structure to fipronil. The structure is shown below.

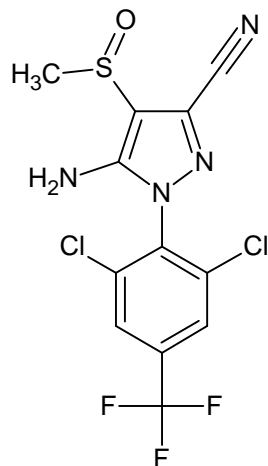

792

793

794 Molecular Formula: C<sub>12</sub>H<sub>7</sub>Cl<sub>2</sub>F<sub>3</sub>N<sub>4</sub>OS

795 Monoisotopic Mass: 381.966971 Da

796 [M-H]<sup>-</sup>: 380.959694 Da

797

798

Dr. Alcock,

Thank you for the comments on our recently submitted manuscript entitled: "Identification of fipronil metabolites by time-of-flight mass spectrometry for application in a human exposure study" (Manuscript ID: ENVINT-D-14-01277). We appreciated the reviewers' careful reading and criticism of this manuscript, and we thank them for their considerable efforts to help improve this submission. We have made a substantial revision of this work by responding to the reviewers' comments. A point-by-point response to each of the comments follows:

Reviewer 1:

Summary

This manuscript discusses a new analytical method that was developed to identify seven different metabolites of fipronil in the serum and urine samples of male, adult rats. This method was subsequently used to identify the same metabolites in the serum and urine samples of adults from the general population. This is an important manuscript as no published biomonitoring data exist on the nonoccupational exposures of humans to fipronil. In my review, I found the methodology to be quite good, however, the manuscript needs to be written more clearly in several sections, particularly providing more specific details (as described below). I have the following suggested comments to improve the quality of this manuscript.

We appreciate that the reviewer recognizes the importance of the work. In an effort to address his/her concerns about the clarity and specificity of several of the sections, we have made corrections throughout the manuscript, which are highlighted in blue.

Abstract - Provide more detailed information (i.e., number of rats, actual doses, adult rats were used, number of human serum and urine samples, year of studies [rats/human]). Specify the aims/objectives of the manuscript. As this is a methods focused paper, I suggest that you list the actual seven metabolites that you identified in rat serum/urine if space permits (or at least the two newly identified metabolites). Suggest removing the following sentence (line 32) "These results are comparable to the results from an exposure study of workers in a fipronil production facility" (statement is vague and belongs more in the discussion section).

As to provide more detailed information on the dosed rodent study, we cited the Freeborn et al. manuscript that contains all pertinent details for which the reviewer asked. However, for the reviewer:

The study was performed from 10/10/12 – 11/20/12.

How many rats (total and by group) were used in this experiment?

0 mg/kg/day: 11 rats; 5 mg/kg/day: 10 rats; 10 mg/kg/day: 9 rats

Space doesn't permit listing the actual seven metabolites identified in the abstract, but we did incorporate the two that were newly identified. We added more details for the dosed rodent and human studies, and, as suggested, we removed line 32. We also expanded the discussion section to cover the comparison of this study with the occupational exposure study in more detail (lines 390-397 in the revised manuscript).

Introduction section - This section does not flow well and needs better organization and more specific details:

We have made some changes, and hopefully the introduction flows better now.

Lines 65 -71: Is there a newer citation of how many tons of fipronil are manufactured in the US or worldwide? The current one cites a 20 year old (1997) report. Make it clear that you are discussing levels of fipronil in only the US, worldwide or both. Suggest deleting the sentence "Perhaps as a result of this contamination, fipronil has been implicated as one of the chemicals associated with colony bee collapse". Instead suggest adding more information, including citations, on identified sources and potential routes of human exposures to fipronil in this paragraph

We cited the most recent reference for production volume that could be found, and we had also cited a more recent EPA report from 2011, which covers from 1998 to 2008. We also altered the text to indicate this (line 66 in the revised manuscript).

Line 72- Suggest first discussing the one case of human poisoning with fipronil and that fipronil sulfone was identified as the primary metabolite (mentioned in Line 83), then discuss the only recent study by Cravedi et al (2013) that examined the toxicokinetics of fipronil in rats administered a single oral dose of 10 mg/kg body weight.

We disagree with the reviewer. We feel as though the introduction is better organized by first discussing information pertaining to rat studies and then information about known human studies. We organized our study in this way, by first dosing rodents, looking for metabolites, and then analyzing human serum and urine for those metabolites.

Line 88- This sentence needs more details about the study by Herin et al, 2011 "One occupational exposure study of workers at a fipronil production facility reports a mean fipronil sulfone level of 7.79 ng/mL." - For example, how many workers, was this a cross sectional study, and year/ location of study.

We added some additional information: the number of workers in the study and the mean and standard deviation of fipronil sulfone in human serum (lines 89-90).

Line 97 (last paragraph) -As mentioned for the abstract, list the specific aims/objectives of this work. The specific aims of the study were included in the introduction: "The specific objectives of the study were to develop a unique workflow where dosed animal samples were used to identify potential serum/urine biomarkers via time-of-flight mass spectrometry which were subsequently evaluated in serum and urine of a group of volunteers from North Carolina to assess exposure." (lines 93-97 in the revised manuscript)

Line 125 - States that the "Animals were dosed repeatedly by oral gavage at either 5 or 10 mg/kg with fipronil..... Did you based this on the weight of individual rats? Suggest removing the word "repeatedly".

Per the reviewer's suggestions, line 125 was changed to "daily". This is important from the toxicological perspective. The rats were weighed daily, and dosing occurred based on the weight of individual animals.

Lines 127-131 - How much trunk blood and urine were collected from each rat? When was the rat study performed? How many rats (total and by group) were used in this experiment?

The Moser et al. paper has all of these details (reference 19). However, for the reviewer, 2 ml of trunk blood was collected for serum. Urine varied by rat (some had none), since the method of collection was by bladder puncture. See earlier comment for when the rodent study was performed and number of rats in the study.

Line 142 - Suggest adding an additional row "number" of subjects for Table 1 and moving it to the results section or alternatively write out this information in a paragraph in the results section.

As the number of subjects is 100, we did not incorporate an additional row in the demographic Table 1, since the rows for percent and number would be repetitive. The number of participants was added to the table header (line 143) for clarification.

Lines 158 & Line 166: For rat serum and rat urine-- Unclear why you had different number of animals for each matrix and by treatment group (5 and 10 mg/kg and control). Were some of the rats dropped (i.e., died) from the experiment?

Details on numbers of rats per group and those dropped are in the Freeborn et al. paper and are beyond the scope of this work. We only used urine and serum for metabolite identification purposes.

Line 174: For human serum - specify here actual number of samples that were analyzed. List here the actual chemicals analyzed in this matrix.

Details on the number of serum samples were already provided in the manuscript, but they were moved to the beginning of the paragraph for clarification (line 173). We also added a sentence to clarify that all chemicals for which standards were possessed and that were in the methods section were included in the mass spec method (line 181).

Line 187: For human urine - specify the number of samples analyzed. Why wasn't the same volume of urine used per sample to analyze for the target chemicals ("5-12 mL" were used)? List the actual chemicals analyzed in this matrix.

Details on the number of urine samples were already provided in the manuscript, but they were moved to the beginning of the paragraph for clarification (line 187). And, as above we added clarification that all chemicals in the methods section were included in the mass spec method (lines 193-194). As for the volume used, we used the volume of urine we received, which differed among samples.

Line 341: Since fipronil sulfone was detected in only 25% of the samples, it is not appropriate to conduct more advanced statistical analysis (i.e., Mann-Whitney/Spearman Correlations) of all human serum data when 75% of the data are censored.

We agree with the reviewer. We have altered the manuscript by removing the statistics sections and discussing only range and trends in number of detects (lines 332-333 and 411 to 414). Table 3 in the revised manuscript was moved from the supporting information to the body of the manuscript. We also added a section on observations in our sample subset, specific to Caucasians (lines 420-423).

Discussion section (Line 395)- Should mention some limitations of this study. In particular, several studies have shown measureable levels of fipronil degradates, include fipronil sulfone, in environmental media. It is possible that some of the measureable levels of fipronil sulfone in the human serum samples could have originated from the preformed metabolite (e.g., fipronil sulfone). So, it may or may not be a useful biomarker?

We thank the reviewer for this suggestion and agree with the reviewer. Line 414-420 were added to discuss study limitations, specifically the limited specificity of fipronil sulfone as a biomarker.

Reviewer #2:

This manuscript describes a LC/TOF-MS method to develop a set of potential serum/urine biomarkers of fipronil exposure and a quantitative LC/MS method to estimate human fipronil exposure. The manuscript is clear; the results for metabolites identification are well described and discussed. However, as the authors explain in discussion (lines 389-391), searching urinary fipronil biomarkers in human known to be exposed to fipronil will be more relevant than human with no known fipronil exposure. Moreover, the results and statistical analysis obtained in human sample are too weak to be published Environment International.

We appreciate the comments from Reviewer 2. Our responses are highlighted in red.

While we agree with the reviewer on most of this point, the samples were samples of convenience. It would be much more applicable to conduct this study in an occupationally exposed cohort as the reviewer suggests, to identify urinary metabolites. However, we are mostly interested in assessing exposure in the general population, and as cited, some occupational exposure work has already been done.

We have altered the statistical treatment of our data per the suggestion of both reviewers. See comments above and below for specifics.

Major concerns:

A proper validation of the quantitation methods for both human and rat samples are lacking (linearity, accuracy, repeatability, reproductibility, validation of LOQ). There is no way to know if the announced LOQ is statistically significant from the blank sample. Moreover 9% of rat controls are contaminated with fipronil and fipronil sulfone (see SI table 3) impeding of the data in particular for low concentration.

For clarification, the human samples had different purposes. The rodent samples were only to identify metabolites. Quantitation of the rodent sample was to determine the best biomarker candidates based on concentration. However, as suggested by the reviewer, we added r-squared values and validated the LLOQ for the human samples (lines 250-254 and 267-270).

In addition, the contamination of fipronil and fipronil sulfone was in only one of the control rat serum samples at the LLOQ (10 ng/mL). Again, these samples were specifically used to identify metabolites for our purposes. SI table 3 was changed to better show the data.

The human population is not big enough and not well documented so that seems not reasonable to make statistical analysis. If the objectives were to determine whether the biomarkers identified in rats are suitable for human biomonitoring survey, working with subjects known to be exposed with fipronil (pet groomers, gardeners...) will be more relevant to search potential fipronil biomarkers in urine and consequently to make statistics on age, race and gender.

We agree with the reviewer and made changes, which were also suggested by reviewer 1, specific to the statistics.

These were samples of convenience. Our objective was to analyze serum and urine samples from people in the general population in order to characterize exposure. Of course, an occupational exposure study would be useful for identifying urinary metabolites, but we didn't have access to these types of samples.

There is no assessment of interspecies variability of fipronil metabolism either quantitative or qualitative. Knowing that such variability exists as shown in rat and sheep (Leghait et al. Toxicol Lett. 2010 May 4;194(3):51-7.), information should be provided to ascertain the fact that rat is relevant to human.

Interspecies variability is not relevant to the scope of this study. No changes were made.

Minor Comments:

Line 72: Leghait et al works about fipronil thyroid disruption and hepatic effects on metabolism in rats should be mentioned (Toxicology. 2009 Jan 8;255(1-2):38-44). Moreover authors should specify that hepatic metabolism is not well documented in the literature.

Again, this is interesting but, beyond the scope of the paper.

Line 92: Authors should generalize this sentence to "biological matrix" leads to "matrix effect due to high concentration of endogenous chemicals", endogenous compounds are not only interfering in human samples but also in animal serum samples.

We agree with the reviewer that this is true in human samples; however, in dosed animal samples there is so much chemical of interest relative to the endogenous chemicals that matrix is generally not an issue. No changes were made.

Line 125: 5 mg/kg/Day cannot be considered as a low dose of fipronil, author should correct by (dose 1 or lowest dose) for 5 mg/kg/Day and (dose 2 or highest dose) for 10 mg/kg/Day. Authors should explain why they used these 2 doses.

Per the reviewer's suggestions, throughout the paper as appropriate we changed low to "lowest" and high to "highest" dose for 5 and 10 mg/kg bw, respectively. We cite the Freeborn et al. paper for specifics on why these doses were chosen. Further discussion on this matter is beyond the scope of the paper.

Line 133: Is there a questionnaire for human sample collection to know if the individuals were in contact with pets or gardening during the previous weeks? Authors should document how was evaluated the "no known fipronil exposure". Information can be crucial for discussion about human fipronil sulfone exposure. Because fipronil sulfone is a persistent metabolite in the organism (half time life estimated to 200 Hr).

Although this information would be nice to have, no questionnaire came with these samples, as they were samples of convenience. This would be a good idea for a follow-up study on fipronil source identification though.

What we mean by "no known exposure" is that we do not know what the study participants were exposed to, as we don't know occupation, habits, hobbies, etc.

As suggested by the reviewer, information on half-life *in rodents* from the manuscript by Mohamed et al. was added to the introduction on line 74.

Line 188: Why working with 6 cc cartridges for urine sample (5-12 mL), which need high volume loadings, instead of 3 cc cartridges which have been developed for serum samples?

No changes were made, but for the reviewer:

We had a clogging issue, since urine was diluted in 20 mL of DI water, and we needed a bigger cartridge.

§ 3.5 (line 333): Fipronil sulfone is the main serum metabolite of fipronil in human or rodent. It is well described in the literature and as so can be considered as a "known" biomarker.

As the reviewer suggested, the word putative was removed from line 331. However, the only human data available are two studies, one on occupationally exposed workers and one on an acute poisoning. This is the first study to demonstrate this biomarker's utility in samples from the general population.

§ 4 (line 303-308): Authors should explain the use of these 2 dosing regimen for urinary metabolites identification. Roques et al. works (Toxicol Sci. 2012 Dec;130(2):444-5), concluded that a dosing regimen of 1.5 mg/kg/D of fipronil for 14 days increase fipronil biotransformation rate into sulfone (Toxicol Sci. 2012 Dec;130(2):444-5). Authors should have considered this information to establish their dosing regimen. Comparing urinary metabolites obtained with a high dose (5 or 10 mg/kg/D for 14 days) and a low dose (estimated from mean occupational exposure study, for example) would be more judicious to evaluate the relevance of identified urinary biomarkers of fipronil regarding reported exposure scheme in human.



As above, this is beyond the scope of the study, since no toxicology work was undertaken in this effort, and relevant citations are given. The reviewer clearly has an in depth understanding of the fipronil literature, and we thank him/her for the additional information. Dosed animal studies are generally above human exposure levels, so extrapolation is always an issue.

SI table 3: This table is useless and very difficult to understand. Moreover, there are inconsistencies between 95% column and Max column (line 1 and 4).

We altered the table (SI Table 3 in the revised manuscript line 519) to make it more useful. Thank you for pointing out the inconsistencies.

SI Table 4: the column "Numbers of samples" do not correspond to the sum of the "detects" and "non-detects" column.

The previous SI table 4 was corrected and moved to the body of the text (Table 3 line 335 in the revised manuscript). Thank you for pointing this out.

--

#### EDITOR COMMENTS:

I strongly agree with Reviewer #2's comment on method validation. Please provide more details in the revised manuscript.

In responding to the comments of the reviewers and the editor we included new information on the validation of the method (r-squared and signal-to-noise ratio of blanks compared to the lowest working standard curve sample). High and low QA/QC samples were already in the text for rodent and human samples to address precision validation questions. In addition the text discussed replicate precision (~5-10% of sample) that were run in each analytical batch. As a whole this data shows good precision and accuracy for both rodent and human samples. However, due to the scope of our study, the method validation in human samples was more pertinent as we used rodent samples for metabolite discovery exclusively.

Please use  $\mu$ L instead of uL throughout the text Line 384: reference missing (ENREF 13)

Suggestions as noted were changed. Thank you for your careful consideration of this work.

#### Additional changes:

After careful consideration of the reviewer's comments on our statistical treatment of the data, we altered Figure 2 and included median estimated concentration rather than mean concentration of the Herin et al., study. We noted the data in the occupationally exposed worker study was log-normally distributed, and thus the mean was not appropriate. We used a recent publication from Pleil et al., 2014 (reference added) for this calculated median concentration using the published values in Herin et al. Some additional text was added to the manuscript (line 390-397) addressing this change.

1 Identification of fipronil metabolites by time-of-  
2 flight mass spectrometry for application in a human  
3 exposure study

4 *Rebecca.L. McMahan<sup>a</sup>, Mark J. Strynar<sup>b\*</sup>, Sonia Dagnino<sup>a</sup>, David W. Herr<sup>c</sup>, Virginia C. Moser<sup>c</sup>,*  
5 *Stavros Garantziotis<sup>d</sup>, Erik M. Andersen<sup>b</sup>, Danielle L. Freeborn<sup>c</sup>, Larry McMillan<sup>e</sup>, Andrew B.*  
6 *Lindstrom<sup>b</sup>*

7 <sup>a</sup>ORISE fellow at the United States Environmental Protection Agency, National Exposure  
8 Research Laboratory, Research Triangle Park, North Carolina

9 <sup>b</sup>United States Environmental Protection Agency, National Exposure Research Laboratory,  
10 Research Triangle Park, North Carolina

11 <sup>c</sup>National Health and Environmental Effects Research Lab, U.S. Environmental Protection  
12 Agency, Research Triangle Park, North Carolina

13 <sup>d</sup>National Institute for Environmental and Health Sciences, Research Triangle Park, North  
14 Carolina

15 <sup>e</sup>National Caucus and Center on Black Aged Employee, U.S. Environmental Protection Agency,  
16 National Exposure Research Laboratory, Research Triangle Park, North Carolina

17 \*CORRESPONDING AUTHOR:

18 Phone: (919)541-3706

19 Address: 109 TW Alexander Dr. Durham, NC 27705

20 Email: strynar.mark@epa.gov

21

22 ABSTRACT

23 Fipronil is a phenylpyrazole insecticide commonly used in residential and agricultural  
24 applications. To understand more about the potential risks for human exposure associated with  
25 fipronil, urine and serum from dosed Long Evans adult rats (5 and 10 mg/kg bw) were analyzed  
26 to identify metabolites as potential biomarkers for use in human biomonitoring studies. Urine  
27 from treated rats was found to contain seven unique metabolites, two of which had not been  
28 previously reported—M4 and M7 which were putatively identified as a nitroso compound and an  
29 imine, respectively. Fipronil sulfone was confirmed to be the primary metabolite in rat serum.  
30 The fipronil metabolites identified in the respective matrices were then evaluated in matched  
31 human urine (n=84) and serum (n=96) samples from volunteers with no known pesticide  
32 exposures. Although no fipronil or metabolites were detected in human urine, fipronil sulfone  
33 was present in the serum of approximately 25% of the individuals at concentrations ranging from  
34 0.1-4 ng/mL. These results indicate that many fipronil metabolites are produced following  
35 exposures in rats and that fipronil sulfone is a useful biomarker in human serum. Furthermore,  
36 human exposure to fipronil may occur regularly and require more extensive characterization.

37 Keywords: Fipronil, LC/TOF, Biomarker, Human Exposure, Metabolism

38 ABBREVIATIONS

39 DI: Deionized

40 ESI: electrospray ionization

41 GABA: gamma-aminobutyric acid

42 GSD: geometric standard deviation

43 HPLC: high performance liquid chromatography

44 LC: liquid chromatography

45 LLOQ: lower limit of quantitation

46 MS: mass spectrometry

47 NIEHS: National Institute for Environmental Health Sciences

48 QC: quality control

49 Q-TOF: quadrupole time-of-flight

50 % RSD: Percent Relative Standard Deviation

51 SD: standard deviation

52 SPE: solid phase extraction

53 TOF: time-of-flight

54 UPLC: ultra performance liquid chromatography

55 US EPA: United States Environmental Protection Agency

56

57 1. INTRODUCTION

58 Fipronil (Figure 1) is a phenylpyrazole broad-spectrum insecticide that is registered for use in  
59 residential settings as part of ant and cockroach baits and gels and termite control products;  
60 veterinary applications such as spot treatment flea and tick control products for dogs and cats;  
61 ornamental turf applications such as fire ant control; and agricultural applications such as pest  
62 control on potato crops<sup>1</sup>. When initially produced, fipronil was the first insecticide to act by

63 targeting the gamma-aminobutyric acid (GABA) receptor and has favorable selective toxicity  
64 towards insects rather than mammals<sup>2-4</sup>.

65 A 1997 report indicated that 480 tons of fipronil were produced per year by Rhone Poulenc,<sup>5</sup>  
66 and a more recent EPA report indicated that between 1998 and 2008 usage averaged 150,000  
67 pounds of active ingredient per 1.5 million acres<sup>1</sup>. Widespread fipronil use has led to  
68 contamination of water and soil (1-158 ng/L of parent or environmental degradate) in several  
69 states including, but not limited to Alabama, Georgia, California, Louisiana, and Indiana<sup>6, 7</sup>.  
70 Perhaps as a result of this contamination, fipronil has been implicated as one of the chemicals  
71 associated with the colony bee collapse<sup>8</sup>.

72 Because little was found in the peer-reviewed literature about the disposition of fipronil,  
73 Cravedi et al. (2013) performed a thorough study on the metabolism, distribution, and  
74 elimination of fipronil in rats and showed that fipronil is primarily converted to fipronil sulfone  
75 (M1 Figure 1), a more persistent metabolite (estimated half-life is 208 hours in rodents)<sup>9</sup> which  
76 was stored mainly in adipose tissue and adrenals<sup>10</sup>. In addition, fipronil has been associated with  
77 thyroid disruption<sup>11</sup>, endocrine disruption<sup>12</sup>, and neurotoxic effects<sup>13</sup> in rats which has led to  
78 concern about the potential for human health effects in the last decade.

79 The effects of acute human exposure to fipronil include headache, dizziness, vomiting, and  
80 seizures<sup>9, 10</sup>. Information on the effects of chronic exposure is limited, but the US EPA has  
81 classified fipronil as a possible human carcinogen based on data that shows an increase of  
82 thyroid follicular cell tumors in both sexes of the rat<sup>14</sup>. Vidau et al. (2011) also concluded that  
83 fipronil has the potential to cause apoptosis by uncoupling oxidative phosphorylation at  
84 relatively low concentrations (5-10  $\mu$ M) in human cell lines,<sup>15</sup> and a case of acute human self-  
85 poisoning with fipronil has demonstrated that fipronil levels can remain elevated in serum for

86 days after exposure, and that fipronil sulfone was the primary metabolite<sup>9</sup>. A previous study also  
87 showed that fipronil sulfone is the predominant metabolite in human liver microsomes via  
88 cytochrome P-450 oxidation<sup>16</sup>.

89 Although, one occupational exposure study of workers ( $n=159$ ) at a fipronil production facility  
90 reports a mean fipronil sulfone serum level of 7.8 (SD = 7.7) ng/mL,<sup>17</sup> very little is known about  
91 human exposure to fipronil in the general population<sup>9, 15, 17</sup>. This may be because human samples  
92 can be difficult to obtain and analyze due to high concentrations of endogenous chemicals and  
93 significant matrix effects which make the identification of metabolites difficult. The specific  
94 objectives of the study were to develop a unique workflow where dosed animal samples were  
95 used to identify potential serum/urine biomarkers via time-of-flight mass spectrometry which  
96 were subsequently evaluated in serum and urine of a group of volunteers from North Carolina to  
97 assess exposure.

98

## 99 MATERIALS AND METHODS

100 **2.1 Chemicals.** Unlabeled fipronil (5-amino-1-[2,6-dichloro-4-(trifluoromethyl)-phenyl]-4-  
101 (trifluoromethylsulfinyl)-1H-pyrazole-3-carbonitrile, >99%) and its metabolites: fipronil  
102 sulfone (5-amino-1-[2,6-dichloro-4-(trifluoromethyl)-phenyl]-4-[(trifluoromethyl)sulfonyl]-1H-  
103 pyrazole-3-carbonitrile, >99%), fipronil sulfide (5-amino-1-[2,6-dichloro-4-(trifluoromethyl)-  
104 phenyl]-4-[(trifluoromethyl)thio]-1H-pyrazole-3-carbonitrile, 98%), fipronil amide (5-amino-1-  
105 [2,6-dichloro-4-(trifluoromethyl)-phenyl]-4-[(trifluoromethyl)thio]-1H-pyrazole-3-carboxamide,  
106 >99%), and monochloro fipronil (5-amino-1-[2-chloro-4-(trifluoromethyl)-phenyl]-4-  
107 [(trifluoromethyl)sulfinyl]-1H-pyrazole-3-carbonitrile, >97%) were procured as solid analytical  
108 standards from the pesticide repository through the US EPA (Fort Meade, MD, USA). These five

109 analytical standards were prepared as a mixture in acetonitrile and used for all subsequent  
110 matrix-matched standard curves. The internal standard fipronil des-F<sub>3</sub> (see supporting  
111 information for structure) (5-amino-1-[2,6-dichloro-4-(trifluoromethyl)-phenyl]-4-  
112 (methylsulfinyl)-1-H-pyrazole-3-carbonitrile, 99%, 0.1 ng/μL in Acetonitrile) was ordered from  
113 Crescent Chemical Company (Islandia, NY, USA).

114 Acetonitrile and methanol (B&J Brand HighPurity Solvent) were purchased from Honeywell  
115 Burdick & Jackson (Muskegon, MI, USA) and ammonium acetate from Sigma Aldrich (St.  
116 Louis, MO, USA). Deionized water was generated in house from a Barnsted Easypure UV/UF  
117 (Dubuque, IA, USA) coupled with activated charcoal and ion exchange resin canisters.

118

119 **2.2 Animals.** This study was part of an investigation of the neurotoxic effects of fipronil in  
120 **rodents**<sup>18, 19</sup>. The animal facility is accredited by the American Association for Accreditation of  
121 Laboratory Animal Care International, and all protocols were approved by the National Health  
122 and Environmental Effects Research Laboratory Institutional Animal Care and Use Committee at  
123 the United States Environmental Protection Agency. Male Long Evans rats (60-90 days old)  
124 were acquired from Charles River Laboratories (Wilmington, MA). Animal husbandry details  
125 are provided in the Supporting Information. Animals were dosed **daily** by oral gavage at either 5  
126 (lowest dose) or 10 (highest dose) mg/kg with fipronil suspended in corn oil (1 mL/kg) every 24  
127 hours for two weeks. Control rats were gavaged with corn oil only. Six hours after the 14<sup>th</sup> dose,  
128 rats were euthanized. Trunk blood (2 mL) was collected in tubes without anticoagulant and  
129 stored on ice for 1-1.5 h.. The samples were centrifuged at 1300 × g for 30 min. at 4° C. The  
130 serum was collected, frozen on dry ice, and stored at -80 °C until analysis. Urine was collected in

131 a syringe either from voids on a clean table or via bladder puncture and transferred to a micro-  
132 centrifuge tube, immediately frozen on dry ice, and stored at -80 °C until analysis.

133 **2.3 Human Samples.** Matched human urine ( $n=84$ ) and serum ( $n=96$ ) samples, from  
134 individuals with no known fipronil exposure, were collected by the National Institute for  
135 Environmental and Health Sciences (NIEHS protocol number 10-E-0063) between April and  
136 June 2011. The human samples were simply a sample of convenience and were not meant to be  
137 representative of a specific population. The urine collected was a spot sample and was not  
138 concentrated or representative of a specific sampling period. Volunteers were anonymous, and  
139 no personally identifiable information was provided. The samples were from male and female  
140 volunteers of various ethnicities between 19 and 73 years of age who live in the Raleigh-Durham  
141 area of North Carolina (Table 1). Although 100 volunteers participated in the study, several urine  
142 and serum samples were not included due to an insufficient volume for analysis.

143 **Table 1.** Human demographic data for [the 100 volunteers](#).  
144

|       | Sex  |        | Age   |       |       |       | Race  |       |       |       |
|-------|------|--------|-------|-------|-------|-------|-------|-------|-------|-------|
|       | Male | Female | 19-33 | 34-48 | 48-62 | 62-76 | Asian | Black | White | Other |
| 145 % | 30   | 70     | 29    | 30    | 33    | 8     | 3     | 32    | 63    | 2     |

146  
147  
148 **2.4 Extraction Protocols.** Samples were extracted in a manner that optimized recovery and  
149 reproducibility while reducing matrix interference. Animal samples were small volumes that did  
150 not require solid phase extraction (SPE). However, a protocol involving SPE was performed with  
151 the human samples to reduce matrix interference. Sample extraction protocols for biologicals are  
152 described below. More information on methods development for human samples can be found in  
153 the Supporting Information. Rat serum samples were first analyzed by liquid  
154 chromatography/time-of-flight mass spectrometer (LC/TOF-MS) in order to identify any  
155 metabolites. Human samples were then analyzed by liquid chromatography/triple-quadrupole



156 mass spectrometer (LC/triple-quad) for quantification of metabolites for which analytical  
157 standards were possessed. LC/quadrupole/time-of-flight mass spectrometry (LC/Q-TOF) was  
158 used for structure elucidation of unknown metabolites.

159 **2.5 Rat serum.** Rat serum (25  $\mu$ L) was denatured with 100  $\mu$ L of 0.1 M formic acid and  
160 precipitated with 1 mL of a cold acetonitrile solution spiked with the internal standard (fipronil  
161 des-F<sub>3</sub>, 25 ng). The sample was then centrifuged for 5 minutes at 12500  $\times$  g. An aliquot of the  
162 supernatant was mixed 50:50 with 10 mM ammonium acetate buffer, and analyzed via LC/TOF  
163 and LC/triple-quad.  $n=9$  for highest dose (10 mg/kg/day) ;  $n=10$  for low dose (5 mg/kg/day);  
164 and  $n=11$  for control animals, which were treated with vehicle. Quantitation was performed for  
165 fipronil and fipronil sulfone. The results of the quantitation are shown in the supporting  
166 information.

167 **2.6 Rat urine.** Rat urine (100  $\mu$ L) was precipitated with 900  $\mu$ L of cold acetonitrile and  
168 centrifuged for 8 minutes at 12500  $\times$  g. An aliquot of the supernatant was extracted and mixed  
169 50:50 with 10 mM ammonium acetate buffer before LC/MS analysis.  $n=3$  for highest dose (10  
170 mg/kg/day);  $n=4$  for low dose (5 mg/kg/day); and  $n=3$  for control animals. Quantitation was only  
171 performed for the fipronil sulfone metabolite, as standards were not available for other  
172 metabolites. Quantitation specifics can be found in the Supporting Information. Fipronil sulfone  
173 concentrations in rat urine were used to approximate the relative concentrations of the other  
174 observed metabolites.

175 **2.7 Human serum.** Human serum (200  $\mu$ L;  $n=96$ ) was denatured with 20  $\mu$ L of a 0.1 M  
176 formic acid solution spiked with internal standard (fipronil des-F<sub>3</sub>, 5 ng) and precipitated with 2  
177 mL of cold acetonitrile. The sample was centrifuged for 10 minutes at 12,500  $\times$  g and  
178 concentrated using solid phase extraction (SPE) using an Oasis 3cc HLB cartridge (Waters

179 Corporation, Milford, MA). SPE cartridges were conditioned with 3 mL of methanol and 3 mL  
180 of ultrapure water, samples were loaded, washed with 3 mL of 95:5 water/acetonitrile solution,  
181 then eluted with 3 mL of acetonitrile. The eluate was evaporated under N<sub>2</sub> at 40° C until  
182 approximately 200 µL remained. The concentrated solution was mixed 50:50 with 10 mM  
183 ammonium acetate buffer and analyzed via LC/TOF and LC/triple-quad [for all compounds listed](#)  
184 [in the chemical section](#). In order to determine the concentration of compounds of interest, a  
185 seven-point matrix-matched (blank calf serum-Life Technologies-Gibco®, Grand Island, NY)  
186 extracted standard curve from 0.1-50 ng/mL, along with a method blank (DI water) and a matrix  
187 blank was run with the human serum samples. The lowest value on the standard curve (0.1  
188 ng/mL) was considered the lower limit of quantitation (LLOQ).

189 **2.8 Human urine.** Human urine (5-12 mL; *n*=84) was precipitated with 1 mL of acetonitrile  
190 and concentrated using the SPE method described above with an Oasis 6cc HLB cartridge with  
191 the exception that cartridges were conditioned with 5 mL of methanol and 5 mL of ultrapure  
192 water, samples were loaded, washed with 5 mL of 95:5 water/acetonitrile solution, then eluted  
193 with 5 mL of acetonitrile. The eluate was evaporated under N<sub>2</sub> at 40° C until approximately 1 mL  
194 remained. The concentrated solution was mixed 50:50 with 10 mM ammonium acetate buffer in  
195 an LC vial and analyzed by LC-TOF/MS (*n*=84) [for all compounds listed in the chemicals](#)  
196 [section, as well as for any unknown metabolites](#). Note that several urine samples were excluded  
197 due to insufficient volume.

198 **2.9 Analytical Instrumentation.** Targeted analyses (LC/triple-quad) were carried out using an  
199 Agilent 1100 HPLC (Agilent Technologies, Palo Alto, CA) interfaced with a Sciex 3000 triple  
200 quadrupole mass spectrometer (Applied Biosystems/MDS Sciex, Foster City, CA) fitted with an  
201 electrospray ionization source (ESI) operated in the negative ionization mode. Compounds

202 contained in the LC/triple-quad method (fipronil, fipronil sulfone, fipronil sulfide, fipronil  
203 amide, and monochloro fipronil) were optimized on a compound specific basis. Information  
204 regarding transitions are included in the Supporting Information.

205 The HPLC system consisted of a Phenomenex Luna C18 column (50 x 3 mm, 5  $\mu$ m; Torrance,  
206 CA, USA) with a Security-guard guard column (Phenomenex). The method consisted of the  
207 following: 0.4 mL/min flow rate which increased to 0.75 mL/min at time=2 min; temperature: 30  
208  $^{\circ}$ C; mobile phases – A: ammonium acetate buffer (0.2 mM) and DI water:methanol (95:5, v/v),  
209 and B: ammonium acetate buffer (0.2 mM) and acetonitrile:DI water (95:5, v/v); gradient: 0-2  
210 min 50% A and 50% B; 2.1-4 min, a linear gradient from 50:50 A:B to 10:90 A:B; 4-6 min 10%  
211 A and 90% B; 6.1-10 min re-equilibration to 50% A and 50% B.

212 Non-targeted analyses (LC/TOF) were carried out using an Agilent 1100 HPLC (Agilent  
213 Technologies, Palo Alto, CA) interfaced with an Agilent 6210 Time-of-Flight (TOF) mass  
214 spectrometer fitted with an electrospray ionization source operated in the negative ionization  
215 mode at 120 Volts. Any drift in the mass accuracy of the TOF was continuously corrected by  
216 infusion of two reference compounds (purine [ $m/z$  = 119.0363] and hexakis (1H, 1H, 3H-  
217 tetrafluoroproxy) phosphazene [ $m/z$  = 966.0007]) via dual-ESI sprayer.

218 The HPLC method consisted of a Zorbax Eclipse Plus C18 column (2.1  $\times$  50 mm, 3.5  $\mu$ m;  
219 Agilent Technologies, Palo Alto, CA) fitted with a Phenomenex guard column (Torrance, CA).  
220 The method consisted of the following: 0.2 mL/min flow rate; at 30  $^{\circ}$ C; mobile phases: A:  
221 ammonium formate buffer (0.4 mM) and DI water:methanol (95:5 v/v), and B: ammonium  
222 formate (0.4 mM) and methanol:DI water (95:5 v/v); gradient: 0-5 min a linear gradient from  
223 50:50 A:B to 100% B; 5-15 min, 100% B; 15-18 min re-equilibration to 50% A and 50% B.

224 **2.10 Identification of Spectral Features.** The TOF-MS system has proprietary software that  
225 can be used in non-targeted analyses to help identify compounds that are specific to a treatment  
226 group or a specific experimental condition. For example, to identify potential biomarkers of  
227 fipronil exposure, control and dosed animal samples are analyzed, and molecular features  
228 (identifiable peaks) were first extracted according to user specified criteria (e.g., minimum peak  
229 height, area count). The two groups of extracted features were then compared using The Mass  
230 Profiler software, which singles out only those compounds that are found in the dosed group.  
231 This collection of compounds can be thought to represent either the parent compound,  
232 metabolites of the parent, or specific biological responses that are attributable to the treatment  
233 administered.

234 The exact monoisotopic mass of each of these "treatment only" features was then used to  
235 generate a ranked list of possible chemical formulae for each unknown. The numerical ranking  
236 is based on the difference between the calculated and measured mass, the isotopic abundance and  
237 the isotope spacing. If authentic standards are available, the identity of a proposed feature can be  
238 confirmed using chromatographic retention time, exact monoisotopic mass, and isotopic  
239 distribution.

240 Fipronil is an interesting and somewhat unique compound because it contains six fluorine  
241 atoms and two chlorine atoms, that result in a significant negative mass defect (435.93869 Da,  
242 with the  $[M-H]^-$  ion seen in negative ionization mode being 434.9314  $m/z$ ) which is preserved in  
243 most of its metabolic products to the extent that the F and Cl atoms are retained<sup>20</sup>. Moreover, the  
244 isotopic spacing between the Cl isotopes (<sup>35</sup>Cl [75.77%] and <sup>37</sup>Cl [24.23%]) leads to a distinctive  
245 isotopic pattern that aids greatly with identification (SI Figure 2). Both of these characteristics  
246 were useful in identifying fipronil-related metabolites.

247 Metabolites that were identified using the LC/TOF instrument described above were then  
248 investigated further using an Agilent 1200 HPLC system fitted with a 6250 quadrupole time-of-  
249 flight mass spectrometer (Q-TOF) (Agilent Technologies, Palo Alto, CA) using the same LC  
250 conditions as previously described. The LC/Q-TOF allowed fragmentation at various collision  
251 energies of metabolites of interest which helped with structure elucidation.

252 **2.11 Quality Assurance/Control.** For each analysis, method and matrix blanks were  
253 evaluated for contamination or background levels of the compounds of interest. The LLOQ was  
254 determined as the concentration of the lowest working standard, which back-predicted within  
255 30% of a theoretical value. The LLOQ in the quantitative human serum experiments was  
256 validated by calculating signal-to-noise ratios for the 451-415  $m/z$  transition relative to a method  
257 blank. R-squared values for all quantitative procedures were monitored to ensure predictability.  
258 Three randomly chosen samples were replicated in each quantitative experiment to ensure  
259 consistency within the data sets. Parent-daughter ratios should be consistent, and ratio  
260 monitoring is a robust way to confirm the presence of a specific compound. Therefore, in the  
261 targeted screening of samples, the ratio between the primary and secondary parent-daughter  
262 transition was monitored to confirm the presence of each compound in the MS method. High and  
263 low concentration quality control (QC) samples containing the fipronil mixture of five analytical  
264 standards described in the *Chemicals* section were run with each batch of human serum samples  
265 to ensure analytical precision and accuracy.

266

### 267 3. RESULTS

268 **3.1 Quality Assurance/Control.** All lab prepared target and non-target analysis blanks and  
269 control samples were below the respective LLOQ for compounds of interest in all experiments.

270 Validation of the LLOQ in the human serum quantitative experiments showed that the lowest  
271 curve point differed from the method blank (signal-to-noise ratio for method blank =  $3 \pm 1$ ;  
272 signal-to-noise ratio for 0.1 ng/mL standard =  $20 \pm 12$ ). All r-squared values were greater than  
273 0.99, which ensured predictability. All replicates for all experiments had a relative standard  
274 deviation of <15%. For all targeted analyses, the ion ratios between the primary and secondary  
275 parent-daughter transitions were consistent for all standard compounds and those observed in  
276 unknown samples (ion ratio mean  $\pm 20\%$ ). All QC samples (high and low) were  $100\% \pm 15\%$  of  
277 the nominal values.

278 **3.2 Urine from Treated Rodents.** The urine from rodents treated for 14 days with fipronil  
279 was analyzed for biomarkers of exposure via non-targeted analysis. As described above,  
280 molecular features (significant chromatographic peaks) were extracted from analytical runs of  
281 both dosed and control animals, and The Mass Profiler software was used to isolate those  
282 features that were unique to the dosed animals. The most plausible candidate biomarkers were  
283 those compounds with the signature isotope pattern of two chlorine atoms (SI Figure 2) and/or  
284 significant negative mass defects indicative of fluorine and chlorine atoms. Seven high  
285 abundance peaks fitting these criteria were identified, and the exact monoisotopic mass of each  
286 was used to generate a ranked list of plausible formulae and corresponding structures. We  
287 tentatively assigned compound identity according to known metabolic pathways (e.g., oxidation,  
288 sulfation, glucuronidation), the retention of negative mass defect and/or the isotopic pattern  
289 associated with chlorine, and consistency with results from previous studies. Information on the  
290 seven metabolites can be found in Table 2. Four of the compounds (M1, M2, M3, M5, and M6)  
291 were identified in previous studies<sup>10, 21</sup>, whereas two more (M4 and M7) are reported for the first  
292 time in this study (Figure 1). It should be noted that the spectral feature observed for the

293 glucuronide conjugate (M6) splits into two chromatographic peaks, most likely meaning that the  
294 glucuronide molecule adds to both the oxygen and the nitrogen atom (see Figure 1). We were  
295 unable to differentiate which peak corresponded to which structure, but one was formed  
296 preferentially. However, this spectral feature is not observed for the sulfate conjugate (M5).

297 To better characterize the structures of metabolites M4 and M7, the fragmentation patterns of  
298 the parent metabolites were analyzed via LC/Q-TOF. No useful information was gained about  
299 metabolite M4; however, the fragmentation pattern of metabolite M7 helped to predict a  
300 plausible structure. M7 structural information could be gleaned from looking at the exact masses  
301 of molecular fragments originating from the parent molecule. For example, if the mass of a CO<sub>2</sub>  
302 group is observed in the fragmentation pattern, it can be assumed that the molecule likely  
303 contained a carboxylic acid. Spectral information regarding this fragmentation pattern can be  
304 found in the Supporting Information (SI Figure 3).

305 Fipronil sulfone (M1) was confirmed by an authentic standard that has the same retention time,  
306 monoisotopic mass, ion fragmentation pattern, and isotope spacing. Rats in the 5 mg/kg/day  
307 dose-group had mean concentrations of fipronil sulfone of 24.1 (SD = 18.7) ng/mL, while the 10  
308 mg/kg/day group had 31.9 (SD = 13.1) ng/mL (SI Figure 1). If the fipronil sulfone  
309 concentrations are used to generate estimated relative response factors for other metabolites that  
310 do not have standards (assuming that all respond similarly within the TOF-MS), we estimate the  
311 relative concentrations of fipronil metabolites in dosed-rodent urine to be  
312 M6>M4>M5>M3>M7>M1>M2. The estimated concentrations of M2 and M6 are 30 and 2,000  
313 ng/mL respectively.

314 **Table 2.** LC/TOF characteristics of putative metabolites in rat urine.

| Metabolite            | Retention Time (mins) | Predicted Formula of parent                                                                   | Score of Predicted Formula | [M-H] <sup>-</sup> Measured Mass (m/z) | [M-H] <sup>-</sup> Calculated Mass (m/z) | Δ ppm | Monoisotopic Mass (m/z) |
|-----------------------|-----------------------|-----------------------------------------------------------------------------------------------|----------------------------|----------------------------------------|------------------------------------------|-------|-------------------------|
| M1 (Fipronil Sulfone) | 7.57                  | C <sub>12</sub> H <sub>4</sub> Cl <sub>2</sub> F <sub>6</sub> N <sub>4</sub> O <sub>2</sub> S | 99.63                      | 450.9266                               | 450.9263                                 | 0.67  | 451.9336                |
| M2                    | 7.3                   | C <sub>9</sub> H <sub>4</sub> Cl <sub>2</sub> F <sub>3</sub> N <sub>3</sub>                   | 93.50                      | 279.9665                               | 279.9662                                 | 1.07  | 280.9734                |
| M3                    | 1.62                  | C <sub>11</sub> H <sub>4</sub> O <sub>2</sub> N <sub>4</sub> Cl <sub>2</sub> F <sub>3</sub>   | 99.53                      | 350.9667                               | 350.9669                                 | 0.43  | 351.9742                |
| M4                    | 5.38                  | C <sub>10</sub> H <sub>4</sub> Cl <sub>2</sub> F <sub>3</sub> N <sub>3</sub> O <sub>2</sub>   | 98.63                      | 323.9565                               | 323.9560                                 | 1.54  | 324.9633                |
| M5                    | 1.4                   | C <sub>11</sub> H <sub>5</sub> Cl <sub>2</sub> F <sub>3</sub> N <sub>4</sub> O <sub>4</sub> S | 99.38                      | 414.9290                               | 414.9288                                 | 0.48  | 415.9361                |
| M6                    | 1.39                  | C <sub>17</sub> H <sub>13</sub> Cl <sub>2</sub> F <sub>3</sub> N <sub>4</sub> O <sub>7</sub>  | 98.74                      | 511.0036                               | 511.0041                                 | 0.98  | 512.0113                |
| M7                    | 5.38                  | C <sub>11</sub> H <sub>3</sub> Cl <sub>2</sub> F <sub>3</sub> N <sub>4</sub> O                | 98.93                      | 332.9564                               | 332.9563                                 | 0.30  | 333.9563                |

315

316

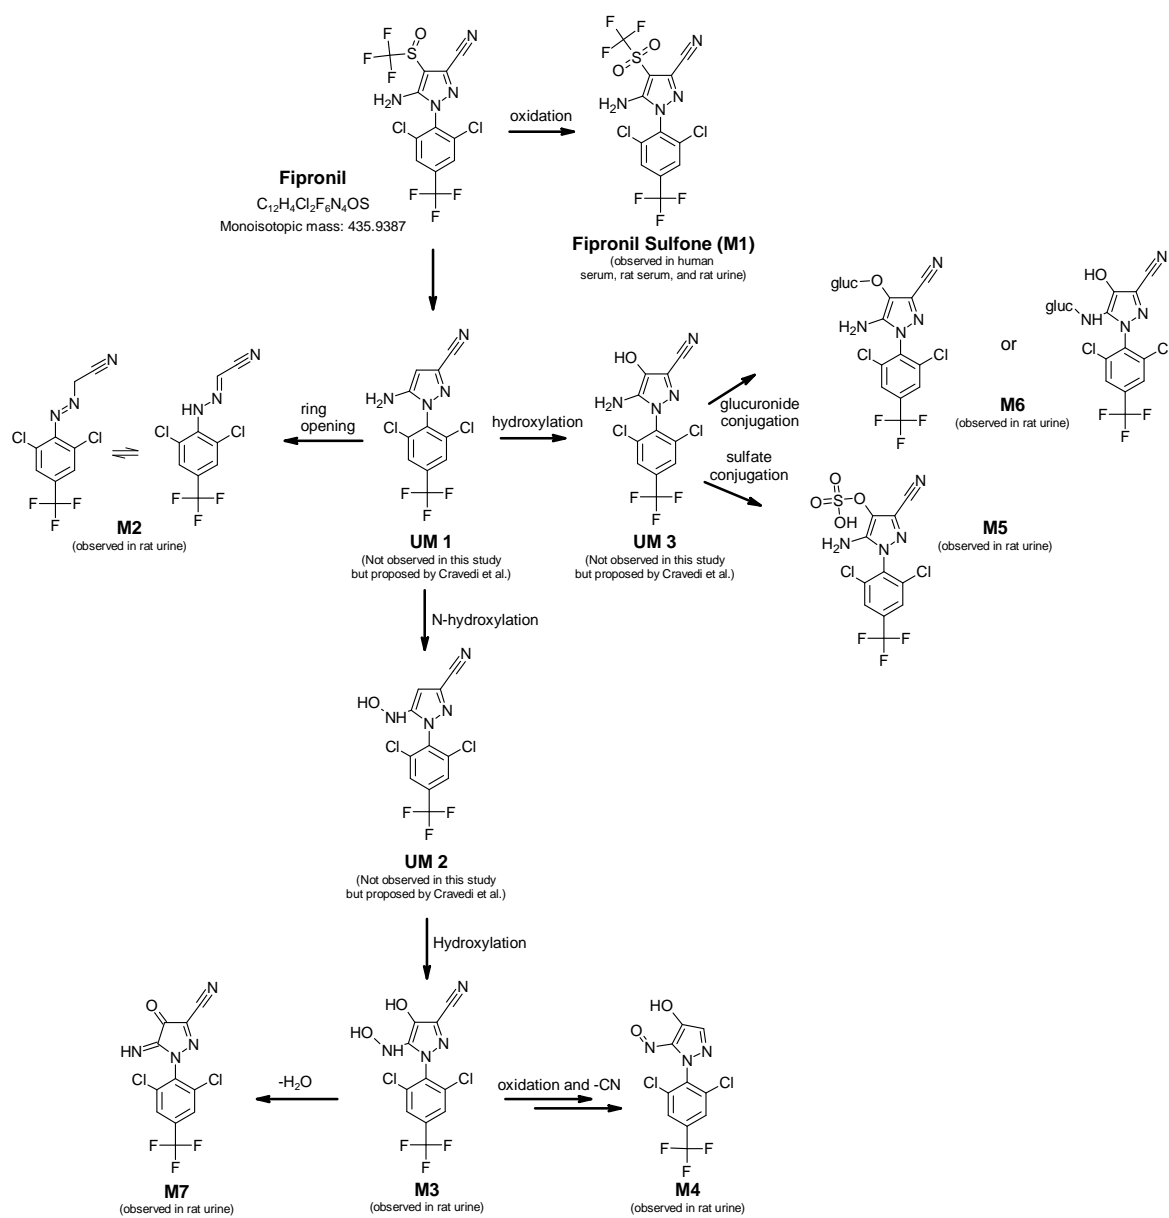

317



318

319 **Figure 1.** Proposed metabolic pathway of fipronil in the rat. M4 and M7 are proposed structures  
320 based on MS data, isotope distributions, and exact mass. M1, M2, M3, M5, and M6 were  
321 identified in rat urine. Unobserved metabolites labeled (UM) were not identified but are likely  
322 intermediates.

323

324 **3.3 Serum from treated rodents.** The serum from treated rats was analyzed for all suspected  
325 biological metabolites via LC-TOF to evaluate the presence of possible serum biomarkers. In our  
326 analysis we detected no additional metabolites other than small amounts of un-metabolized  
327 fipronil and fipronil sulfone which had been previously identified by several groups <sup>4, 22</sup>.  
328 Quantitative data for fipronil and fipronil sulfone in rat serum can be found in the Supporting  
329 Information.

330 **3.4 Human urine.** Urine samples (*n*=84) from volunteer North Carolina residents with no  
331 known exposures to fipronil or other pesticides were examined for M1-M7 (identified in rodent  
332 urine) and for all other plausible fipronil adducts or derivatives using the methods described  
333 above. No parent fipronil or any plausible metabolites were found in the human urine samples.

334 **3.5 Human serum.** Matched human serum samples (*n*=96) were analyzed for the metabolites  
335 observed in rat serum (fipronil and fipronil sulfone) by a targeted approach (LC/triple-quad,  
336 LOQ = 0.1 ng/mL). Only trace amounts of the parent fipronil were found in the human blood  
337 samples. However, fipronil sulfone (the biomarker identified in the rodent study) was detected in  
338 approximately 25% of the samples, at levels ranging from 0.1 to 3.9 ng/mL (Figure 2). [Table 3](#)  
339 [describes general trends in the data in terms of detects vs. non-detects.](#)

340

341 [Table 3](#) shows the number of detects vs. non-detects for each gender and race.

| Gender           | Detects | Non-Detects | Number of Samples |
|------------------|---------|-------------|-------------------|
| Male             | 7       | 12          | 29                |
| Female           | 17      | 67          | 67                |
|                  |         |             |                   |
| Race             | Detects | Non-Detects | Number of Samples |
| Caucasian        | 22      | 39          | 61                |
| African American | 1       | 29          | 30                |
| Asian            | 1       | 2           | 3                 |
| Other            | 0       | 2           | 2                 |

342

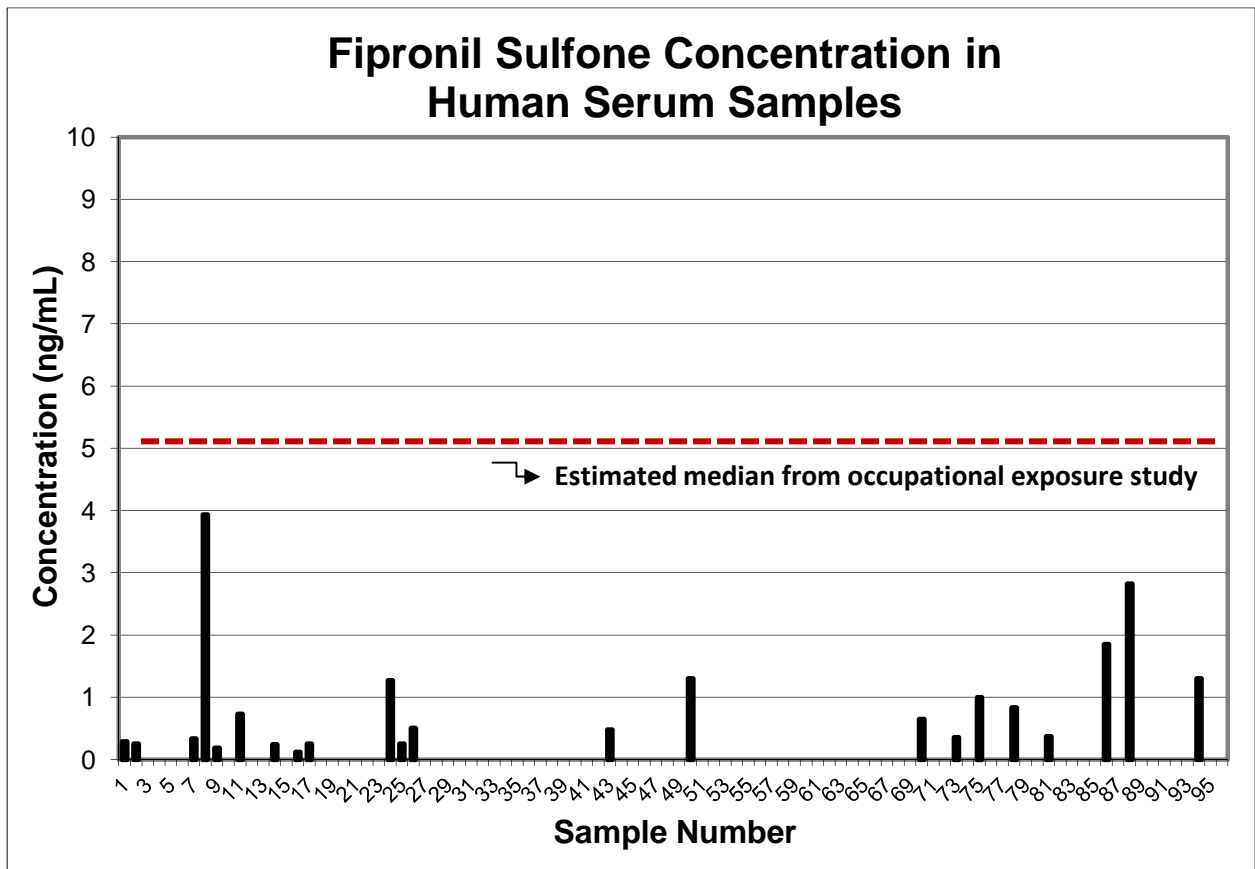

343

344 **Figure 2** shows fipronil sulfone concentrations in human serum\*. The red dotted line represents  
 345 the median calculated from an occupational exposure study<sup>17, 23</sup>.

346 \*n = 96, four samples were excluded due to insufficient volume.

347

348 4. DISCUSSION

349 This study demonstrates how advanced time-of-flight mass spectrometry techniques can be  
350 used to more fully describe the metabolism of xenobiotic compounds in treated-animal studies  
351 and how this knowledge can be applied in human biomonitoring studies to make relevant  
352 conclusions about human exposures to emerging compounds of concern. Our specific goal was  
353 to use the biomarkers identified from the dosed rodent work in the analysis of a set of human  
354 biological samples to characterize the rate of fipronil exposure in the general population.

355 In describing the metabolism of fipronil in rodents, our results were largely consistent with  
356 previous studies,<sup>10, 21, 24</sup> while also extending what is known about the basic metabolic process.  
357 Two novel metabolites observed in rat urine in this study which were not seen by Cravedi et al.  
358 (2013) can be attributed to differences in study design. Specifically, our Long Evans rats were  
359 dosed (5 or 10 mg/kg/day) for 14 days then sacrificed 6 hours after the last dose. In contrast,  
360 Cravedi et al. (2013) dosed acutely at 10 mg/kg and collected urine and serum every 24 h. over a  
361 72 h. period<sup>10</sup>. Differences between rat strain or length of dosing regimen may have made it  
362 possible to identify different products of fipronil metabolism, such as the pyrazole ring opened  
363 products or the highly oxidized heteroaromatic amine derivatives.

364 The proposed metabolic pathway in the rat and compound structures can be found in Figure 1.  
365 We propose that a new metabolite (M7) in rat urine, an imine, results from the loss of water from  
366 metabolite M3, which is a fipronil metabolite that is hydroxylated at both the carbon and the  
367 nitrogen. We also identified what is hypothesized to be nitroso compound (M4). We believe that  
368 M3 and M4 are formed from an unobserved hydroxyl amine intermediate (UM 2). The hydroxyl  
369 amine (M3) has been identified in this and in previous studies<sup>10</sup>, but to our knowledge this is the  
370 first report of a nitroso metabolite of fipronil in rat urine. Although the structure for metabolite  
371 M4 is only putative, heterocyclic aromatic amines are known to undergo biological oxidation to

372 form nitroso compounds. This process is mediated by cytochrome P-450 and NADPH<sup>25</sup>. Many  
373 heterocyclic amines are known carcinogens,<sup>26-30</sup> due to their ability to be hydroxylated and then  
374 form DNA adducts. The observation of N-hydroxylated fipronil metabolites in this and other  
375 rodent studies warrants further investigation of fipronil metabolism in humans and the resulting  
376 effects.

377 Noninvasive biomarkers like those present in urine, exhaled breath, hair, fingernails, etc. are  
378 optimal for use in human studies, and one intention of this study was to explore whether any of  
379 the urinary metabolites found in the rats could be used as biomarkers of exposure in humans.  
380 Studies with human liver microsomes have shown that fipronil is metabolized to fipronil sulfone  
381 *in vitro*, and Mohamed et al. (2004) have identified fipronil sulfone as a metabolite in humans  
382 acutely exposed to high doses<sup>9, 16</sup>. Aside from these, no publications comment on the disposition  
383 of fipronil in humans. In this study we analyzed human urine samples for any of the metabolites  
384 identified as possible biomarkers in rat urine. The absence of fipronil and its metabolites in the  
385 human urine samples was undoubtedly related to many factors. To start with, it is possible that  
386 most human elimination of these materials occurs via the feces, as is the case with rodents<sup>14, 24</sup>.  
387 Secondly, and perhaps more importantly, our study subjects were essentially volunteers from the  
388 Raleigh-Durham area of North Carolina with no known exposures to fipronil and/or any other  
389 similar pesticides. Identification of small amounts of unknown chemicals in urine from  
390 populations with no known exposure can be difficult due to the large amount of endogenous  
391 compounds found in the matrix. A more effective strategy would be to work with a group of  
392 individuals with higher exposure levels (preferably occupationally) to determine human urinary  
393 metabolites. Despite negative findings with the human urine samples, 25% of the serum samples

394 contained measureable amounts of fipronil sulfone (range 0.1 – 4 ng/mL), providing clear  
395 evidence that humans are regularly exposed to fipronil.

396 We compared our results to those from a study by Herin et al. where the serum from workers  
397 in a fipronil production facility was measured for fipronil and fipronil sulfone. The median  
398 serum concentration from the occupational exposure study was calculated from the mean ( $\mu$ ) and  
399 standard deviation ( $\sigma$ ) provided via a method by Pleil et al.<sup>23</sup> where the geometric mean is used  
400 to estimate the median which is equal to  $\mu/[1 + 0.5 \times(\sigma/\mu)^2]$ . Interestingly, the maximum  
401 concentration observed in this study (3.9 ng/mL) was only slightly less than the calculated  
402 median of 5.2 ( $\pm$  GSD = 2.4) ng/mL for the occupationally exposed workers<sup>17</sup> (see Figure 2).

403 The general population likely shares specific exposure routes. One of the most likely routes of  
404 exposure is contact with pets that have received applications of fipronil (i.e. Frontline® Plus) or  
405 have had contact with indoor/outdoor applications around the home. Notably, Morgan et al.  
406 (2008) concluded that family pets can act as vehicles for human exposure to the  
407 organophosphorous insecticides, such as diazinon<sup>31</sup>. Specifically, fipronil is widely used to  
408 control residential insect pests such as termites and fire ants outdoors where pets frequent,  
409 leading to transport of the material indoors. Furthermore, many flea and tick topical products  
410 contain approximately 10% fipronil and are applied directly to the skin and fur of dogs and cats,  
411 leading to human exposure to fipronil through direct contact with their pets. Dyk et al. (2012)  
412 used a fluorescent indicator to show that these fipronil residues are easily transferred from pets to  
413 humans by way of direct contact for one week following application<sup>32</sup>. According to estimates  
414 from the American Humane Association, up to 46% and 39% of US households keep dogs and  
415 cats, respectively. Use of fipronil containing products with these animals could conceivably  
416 result in some measurable human exposures. Ongoing efforts in our lab (data not shown) are

417 investigating domestic indoor sources of exposure that may be important, since local WWTP  
418 effluent is shown to contain fipronil and metabolites.

419 Although we felt the study was well-designed, it did have a few limitations. First, the fipronil  
420 sulfone metabolite may not be a specific biomarker for fipronil exposure, since it is known that it  
421 can undergo photochemical degradation<sup>2</sup> and its presence has been documented in environmental  
422 media by several reports,<sup>7, 33</sup> thus one could be exposed to either fipronil or the degradate. In  
423 addition our sample size was relatively small ( $n=100$ ). Furthermore, the number of detects was  
424 less than 30% of the total sample; which did not warrant a statistical analysis. More work is  
425 needed on a larger and more diverse sample before further conclusions can be drawn. Worth  
426 mentioning, however, was that approximately 92% of fipronil sulfone detections in human serum  
427 were from Caucasians, which represented only 63% of our samples. This result suggests that  
428 discrepancies between ethnicities may be present.

429 While the target of fipronil is insects, the two trifluoromethyl groups of fipronil may increase  
430 the compound's absorption and distribution upon accidental exposure by humans.  
431 Approximately 20-25% of drugs produced in the pharmaceutical industry contain at least one  
432 strategically incorporated fluorine atom (usually in the form of either one fluorine atom or a  
433 trifluoromethyl group) because fluorine can significantly impact lipophilicity and improve the  
434 bioavailability of orally administered drugs. Several studies have shown that the addition of  
435 fluorine, the most electronegative element, can decrease the pKa and therefore basicity of  
436 surrounding functional groups<sup>34, 35</sup>. Although the effect is not always predictable, this decreased  
437 basicity stabilized molecules in the harsh acidic conditions of the stomach and increases  
438 bioavailability<sup>36, 37</sup>. Another factor that affects the absorption and distribution of a molecule is  
439 lipophilicity. Compounds usually enter into cell membranes via passive transport (although

440 active transport is an alternate mechanism). Passive transport requires that the molecule is able to  
441 permeate the cell membrane, but also avoid entrapment by the lipid bilayer. The electron  
442 withdrawing capabilities of fluorine can, in some cases, be incorporated to tune a compound's  
443 lipophilicity and ease passive transport into cells<sup>38-40</sup>. Fipronil's presence in human serum  
444 demonstrated that the chemical is, in fact, absorbed by humans. Further, Hainzl et. al (1996)  
445 found that fipronil lost almost all activity in neurotoxicity studies on mice without the  
446 trifluoromethylsulfinyl functional group.<sup>2</sup> Metabolites of fipronil have also been found in many  
447 rat tissues, including brain cells<sup>2, 4, 10</sup>, demonstrating that even highly selective membranes are  
448 somewhat permeable to these chemicals. The fluorinated functional groups may increase  
449 fipronil's potency as an insecticide; however, they may also increase absorption and distribution  
450 of the potentially toxic compound in non-target organisms, such as humans. Considering that  
451 fipronil has been associated with endocrine disruption, neurotoxicity, and carcinogenicity<sup>12-15</sup>,  
452 accidental exposure and increased bioavailability may be problematic.

453 In conclusion, previously reported metabolites in rat urine and serum were confirmed, and two  
454 novel urinary metabolites have been proposed. The putative biomarkers determined in the rodent  
455 study were used in human serum analysis, where fipronil sulfone was found in approximately  
456 25% of serum samples from a convenient sample of North Carolina residents. Serum fipronil  
457 levels in our study suggest that environmental exposures to fipronil may be common, but likely  
458 lower than occupational exposures. Matched urine was also analyzed, but no fipronil or any of  
459 its metabolites were identified, which suggests that urine may not be an appropriate matrix for  
460 biomonitoring populations with no known exposure to fipronil. More extensive characterization  
461 of the metabolites produced in humans exposed to higher levels of fipronil, as well as the effects

462 from low but chronic exposure to fipronil is needed. Further investigations are also necessary to  
463 describe the sources of fipronil exposure and identify rates of exposure in other populations.

464

465

## 466 5. SUPPORTING INFORMATION

467 **5.1 Rodents** were housed in polycarbonate cages containing heat-treated hardwood chip  
468 bedding. Access to food (Purina 5008 Chow; Lab Diet/PMI Nutrition International, Richmond,  
469 IN) and tap water was provided *ad libitum*. Animals were allowed to acclimate to their  
470 surroundings in the animal colony for 5-7 days before beginning any tests. The animal colony  
471 was maintained at a temperature of  $22 \pm 2$  °C, with humidity at  $40 \pm 20\%$ , and a 12:12 hr  
472 light:dark cycle (light on at 6:00 a.m.).

473 **5.2 Recovery Experiment for Fipronil in Dosed-rat Serum.** Standard fipronil (200 ng) was  
474 added to a vial containing blank rat serum (100  $\mu$ L), along with 100  $\mu$ L of 0.1 M formic acid and  
475 1 mL of cold acetonitrile. The solution was centrifuged at  $12,500 \times g$ , and the supernatant was  
476 extracted. In a separate vial, blank rat serum was directly spiked with fipronil standard (200 ng).  
477 Both the supernatant and the control sample were mixed 50:50 with 10 mM ammonium acetate  
478 buffer and analyzed via LC/triple-quad. The fipronil recovery rate was 98%.

479 **5.3 Recovery Experiment for Fipronil in Spiked Human Serum.** A standard mix of fipronil  
480 metabolites (10 ng each metabolite) was added to a vial containing blank calf serum (200  $\mu$ L),  
481 along with 25  $\mu$ L of a 0.1 M formic/internal standard solution (fipronil des-F<sub>3</sub>, 10 ng) and 2 mL  
482 of acetonitrile. The solution was centrifuged at  $12,500 \times g$  and was extracted onto an Oasis 3cc  
483 HLB solid phase extraction cartridge. The solid phase extraction method consisted of



484 conditioning the cartridge with 3 mL of methanol followed by 3 mL of DI water; loading the  
485 sample; washing with 3 mL of 95:5 water:acetonitrile; and eluting with 3 mL of acetonitrile. The  
486 samples were evaporated under N<sub>2</sub> at 40 °C until 200 µL remained. In a separate vial (the control  
487 sample), only 200 µL of blank calf serum, 25 µL of the 0.1 M formic acid/internal standard  
488 solution and 2 mL of acetonitrile was added (no fipronil or metabolites), and this vial was also  
489 carried through the procedure, just as the experimental sample. The control sample was spiked  
490 with the standard mix of fipronil metabolites (10 ng/metabolite) after evaporation. All the  
491 samples were prepared 50:50 with 10 mM ammonium acetate buffer, and analyzed via LC/triple-  
492 quad (*n*=3). The results are shown below in SI Table 1.

493

494

495

496 **SI Table 1.** Human serum recovery experiment results.

| Compound            | Average % Recovery (± %RSD) |
|---------------------|-----------------------------|
| Fipronil            | 82 ±2.4                     |
| Fipronil sulfone    | 83 ±3.6                     |
| Fipronil sulfide    | 84 ±3.6                     |
| Fipronil amide      | 82 ±7.3                     |
| Monochloro fipronil | 85 ±3.5                     |

497

498

499 **5.4 Recovery Experiment for Fipronil in Spiked Human Urine.** A standard mix of fipronil  
500 metabolites (400 ng/metabolite) was added to a vial containing 10 mL of blank human urine and  
501 1 mL of acetonitrile/internal standard solution (fipronil des-F<sub>3</sub>, 33 ng). The solution was  
502 extracted onto an Oasis 6cc HLB solid phase extraction cartridge. The solid phase extraction  
503 method was the same as for human serum, except the elution step used 5 mL instead of 3 mL of  
504 acetonitrile. The solution was evaporated under N<sub>2</sub> at 40 °C until 1 mL remained. In the control

505 sample, 10 mL of blank human urine and 1 mL acetonitrile were added (no fipronil or  
506 metabolites), and this vial was also carried through the procedure, just as the experimental  
507 samples. After evaporation the control sample was spiked with the standard fipronil metabolite  
508 mixture (400 ng/metabolite). All samples were prepared 50:50 with 10 mM ammonium acetate  
509 buffer and analyzed via LC/triple-quad ( $n=3$ ). The results are shown below in SI Table 2.

510 **SI Table 2.** Human urine recovery experiment results.

| Compound            | Average % Recovery ( $\pm$ %RSD) |
|---------------------|----------------------------------|
| Fipronil            | 103 $\pm$ 5.8                    |
| Fipronil sulfone    | 100 $\pm$ 10                     |
| Fipronil sulfide    | 99 $\pm$ 7.0                     |
| Fipronil amide      | 104 $\pm$ 3.8                    |
| Monochloro fipronil | 101 $\pm$ 5.0                    |

511

512 **5.5 Quantitation of fipronil and fipronil sulfone in the serum of treated rodents.** Rat serum  
513 (25  $\mu$ L) was denatured with 100  $\mu$ L of 0.1 M formic acid and precipitated with 1 mL of a cold  
514 acetonitrile solution spiked with the internal standard (fipronil des-F<sub>3</sub>, 25 ng). The sample was  
515 then centrifuged for 5 minutes at 12500  $\times$  g. An aliquot of the supernatant was mixed 50:50 with  
516 10 mM ammonium acetate buffer, and analyzed via LC/TOF and LC/triple-quad.  $n=9$  for highest  
517 dose (10 mg/kg/day) ;  $n=10$  for lowest dose (5 mg/kg/day); and  $n=11$  for control animals, which  
518 were treated with vehicle. To determine the concentration of compounds of interest, a nine-point  
519 matrix-matched extracted standard curve from 10-5000 ng/mL, a method blank (DI water), and a  
520 matrix blank (blank rat serum) was run with the rat serum samples via LC/triple-quad. The  
521 lowest value on the standard curve (10 ng/mL) was considered the lower limit of quantitation  
522 (LLOQ). The results of the quantitation are shown in SI Table 3.

523

524 **SI Table 3. Mean, standard deviation, and 95% confidence interval for fipronil and fipronil**  
525 **sulfone in rat serum.**

| Compound | Dose Conc. (mg/kg bw) | LOQ (ng/mL) | Mean (ng/mL) | St. Dev. | 95% Conf. Int. |
|----------|-----------------------|-------------|--------------|----------|----------------|
| Fipronil | control               | 10          | 1.0 (<LLOQ)  | 3.0      | 1.8            |
| Sulfone  | control               | 10          | 2.5 (<LLOQ)  | 3.7      | 2.2            |
| Fipronil | 5                     | 10          | 8.9 (<LLOQ)  | 3.4      | 2.1            |
| Sulfone  | 5                     | 10          | 2424         | 193.3    | 119.8          |
| Fipronil | 10                    | 10          | 13.9         | 7.8      | 5.1            |
| Sulfone  | 10                    | 10          | 3548         | 511.9    | 334.4          |

526  
527 **5.6 Quantitation of fipronil sulfone in the urine of treated rodents.** Rat urine (100  $\mu$ L) was  
528 treated with 900  $\mu$ L of cold acetonitrile. The sample was then centrifuged for 8 minutes at  
529 12,500  $\times g$ , prepared 50:50 with 10mM ammonium acetate buffer, and analyzed via LC/triple-  
530 quad.  $n = 2$  for highest dose (10 mg/kg/day);  $n = 4$  for lowest dose (5 mg/kg/day); and  $n = 6$  for  
531 control animals. In order to determine concentration of compounds of interest, a seven-point  
532 extracted standard curve prepared in DI water from 10-5000 ng/mL, along with a method blank  
533 (DI water) was run with the experimental rat urine samples. SI Figure 1 shows median fipronil  
534 sulfone concentrations for rodents dosed with fipronil. The highest dose group had a mean  
535 concentration of 31.9 (SD = 13.1) ng/mL fipronil sulfone, while the lowest dose group had 24.1  
536 (SD = 18.7) ng/mL and the control animals had mean concentrations below the LLOQ.

537 The LC/triple quad used for the quantitation of fipronil sulfone was a Waters Acquity  
538 ultraperformance liquid chromatography system coupled with a Waters Quatro Premier XE triple  
539 quadrupole mass spectrometer (UPLC-MS/MS; Waters Corporation). A 20- $\mu$ L aliquot of each  
540 sample was injected onto an Acquity UPLC BEH C18 column (1.7  $\mu$ m, 2.1  $\times$  50 mm; Waters  
541 Corporation) that was maintained at 50  $^{\circ}$ C. The mobile phase consisted of solvent A: 2 mM  
542 ammonium acetate buffer with 5% methanol and solvent B: acetonitrile at a flow rate of 400  
543  $\mu$ L/min, starting with 75% solvent A for 30 s and then increasing to 90% solvent B at 3.5 min

544 and 100% solvent B at 3.6 min and held for 0.9 min. At 4.6 min the gradient was returned to  
545 60% solvent A and held until 6.0 min. Electrospray negative ionization was used in the mass  
546 spectrometer source. The capillary voltage was set at negative 0.4 kV, and the source  
547 temperature was 150 °C. The primary transition used for quantitation was 451.2 - 244.0 *m/z*, and  
548 two other transitions were monitored for confirmation, 451.2 to 281.9 *m/z* and 451.2 to 414.9  
549 *m/z*.

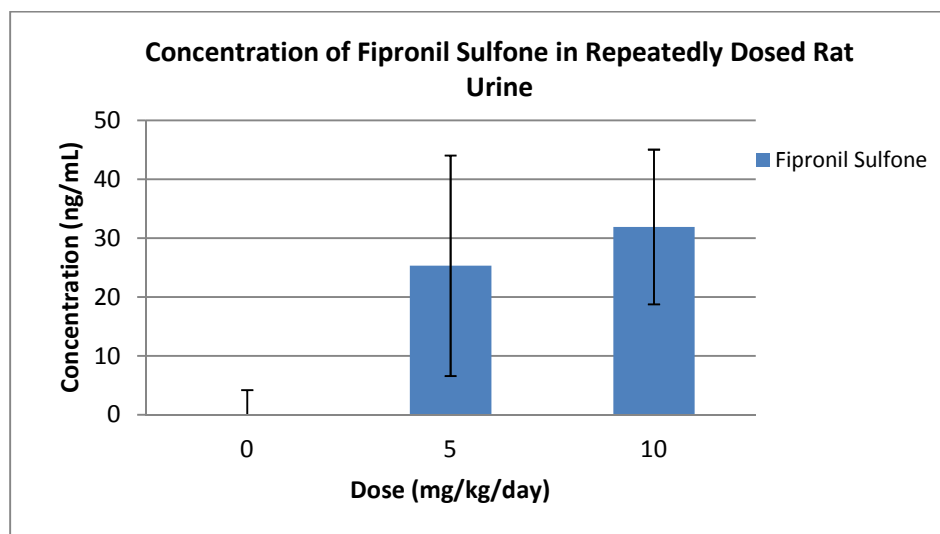

550

551 **SI Figure 1.** Median fipronil sulfone concentration in rat urine.

552

553

554

555

556

557

558

559

560

561

## 562 5.7 Time-of-flight mass spectrometry scoring and isotope patterns.

563

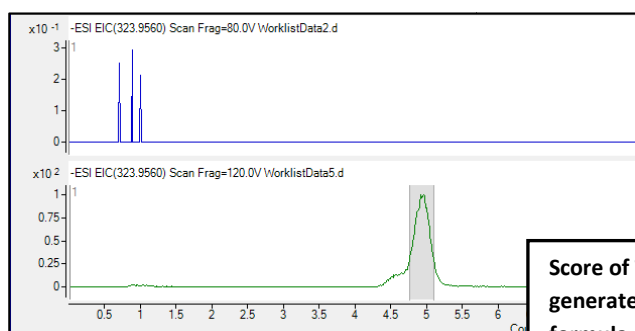

Score of TOF-generated molecular formula.

564

| Best | DBE | Formula             | Score | 324.9633 | 324.9633 |
|------|-----|---------------------|-------|----------|----------|
| 8    |     | C10 H4 Cl2 F3 N3 O2 | 99.46 |          |          |

565

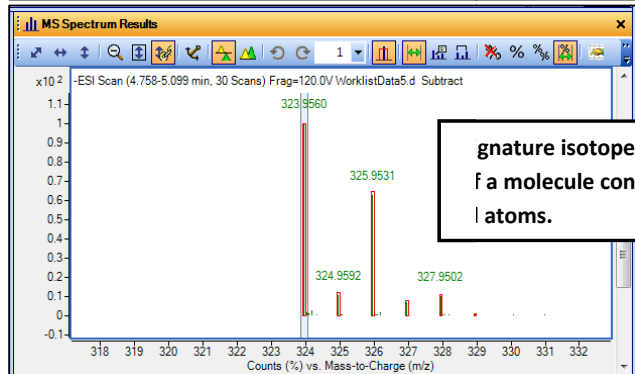

Signature isotope pattern of a molecule containing 2 chlorine atoms.

566

567 **SI Figure 2** shows the spectral pattern of a molecule containing 2 chlorine atoms. Note that  
568 323.9560  $m/z$  is the most abundant isotope, 325.9531  $m/z$  contains one  $^{37}\text{Cl}$ , and 327.9502  $m/z$   
569 contains two  $^{37}\text{Cl}$ . The 324.9592  $m/z$  contains one  $^{13}\text{C}$ . The numerical ranking for formula  
570 generated for compound (M4) is shown. The top extracted ion chromatogram (Worklist Data 2)  
571 shows a control animal sample and the absence of a peak for M4.

572

573

574

575

## 576 5.8 Metabolite M7 in rat urine

577

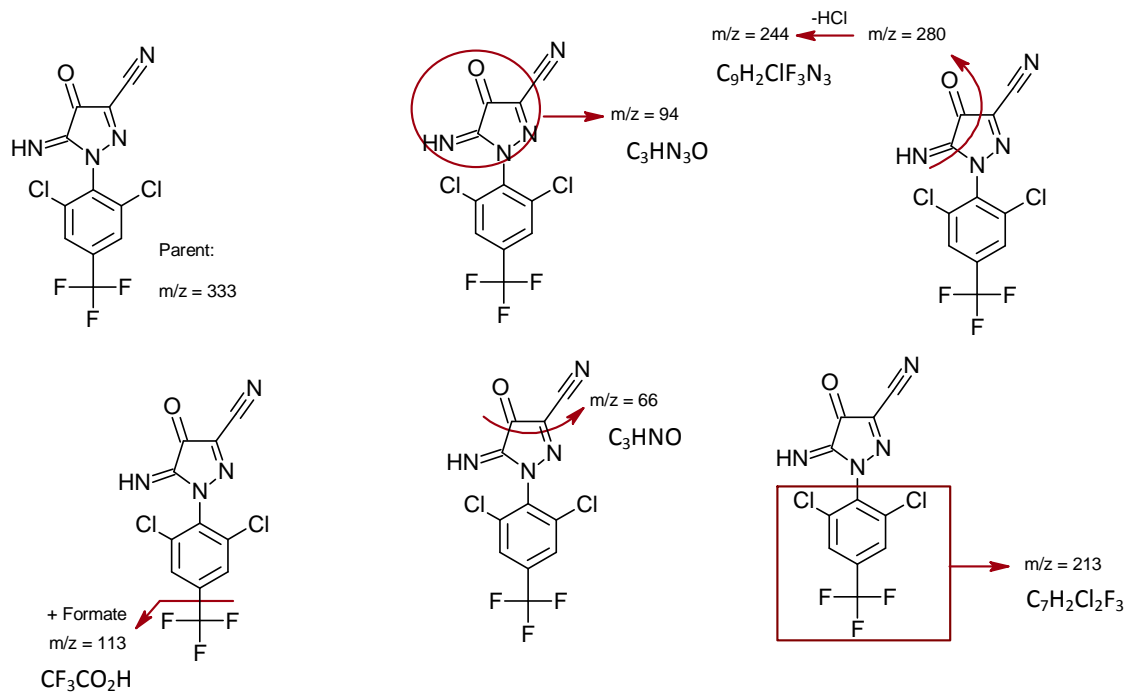

578  
579

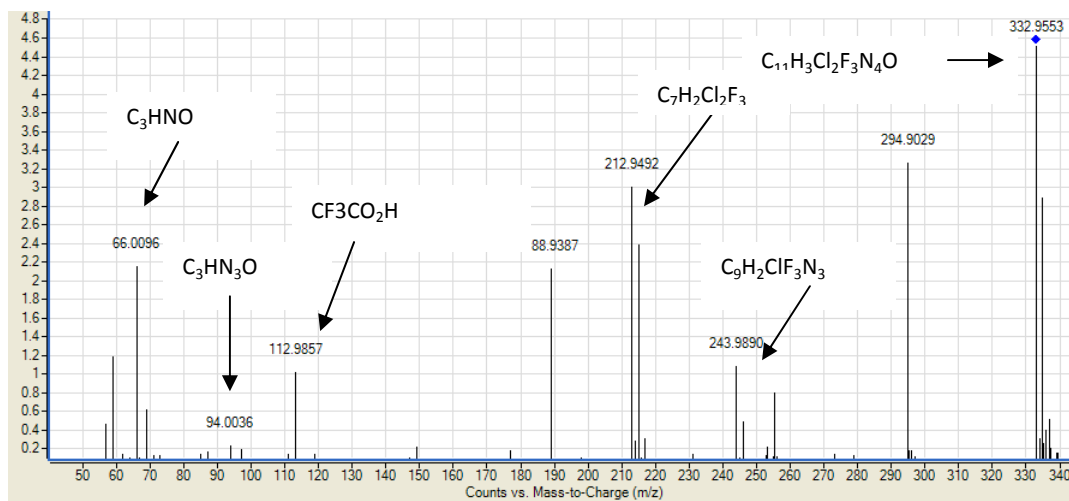

580

581 **SI Figure 3** shows the fragmentation pattern of Metabolite M7 in the LC/Q-TOF. The red  
 582 circles/boxes show the fragment and the spectrum at the bottom shows the peaks corresponding  
 583 to the fragments.

584 **5.9 Transitions in LC/triple quad method.** SI Table 6 below lists the parent to daughter  
 585 transitions which were monitored in the Agilent 1100 LC/triple quad method.

586 **SI Table 6.** LC/triple quad parent-daughter transitions.

| Compound            | Transition | Parent | Daughter |
|---------------------|------------|--------|----------|
| Fipronil            | 1°         | 434.9  | 329.8    |
| Fipronil            | 2°         | 434.9  | 249.9    |
| Fipronil            | 3°         | 434.9  | 277.8    |
| Fipronil sulfone    | 1°         | 451.1  | 415.0    |
| Fipronil sulfone    | 2°         | 451.1  | 281.9    |
| Fipronil sulfone    | 3°         | 451.1  | 243.9    |
| Fipronil sulfide    | 1°         | 418.9  | 382.8    |
| Fipronil sulfide    | 2°         | 418.9  | 261.7    |
| Fipronil sulfide    | 3°         | 418.9  | 313.8    |
| Fipronil amide      | 1°         | 452.9  | 347.7    |
| Fipronil amide      | 2°         | 452.9  | 303.8    |
| Fipronil amide      | 3°         | 452.9  | 271.9    |
| Monochloro fipronil | 1°         | 401.1  | 283.9    |
| Monochloro fipronil | 2°         | 401.1  | 295.9    |
| Monochloro fipronil | 3°         | 401.1  | 331.9    |
| Fipronil des F3     | 1°         | 387.2  | 281.9    |
| Fipronil des F3     | 2°         | 387.2  | 331.0    |
| Fipronil des F3     | 3°         | 387.2  | 351.0    |

587

588

589

590

591

592

593

594

595 **5.10 SI Figure 6** shows fipronil des-F<sub>3</sub> which was used as an internal standard for analytical  
596 methods due to its similarity in structure to fipronil. The structure is shown below.

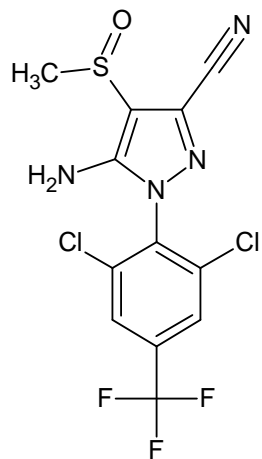

597

598

599 Molecular Formula: C<sub>12</sub>H<sub>7</sub>Cl<sub>2</sub>F<sub>3</sub>N<sub>4</sub>OS

600 Monoisotopic Mass: 381.966971 Da

601 [M-H]<sup>-</sup>: 380.959694 Da

602

603 AUTHOR CONTRIBUTIONS



604 The manuscript was written through equal contributions of all authors. All authors have given  
605 approval to the final version of the manuscript.

#### 606 ACKNOWLEDGMENTS

607 This research was supported by an appointment to the Research Participation Program at the  
608 National Exposure Research Laboratory administered by the Oak Ridge Institute for Science  
609 Education through an interagency agreement between the U.S. Department of Energy and the  
610 U.S. Environmental Protection Agency. We thank Agilent Technologies for providing us with  
611 the LC/TOF mass spectrometer that was used to investigate metabolic products. We also thank  
612 Michael Hays of US EPA who kindly allowed the use of his LC/Q-TOF mass spectrometer for  
613 further structure elucidation, Benny Pyke of Arizona State University for discussions on  
614 detection of fipronil in human urine, and Matthew Stiegel, Jon Sobus, and Peter Egeghy for help  
615 with data analysis.

616

#### 617 DISCLAIMER

618 This article will be reviewed in accordance with the policy of the National Exposure Research  
619 Laboratory, U.S. Environmental Protection Agency, and approved for publication. Approval  
620 does not signify that the contents necessarily reflect the view and policies of the Agency, nor  
621 does mention of trade names or commercial products constitute endorsement or recommendation  
622 for use.

623

#### 624 REFERENCES

625

- 626 1. Brassard, D.; Haddad, S.; Hill, E., US EPA BEAD Chemical Profile for Registration  
627 Review: Fipronil (PC Code: 129121). In 2011.
- 628 2. Hainzl, D.; Casida, J. E., Fipronil insecticide: Novel photochemical desulfinylation with  
629 retention of neurotoxicity. *Proceedings of the National Academy of Sciences* **1996**, *93*, 12764-  
630 12767.
- 631 3. Ikeda, T.; Nagata, K.; Kono, Y.; Yeh, J. Z.; Narahashi, T., Fipronil modulation of  
632 GABAA receptor single-channel currents. *Pest Management Science* **2004**, *60*, (5), 487-492.
- 633 4. Hainzl, D.; Cole, L. M.; Casida, J. E., Mechanisms for Selective Toxicity of Fipronil  
634 Insecticide and Its Sulfone Metabolite and Desulfinyl Photoproduct. *Chemical Research in*  
635 *Toxicology* **1998**, *11*, 1529-1535.
- 636 5. Rhône-Poulenc Agro to boost fipronil production. *Agrow* **1997**, *294*, 17.
- 637 6. *Trends in Concentrations of Pesticides in Urban Streams in the United States, 1992-*  
638 *2008*; USGS.
- 639 7. Gunasekara, A. S.; Truong, T.; Goh, K. S.; Spurlock, F.; Tjeerderma, R. S.,  
640 Environmental fate and toxicology of fipronil. *Journal of Pesticide Science* **2007**, *32*, 189-199.
- 641 8. Erickson, B. E., Europe to ban fipronil pesticide to protect bees. *Chemical & Engineering*  
642 *News Archive* **2013**, *91*, (29), 21.
- 643 9. Mohamed, F.; Senarathna, L.; Percy, A.; Abeyewardene, M.; Eaglesham, G.; Cheng, R.;  
644 Azher, S.; Hittarage, A.; Dissanayake, W.; Sheriff, M. H.; Davies, W.; Buckley, N. A.; M., E.,  
645 Acute human self-poisoning with the N-phenylpyrazole insecticide fipronil--a GABAA-gated  
646 chloride channel blocker. *Journal of Toxicology. Clinical Toxicology* **2004**, *42*, 955-963.
- 647 10. Cravedi, J. P.; Delous, G.; Zalko, D.; Viguie, C.; Debrauwer, L., Disposition of fipronil in  
648 rats. *Chemosphere* **2013**, *93*, 2275-2283.
- 649 11. Tingle, C. C. D.; Rother, J. A.; Dewhurst, C. F.; Lauer, S.; King, W. J., Fipronil:  
650 Environmental Fate, Ecotoxicology, and Human Health Concerns. *Reviews of Environmental*  
651 *Contamination and Toxicology* **2003**, *176*, 1-66.
- 652 12. Ohi, M.; Dalsenter, P. R.; Andrade, A. J. M.; Nascimento, A. J., Reproductive adverse  
653 effects of fipronil in Wistar rats. *Toxicology Letters* **2004**, *146*, (2), 121-127.
- 654 13. Raquel, P.; Tercariol, G.; Godinho, A. F., Behavioral effects of acute exposure to the  
655 insecticide fipronil. *Pesticide Biochemistry and Physiology* **2011**, *99*, 221-225.
- 656 14. *New Pesticide Fact Sheet for Fipronil*; US EPA: 1996.
- 657 15. Vidau, C.; Gonzalez-Polo, R. A.; Niso-Santano, M.; Gomez-Sanchez, R.; Bravo-San  
658 Pedro, J. M.; Pizarro-Estrella, E.; Blasco, R.; Brunet, J. L.; Belzunces, L. P.; Fuentes, J. M.; ,

- 659 Fipronil is a powerful uncoupler of oxidative phosphorylation that triggers apoptosis in human  
660 neuronal cell line SHSY5Y. *NeuroToxicology* **2011**, *32*, 935-943.
- 661 16. Tang, J. A.; Usmani, K.; Hodgson, E.; Rose, R. L., In vitro metabolism of fipronil by  
662 human and rat cytochrome P450 and its interactions with testosterone and diazepam. *Chemico-  
663 Biological Interactions* **2004**, *147*, (3), 319-329.
- 664 17. Herin, F.; Boutet-Robinet, E.; Levant, A.; Dulaurent, S.; Manika, M.; Galatry-Bouju, F.;  
665 Caron, P.; Soulat, J.-M., Thyroid function tests in persons with occupational exposure to fipronil.  
666 *Thyroid* **2011**, *21*.
- 667 18. Freeborn, D. L.; McDaniel, K. L.; Moser, V. C.; Herr, D. W., Use of  
668 electroencephalography (EEG) to assess CNS changes produced by pesticides with different  
669 modes of action: effects of permethrin, deltamethrin, fipronil, imidacloprid, carbaryl, and  
670 triadimefon. *Toxicology and Applied Pharmacology*, (doi:10.1016/j.taap.2014.11.011), in press.
- 671 19. Moser, V. C.; Stewart, N.; Lyke, D. F.; Crooks, J.; MacMillan, D. K.; Hedge, J. M.;  
672 Wood, C. E.; McMahan, R. L.; Strynar, M. J.; Herr, D. W., Assessment of serum biomarkers in  
673 rats after exposure to pesticides of different chemical classes. *Toxicology and Applied  
674 Pharmacology*, (doi:10.1016/j.taap.2014.11.016), in press.
- 675 20. Xie, T.; Liang, Y.; A, J.; Hao, H.; Liu, L.; Zheng, X.; Dai, C.; Zhou, Y.; Guan, T.; Liu,  
676 Y.; Xie, L.; Wang, G., Post acquisition data processing techniques for lipid analysis by  
677 quadrupole time-of-flight mass spectrometry. *Journal of Chromatography B* **2012**, *905*, (0), 43-  
678 53.
- 679 21. In *Pesticide Residues in Food. Fipronil: Residue Evaluation 2001.*, Joint Meeting on  
680 Pesticide Residues in Food
- 681 22. Lacroix, M. Z.; Puel, S.; Toutain, P. L.; Viguie, C., Quantification of fipronil and its  
682 metabolite fipronil sulfone in rat plasma over a wide range of concentrations by LC/UV/MS.  
683 *Journal of Chromatography B* **2010**, *878*, 1934-1938.
- 684 23. Pleil, J. D.; Sobus, J. R.; Stiegel, M. A.; Hu, D.; Oliver, K. D.; Olenick, C.; Strynar, M.  
685 J.; Clark, M.; Madden, M. C.; Funk, W. E., Estimating Common Parameters of Lognormally  
686 Distributed Environmental and Biomonitoring Data: Harmonizing Disparate Statistics From  
687 Publications. *Journal of Toxicology and Environmental Health, Part B* **2014**, *17*, 341-368.
- 688 24. In *Pesticide Residues in Food. Fipronil: Residue evaluation 1997.*, Joint Meeting on  
689 Pesticide Residues in Food.
- 690 25. Kim, D.; Guengerich, F. P., CYTOCHROME P450 ACTIVATION OF ARYLAMINES  
691 AND HETEROCYCLIC AMINES. *Annual Reviews in Pharmacology and Toxicology* **2005**, *45*,  
692 27-49.
- 693 26. Snyderwine, E. G.; Turesky, R. J.; Turteltaub, K. W.; Davis, C. D.; Sadrieh, N.; Schut, H.  
694 A. J.; Nagao, M.; Sugimura, T.; Thorgeirsson, U. P.; Adamson, R. H.; Thorgeirsson, S. S.,

- 695 Metabolism of food-derived heterocyclic amines in nonhuman primates. *Mutation*  
696 *Research/Fundamental and Molecular Mechanisms of Mutagenesis* **1997**, 376, (1–2), 203-210.
- 697 27. Eisenbrand, G.; Tang, W., Food-borne heterocyclic amines. Chemistry, formation,  
698 occurrence, and biological activities. A literature review. *Toxicology* **1993**, 12, 1-82.
- 699 28. Pezdirc, M.; Zegura, B.; Filipic, M., Genotoxicity and induction of DNA damage  
700 responsive genes by food-borne heterocyclic aromatic amines in human hepatoma HepG2 cells.  
701 *Food Chem. Toxicol.* **2013**, 59, 386-394.
- 702 29. Nagao, M.; Sugimura, T., Carcinogenic factors in food with relevance to colon cancer  
703 development. *Mutation Research/Fundamental and Molecular Mechanisms of Mutagenesis*  
704 **1993**, 290, (1), 43-51.
- 705 30. Schut, H. A. J.; Snyderwine, E. G., DNA adducts of heterocyclic amine food mutagens:  
706 implications for mutagenesis and carcinogenesis. *Carcinogenesis* **1999**, 20, (3), 353-368.
- 707 31. Morgan, M. K.; Stout, D. M.; Jones, P. A.; Barr, D. B., An observational study of the  
708 potential for human exposures to pet-borne diazinon residues following lawn applications.  
709 *Environmental Research* **2008**, 107, 336-342.
- 710 32. Dyk, M. B.; Liu, Y.; Chen, Z.; Vega, H.; Krieger, R. I., Fate and distribution of fipronil  
711 on companion animals and in their indoor residences following spot-on flea treatments. *Journal*  
712 *of Environmental Science and Health, Part B* **2012**, 47, 913-924.
- 713 33. Ensminger, M.; Budd, R.; Kelley, K.; Goh, K., Pesticide occurrence and aquatic  
714 benchmark exceedances in urban surface waters and sediments in three urban areas of California,  
715 USA, 2008–2011. *Environ Monit Assess* **2013**, 185, (5), 3697-3710.
- 716 34. van Niel, M. B.; Collins, I.; Beer, M. S.; Broughton, H. B.; Cheng, S. K. F.; Goodacre, S.  
717 C.; Heald, A.; Locker, K. L.; MacLeod, A. M.; Morrison, D.; Moyes, C. R.; O'Connor, D.; Pike,  
718 A.; Rowley, M.; Russell, M. G. N.; Moyes, C. R.; O'Connor, D.; Pike, A.; Rowley, M.; Russell,  
719 M. G. N.; Sohal, B.; Stanton, J. A.; Thomas, S.; Verrier, H.; Watt, A. P.; Castro, J. L.,  
720 Fluorination of 3-(3-(piperidin-1-yl)propyl)indoles and 3-(3-(piperazin-1-yl)propyl)indoles gives  
721 selective human 5-HT1D receptor ligands with improved pharmacokinetic profiles. *Journal of*  
722 *Medicinal Chemistry* **1999**, 42, (12), 2087-2104.
- 723 35. Rowley, M.; Hallett, D. J.; Goodacre, S.; Moyes, C.; Crawforth, J.; Sparey, T. J.; Patel,  
724 S.; Marwood, R.; Patel, S.; Thomas, S.; Hitzel, L.; O'Connor, D.; Szeto, N.; Castro, J. L.;  
725 Hutson, P. H.; MacLeod, A. M., 3-(4-fluoropiperidin-3-yl)-2-phenylindoles as high affinity,  
726 selective, and orally bioavailable h5-HT2A receptor antagonist. *Journal of Medicinal Chemistry*  
727 **2001**, 44, (10), 1603-1614.
- 728 36. Chambers, R. D., *Fluorine in Organic Chemistry*. Blackwell Publishing: Oxford, 2000.
- 729 37. Morgenthaler, M.; Schweizer, E.; Hoffmann-Ro, A.; Martin, R. E.; Jaeschke, G.;  
730 Wagner, B.; Fischer, H.; Bendels, S.; Zimmerli, D.; Schneider, J.; Diederich, F.; M., K.; Mu, K.,

- 731 Predicting properties and tuning physicochemical in lead optimization: Amine basicities.  
732 *ChemMedChem* **2007**, 2, 1100.
- 733 38. Purser, S.; Moore, P. R.; Swallow, S.; Gouverneur, V., Fluorine in medicinal chemistry.  
734 *Chemical Society Reviews* **2008**, 37, (2), 320-330.
- 735 39. Smart, B. E., Fluorine Substituent Effects (on bioactivity). *Journal of Fluorine Chemistry*  
736 **2001**, 109, (1), 3-11.
- 737 40. Smith, D. A.; van de Waterbeemd, H.; Walker, D. K., Methods and Principles in  
738 Medicinal Chemistry, vol 31: Pharmacokinetics and Metabolism in Drug Design. *Wiley-VCH*  
739 **2006**, 31.
- 740

1 Identification of fipronil metabolites by time-of-  
2 flight mass spectrometry for application in a human  
3 exposure study

4 *Rebecca.L. McMahan<sup>a</sup>, Mark J. Strynar<sup>b\*</sup>, Sonia Dagnino<sup>a</sup>, David W. Herr<sup>c</sup>, Virginia C. Moser<sup>c</sup>,*  
5 *Stavros Garantziotis<sup>d</sup>, Erik M. Andersen<sup>b</sup>, Danielle L. Freeborn<sup>c</sup>, Larry McMillan<sup>e</sup>, Andrew B.*  
6 *Lindstrom<sup>b</sup>*

7 <sup>a</sup>ORISE fellow at the United States Environmental Protection Agency, National Exposure  
8 Research Laboratory, Research Triangle Park, North Carolina

9 <sup>b</sup>United States Environmental Protection Agency, National Exposure Research Laboratory,  
10 Research Triangle Park, North Carolina

11 <sup>c</sup>National Health and Environmental Effects Research Lab, U.S. Environmental Protection  
12 Agency, Research Triangle Park, North Carolina

13 <sup>d</sup>National Institute for Environmental and Health Sciences, Research Triangle Park, North  
14 Carolina

15 <sup>e</sup>National Caucus and Center on Black Aged Employee, U.S. Environmental Protection Agency,  
16 National Exposure Research Laboratory, Research Triangle Park, North Carolina

17 \*CORRESPONDING AUTHOR:

18 Phone: (919)541-3706

19 Address: 109 TW Alexander Dr. Durham, NC 27705

20 Email: strynar.mark@epa.gov

21

22 ABSTRACT

23 Fipronil is a phenylpyrazole insecticide commonly used in residential and agricultural  
24 applications. To understand more about the potential risks for human exposure associated with  
25 fipronil, urine and serum from dosed Long Evans adult rats (5 and 10 mg/kg bw) were analyzed  
26 to identify metabolites as potential biomarkers for use in human biomonitoring studies. Urine  
27 from treated rats was found to contain seven unique metabolites, two of which had not been  
28 previously reported—M4 and M7 which were putatively identified as a nitroso compound and an  
29 imine, respectively. Fipronil sulfone was confirmed to be the primary metabolite in rat serum.  
30 The fipronil metabolites identified in the respective matrices were then evaluated in matched  
31 human urine ( $n=84$ ) and serum ( $n=96$ ) samples from volunteers with no known pesticide  
32 exposures. Although no fipronil or metabolites were detected in human urine, fipronil sulfone  
33 was present in the serum of approximately 25% of the individuals at concentrations ranging from  
34 0.1-4 ng/mL. These results indicate that many fipronil metabolites are produced following  
35 exposures in rats and that fipronil sulfone is a useful biomarker in human serum. Furthermore,  
36 human exposure to fipronil may occur regularly and require more extensive characterization.

37 Keywords: Fipronil, LC/TOF, Biomarker, Human Exposure, Metabolism

38 ABBREVIATIONS

39 DI: Deionized

40 ESI: electrospray ionization

41 GABA: gamma-aminobutyric acid

42 GSD: geometric standard deviation

43 HPLC: high performance liquid chromatography

44 LC: liquid chromatography

45 LLOQ: lower limit of quantitation

46 MS: mass spectrometry

47 NIEHS: National Institute for Environmental Health Sciences

48 QC: quality control

49 Q-TOF: quadrupole time-of-flight

50 % RSD: Percent Relative Standard Deviation

51 SD: standard deviation

52 SPE: solid phase extraction

53 TOF: time-of-flight

54 UPLC: ultra performance liquid chromatography

55 US EPA: United States Environmental Protection Agency

56

57 1. INTRODUCTION

58 Fipronil (Figure 1) is a phenylpyrazole broad-spectrum insecticide that is registered for use in  
59 residential settings as part of ant and cockroach baits and gels and termite control products;  
60 veterinary applications such as spot treatment flea and tick control products for dogs and cats;  
61 ornamental turf applications such as fire ant control; and agricultural applications such as pest  
62 control on potato crops<sup>1</sup>. When initially produced, fipronil was the first insecticide to act by



63 targeting the gamma-aminobutyric acid (GABA) receptor and has favorable selective toxicity  
64 towards insects rather than mammals<sup>2-4</sup>.

65 A 1997 report indicated that 480 tons of fipronil were produced per year by Rhone Poulenc,<sup>5</sup>  
66 and a more recent EPA report indicated that between 1998 and 2008 usage averaged 150,000  
67 pounds of active ingredient per 1.5 million acres<sup>1</sup>. Widespread fipronil use has led to  
68 contamination of water and soil (1-158 ng/L of parent or environmental degradate) in several  
69 states including, but not limited to Alabama, Georgia, California, Louisiana, and Indiana<sup>6, 7</sup>.  
70 Perhaps as a result of this contamination, fipronil has been implicated as one of the chemicals  
71 associated with the colony bee collapse<sup>8</sup>.

72 Because little was found in the peer-reviewed literature about the disposition of fipronil,  
73 Cravedi et al. (2013) performed a thorough study on the metabolism, distribution, and  
74 elimination of fipronil in rats and showed that fipronil is primarily converted to fipronil sulfone  
75 (M1 Figure 1), a more persistent metabolite (estimated half-life is 208 hours in rodents)<sup>9</sup> which  
76 was stored mainly in adipose tissue and adrenals<sup>10</sup>. In addition, fipronil has been associated with  
77 thyroid disruption<sup>11</sup>, endocrine disruption<sup>12</sup>, and neurotoxic effects<sup>13</sup> in rats which has led to  
78 concern about the potential for human health effects in the last decade.

79 The effects of acute human exposure to fipronil include headache, dizziness, vomiting, and  
80 seizures<sup>9, 10</sup>. Information on the effects of chronic exposure is limited, but the US EPA has  
81 classified fipronil as a possible human carcinogen based on data that shows an increase of  
82 thyroid follicular cell tumors in both sexes of the rat<sup>14</sup>. Vidau et al. (2011) also concluded that  
83 fipronil has the potential to cause apoptosis by uncoupling oxidative phosphorylation at  
84 relatively low concentrations (5-10  $\mu$ M) in human cell lines,<sup>15</sup> and a case of acute human self-  
85 poisoning with fipronil has demonstrated that fipronil levels can remain elevated in serum for

86 days after exposure, and that fipronil sulfone was the primary metabolite<sup>9</sup>. A previous study also  
87 showed that fipronil sulfone is the predominant metabolite in human liver microsomes via  
88 cytochrome P-450 oxidation<sup>16</sup>.

89 Although, one occupational exposure study of workers ( $n=159$ ) at a fipronil production facility  
90 reports a mean fipronil sulfone serum level of 7.8 (SD = 7.7) ng/mL,<sup>17</sup> very little is known about  
91 human exposure to fipronil in the general population<sup>9, 15, 17</sup>. This may be because human samples  
92 can be difficult to obtain and analyze due to high concentrations of endogenous chemicals and  
93 significant matrix effects which make the identification of metabolites difficult. The specific  
94 objectives of the study were to develop a unique workflow where dosed animal samples were  
95 used to identify potential serum/urine biomarkers via time-of-flight mass spectrometry which  
96 were subsequently evaluated in serum and urine of a group of volunteers from North Carolina to  
97 assess exposure.

98

## 99 MATERIALS AND METHODS

100 **2.1 Chemicals.** Unlabeled fipronil (5-amino-1-[2,6-dichloro-4-(trifluoromethyl)-phenyl]-4-  
101 (trifluoromethylsulfinyl)-1-*H*-pyrazole-3-carbonitrile, >99%) and its metabolites: fipronil  
102 sulfone (5-amino-1-[2,6-dichloro-4-(trifluoromethyl)-phenyl]-4-[(trifluoromethyl)sulfonyl]-1-*H*-  
103 pyrazole-3-carbonitrile, >99%), fipronil sulfide (5-amino-1-[2,6-dichloro-4-(trifluoromethyl)-  
104 phenyl]-4-[(trifluoromethyl)thio]-1-*H*-pyrazole-3-carbonitrile, 98%), fipronil amide (5-amino-1-  
105 [2,6-dichloro-4-(trifluoromethyl)-phenyl]-4-[(trifluoromethyl)thio]-1-*H*-pyrazole-3-carboxamide,  
106 >99%), and monochloro fipronil (5-amino-1-[2-chloro-4-(trifluoromethyl)-phenyl]-4-  
107 [(trifluoromethyl)sulfinyl]-1-*H*-pyrazole-3-carbonitrile, >97%) were procured as solid analytical  
108 standards from the pesticide repository through the US EPA (Fort Meade, MD, USA). These five

109 analytical standards were prepared as a mixture in acetonitrile and used for all subsequent  
110 matrix-matched standard curves. The internal standard fipronil des-F<sub>3</sub> (see supporting  
111 information for structure) (5-amino-1-[2,6-dichloro-4-(trifluoromethyl)-phenyl]-4-  
112 (methylsulfinyl)-1-H-pyrazole-3-carbonitrile, 99%, 0.1 ng/μL in Acetonitrile) was ordered from  
113 Crescent Chemical Company (Islandia, NY, USA).

114 Acetonitrile and methanol (B&J Brand HighPurity Solvent) were purchased from Honeywell  
115 Burdick & Jackson (Muskegon, MI, USA) and ammonium acetate from Sigma Aldrich (St.  
116 Louis, MO, USA). Deionized water was generated in house from a Barnsted Easypure UV/UF  
117 (Dubuque, IA, USA) coupled with activated charcoal and ion exchange resin canisters.

118

119 **2.2 Animals.** This study was part of an investigation of the neurotoxic effects of fipronil in  
120 rodents<sup>18, 19</sup>. The animal facility is accredited by the American Association for Accreditation of  
121 Laboratory Animal Care International, and all protocols were approved by the National Health  
122 and Environmental Effects Research Laboratory Institutional Animal Care and Use Committee at  
123 the United States Environmental Protection Agency. Male Long Evans rats (60-90 days old)  
124 were acquired from Charles River Laboratories (Wilmington, MA). Animal husbandry details  
125 are provided in the Supporting Information. Animals were dosed **daily** by oral gavage at either 5  
126 (lowest dose) or 10 (highest dose) mg/kg with fipronil suspended in corn oil (1 mL/kg) every 24  
127 hours for two weeks. Control rats were gavaged with corn oil only. Six hours after the 14<sup>th</sup> dose,  
128 rats were euthanized. Trunk blood (2 mL) was collected in tubes without anticoagulant and  
129 stored on ice for 1-1.5 h.. The samples were centrifuged at 1300 × g for 30 min. at 4° C. The  
130 serum was collected, frozen on dry ice, and stored at -80 °C until analysis. Urine was collected in

131 a syringe either from voids on a clean table or via bladder puncture and transferred to a micro-  
132 centrifuge tube, immediately frozen on dry ice, and stored at -80 °C until analysis.

133 **2.3 Human Samples.** Matched human urine ( $n=84$ ) and serum ( $n=96$ ) samples, from  
134 individuals with no known fipronil exposure, were collected by the National Institute for  
135 Environmental and Health Sciences (NIEHS protocol number 10-E-0063) between April and  
136 June 2011. The human samples were simply a sample of convenience and were not meant to be  
137 representative of a specific population. The urine collected was a spot sample and was not  
138 concentrated or representative of a specific sampling period. Volunteers were anonymous, and  
139 no personally identifiable information was provided. The samples were from male and female  
140 volunteers of various ethnicities between 19 and 73 years of age who live in the Raleigh-Durham  
141 area of North Carolina (Table 1). Although 100 volunteers participated in the study, several urine  
142 and serum samples were not included due to an insufficient volume for analysis.

143 **Table 1.** Human demographic data for the 100 volunteers.  
144

|       | Sex  |        | Age   |       |       |       | Race  |       |       |       |
|-------|------|--------|-------|-------|-------|-------|-------|-------|-------|-------|
|       | Male | Female | 19-33 | 34-48 | 48-62 | 62-76 | Asian | Black | White | Other |
| 145 % | 30   | 70     | 29    | 30    | 33    | 8     | 3     | 32    | 63    | 2     |

146  
147  
148 **2.4 Extraction Protocols.** Samples were extracted in a manner that optimized recovery and  
149 reproducibility while reducing matrix interference. Animal samples were small volumes that did  
150 not require solid phase extraction (SPE). However, a protocol involving SPE was performed with  
151 the human samples to reduce matrix interference. Sample extraction protocols for biologicals are  
152 described below. More information on methods development for human samples can be found in  
153 the Supporting Information. Rat serum samples were first analyzed by liquid  
154 chromatography/time-of-flight mass spectrometer (LC/TOF-MS) in order to identify any  
155 metabolites. Human samples were then analyzed by liquid chromatography/triple-quadrupole

156 mass spectrometer (LC/triple-quad) for quantification of metabolites for which analytical  
157 standards were possessed. LC/quadrupole/time-of-flight mass spectrometry (LC/Q-TOF) was  
158 used for structure elucidation of unknown metabolites.

159 **2.5 Rat serum.** Rat serum (25  $\mu$ L) was denatured with 100  $\mu$ L of 0.1 M formic acid and  
160 precipitated with 1 mL of a cold acetonitrile solution spiked with the internal standard (fipronil  
161 des-F<sub>3</sub>, 25 ng). The sample was then centrifuged for 5 minutes at 12500  $\times$  g. An aliquot of the  
162 supernatant was mixed 50:50 with 10 mM ammonium acetate buffer, and analyzed via LC/TOF  
163 and LC/triple-quad.  $n=9$  for highest dose (10 mg/kg/day) ;  $n=10$  for low dose (5 mg/kg/day);  
164 and  $n=11$  for control animals, which were treated with vehicle. Quantitation was performed for  
165 fipronil and fipronil sulfone. The results of the quantitation are shown in the supporting  
166 information.

167 **2.6 Rat urine.** Rat urine (100  $\mu$ L) was precipitated with 900  $\mu$ L of cold acetonitrile and  
168 centrifuged for 8 minutes at 12500  $\times$  g. An aliquot of the supernatant was extracted and mixed  
169 50:50 with 10 mM ammonium acetate buffer before LC/MS analysis.  $n=3$  for highest dose (10  
170 mg/kg/day);  $n=4$  for low dose (5 mg/kg/day); and  $n=3$  for control animals. Quantitation was only  
171 performed for the fipronil sulfone metabolite, as standards were not available for other  
172 metabolites. Quantitation specifics can be found in the Supporting Information. Fipronil sulfone  
173 concentrations in rat urine were used to approximate the relative concentrations of the other  
174 observed metabolites.

175 **2.7 Human serum.** Human serum (200  $\mu$ L;  $n=96$ ) was denatured with 20  $\mu$ L of a 0.1 M  
176 formic acid solution spiked with internal standard (fipronil des-F<sub>3</sub>, 5 ng) and precipitated with 2  
177 mL of cold acetonitrile. The sample was centrifuged for 10 minutes at 12,500  $\times$  g and  
178 concentrated using solid phase extraction (SPE) using an Oasis 3cc HLB cartridge (Waters

179 Corporation, Milford, MA). SPE cartridges were conditioned with 3 mL of methanol and 3 mL  
180 of ultrapure water, samples were loaded, washed with 3 mL of 95:5 water/acetonitrile solution,  
181 then eluted with 3 mL of acetonitrile. The eluate was evaporated under N<sub>2</sub> at 40° C until  
182 approximately 200 µL remained. The concentrated solution was mixed 50:50 with 10 mM  
183 ammonium acetate buffer and analyzed via LC/TOF and LC/triple-quad for all compounds listed  
184 in the chemical section. In order to determine the concentration of compounds of interest, a  
185 seven-point matrix-matched (blank calf serum-Life Technologies-Gibco®, Grand Island, NY)  
186 extracted standard curve from 0.1-50 ng/mL, along with a method blank (DI water) and a matrix  
187 blank was run with the human serum samples. The lowest value on the standard curve (0.1  
188 ng/mL) was considered the lower limit of quantitation (LLOQ).

189 **2.8 Human urine.** Human urine (5-12 mL; *n*=84) was precipitated with 1 mL of acetonitrile  
190 and concentrated using the SPE method described above with an Oasis 6cc HLB cartridge with  
191 the exception that cartridges were conditioned with 5 mL of methanol and 5 mL of ultrapure  
192 water, samples were loaded, washed with 5 mL of 95:5 water/acetonitrile solution, then eluted  
193 with 5 mL of acetonitrile. The eluate was evaporated under N<sub>2</sub> at 40° C until approximately 1 mL  
194 remained. The concentrated solution was mixed 50:50 with 10 mM ammonium acetate buffer in  
195 an LC vial and analyzed by LC-TOF/MS (*n*=84) for all compounds listed in the chemicals  
196 section, as well as for any unknown metabolites. Note that several urine samples were excluded  
197 due to insufficient volume.

198 **2.9 Analytical Instrumentation.** Targeted analyses (LC/triple-quad) were carried out using an  
199 Agilent 1100 HPLC (Agilent Technologies, Palo Alto, CA) interfaced with a Sciex 3000 triple  
200 quadrupole mass spectrometer (Applied Biosystems/MDS Sciex, Foster City, CA) fitted with an  
201 electrospray ionization source (ESI) operated in the negative ionization mode. Compounds

202 contained in the LC/triple-quad method (fipronil, fipronil sulfone, fipronil sulfide, fipronil  
203 amide, and monochloro fipronil) were optimized on a compound specific basis. Information  
204 regarding transitions are included in the Supporting Information.

205 The HPLC system consisted of a Phenomenex Luna C18 column (50 x 3 mm, 5  $\mu$ m; Torrance,  
206 CA, USA) with a Security-guard guard column (Phenomenex). The method consisted of the  
207 following: 0.4 mL/min flow rate which increased to 0.75 mL/min at time=2 min; temperature: 30  
208  $^{\circ}$ C; mobile phases – A: ammonium acetate buffer (0.2 mM) and DI water:methanol (95:5, v/v),  
209 and B: ammonium acetate buffer (0.2 mM) and acetonitrile:DI water (95:5, v/v); gradient: 0-2  
210 min 50% A and 50% B; 2.1-4 min, a linear gradient from 50:50 A:B to 10:90 A:B; 4-6 min 10%  
211 A and 90% B; 6.1-10 min re-equilibration to 50% A and 50% B.

212 Non-targeted analyses (LC/TOF) were carried out using an Agilent 1100 HPLC (Agilent  
213 Technologies, Palo Alto, CA) interfaced with an Agilent 6210 Time-of-Flight (TOF) mass  
214 spectrometer fitted with an electrospray ionization source operated in the negative ionization  
215 mode at 120 Volts. Any drift in the mass accuracy of the TOF was continuously corrected by  
216 infusion of two reference compounds (purine [ $m/z$  = 119.0363] and hexakis (1H, 1H, 3H-  
217 tetrafluoroproxy) phosphazene [ $m/z$  = 966.0007]) via dual-ESI sprayer.

218 The HPLC method consisted of a Zorbax Eclipse Plus C18 column (2.1  $\times$  50 mm, 3.5  $\mu$ m;  
219 Agilent Technologies, Palo Alto, CA) fitted with a Phenomenex guard column (Torrance, CA).  
220 The method consisted of the following: 0.2 mL/min flow rate; at 30  $^{\circ}$ C; mobile phases: A:  
221 ammonium formate buffer (0.4 mM) and DI water:methanol (95:5 v/v), and B: ammonium  
222 formate (0.4 mM) and methanol:DI water (95:5 v/v); gradient: 0-5 min a linear gradient from  
223 50:50 A:B to 100% B; 5-15 min, 100% B; 15-18 min re-equilibration to 50% A and 50% B.

224 **2.10 Identification of Spectral Features.** The TOF-MS system has proprietary software that  
225 can be used in non-targeted analyses to help identify compounds that are specific to a treatment  
226 group or a specific experimental condition. For example, to identify potential biomarkers of  
227 fipronil exposure, control and dosed animal samples are analyzed, and molecular features  
228 (identifiable peaks) were first extracted according to user specified criteria (e.g., minimum peak  
229 height, area count). The two groups of extracted features were then compared using The Mass  
230 Profiler software, which singles out only those compounds that are found in the dosed group.  
231 This collection of compounds can be thought to represent either the parent compound,  
232 metabolites of the parent, or specific biological responses that are attributable to the treatment  
233 administered.

234 The exact monoisotopic mass of each of these "treatment only" features was then used to  
235 generate a ranked list of possible chemical formulae for each unknown. The numerical ranking  
236 is based on the difference between the calculated and measured mass, the isotopic abundance and  
237 the isotope spacing. If authentic standards are available, the identity of a proposed feature can be  
238 confirmed using chromatographic retention time, exact monoisotopic mass, and isotopic  
239 distribution.

240 Fipronil is an interesting and somewhat unique compound because it contains six fluorine  
241 atoms and two chlorine atoms, that result in a significant negative mass defect (435.93869 Da,  
242 with the  $[M-H]^-$  ion seen in negative ionization mode being 434.9314  $m/z$ ) which is preserved in  
243 most of its metabolic products to the extent that the F and Cl atoms are retained<sup>20</sup>. Moreover, the  
244 isotopic spacing between the Cl isotopes (<sup>35</sup>Cl [75.77%] and <sup>37</sup>Cl [24.23%]) leads to a distinctive  
245 isotopic pattern that aids greatly with identification (SI Figure 2). Both of these characteristics  
246 were useful in identifying fipronil-related metabolites.



247 Metabolites that were identified using the LC/TOF instrument described above were then  
248 investigated further using an Agilent 1200 HPLC system fitted with a 6250 quadrupole time-of-  
249 flight mass spectrometer (Q-TOF) (Agilent Technologies, Palo Alto, CA) using the same LC  
250 conditions as previously described. The LC/Q-TOF allowed fragmentation at various collision  
251 energies of metabolites of interest which helped with structure elucidation.

252 **2.11 Quality Assurance/Control.** For each analysis, method and matrix blanks were  
253 evaluated for contamination or background levels of the compounds of interest. The LLOQ was  
254 determined as the concentration of the lowest working standard, which back-predicted within  
255 30% of a theoretical value. The LLOQ in the quantitative human serum experiments was  
256 validated by calculating signal-to-noise ratios for the 451-415  $m/z$  transition relative to a method  
257 blank. R-squared values for all quantitative procedures were monitored to ensure predictability.  
258 Three randomly chosen samples were replicated in each quantitative experiment to ensure  
259 consistency within the data sets. Parent-daughter ratios should be consistent, and ratio  
260 monitoring is a robust way to confirm the presence of a specific compound. Therefore, in the  
261 targeted screening of samples, the ratio between the primary and secondary parent-daughter  
262 transition was monitored to confirm the presence of each compound in the MS method. High and  
263 low concentration quality control (QC) samples containing the fipronil mixture of five analytical  
264 standards described in the *Chemicals* section were run with each batch of human serum samples  
265 to ensure analytical precision and accuracy.

266

### 267 3. RESULTS

268 **3.1 Quality Assurance/Control.** All lab prepared target and non-target analysis blanks and  
269 control samples were below the respective LLOQ for compounds of interest in all experiments.

270 Validation of the LLOQ in the human serum quantitative experiments showed that the lowest  
271 curve point differed from the method blank (signal-to-noise ratio for method blank =  $3 \pm 1$ ;  
272 signal-to-noise ratio for 0.1 ng/mL standard =  $20 \pm 12$ ). All r-squared values were greater than  
273 0.99, which ensured predictability. All replicates for all experiments had a relative standard  
274 deviation of  $<15\%$ . For all targeted analyses, the ion ratios between the primary and secondary  
275 parent-daughter transitions were consistent for all standard compounds (mean  $\pm 20\%$ ). All QC  
276 samples (high and low) were  $100\% \pm 15\%$  of the nominal values.

277 **3.2 Urine from Treated Rodents.** The urine from rodents treated for 14 days with fipronil  
278 was analyzed for biomarkers of exposure via non-targeted analysis. As described above,  
279 molecular features (significant chromatographic peaks) were extracted from analytical runs of  
280 both dosed and control animals, and The Mass Profiler software was used to isolate those  
281 features that were unique to the dosed animals. The most plausible candidate biomarkers were  
282 those compounds with the signature isotope pattern of two chlorine atoms (SI Figure 2) and/or  
283 significant negative mass defects indicative of fluorine and chlorine atoms. Seven high  
284 abundance peaks fitting these criteria were identified, and the exact monoisotopic mass of each  
285 was used to generate a ranked list of plausible formulae and corresponding structures. We  
286 tentatively assigned compound identity according to known metabolic pathways (e.g., oxidation,  
287 sulfation, glucuronidation), the retention of negative mass defect and/or the isotopic pattern  
288 associated with chlorine, and consistency with results from previous studies. Information on the  
289 seven metabolites can be found in Table 2. Four of the compounds (M1, M2, M3, M5, and M6)  
290 were identified in previous studies<sup>10, 21</sup>, whereas two more (M4 and M7) are reported for the first  
291 time in this study (Figure 1). It should be noted that the spectral feature observed for the  
292 glucuronide conjugate (M6) splits into two chromatographic peaks, most likely meaning that the

293 glucuronide molecule adds to both the oxygen and the nitrogen atom (see Figure 1). We were  
294 unable to differentiate which peak corresponded to which structure, but one was formed  
295 preferentially. However, this spectral feature is not observed for the sulfate conjugate (M5).

296 To better characterize the structures of metabolites M4 and M7, the fragmentation patterns of  
297 the parent metabolites were analyzed via LC/Q-TOF. No useful information was gained about  
298 metabolite M4; however, the fragmentation pattern of metabolite M7 helped to predict a  
299 plausible structure. M7 structural information could be gleaned from looking at the exact masses  
300 of molecular fragments originating from the parent molecule. For example, if the mass of a CO<sub>2</sub>  
301 group is observed in the fragmentation pattern, it can be assumed that the molecule likely  
302 contained a carboxylic acid. Spectral information regarding this fragmentation pattern can be  
303 found in the Supporting Information (SI Figure 3).

304 Fipronil sulfone (M1) was confirmed by an authentic standard that has the same retention time,  
305 monoisotopic mass, ion fragmentation pattern, and isotope spacing. Rats in the 5 mg/kg/day  
306 dose-group had mean concentrations of fipronil sulfone of 24.1 (SD = 18.7) ng/mL, while the 10  
307 mg/kg/day group had 31.9 (SD = 13.1) ng/mL (SI Figure 1). If the fipronil sulfone  
308 concentrations are used to generate estimated relative response factors for other metabolites that  
309 do not have standards (assuming that all respond similarly within the TOF-MS), we estimate the  
310 relative concentrations of fipronil metabolites in dosed-rodent urine to be  
311 M6>M4>M5>M3>M7>M1>M2. The estimated concentrations of M2 and M6 are 30 and 2,000  
312 ng/mL respectively.

313 **Table 2.** LC/TOF characteristics of putative metabolites in rat urine.

| Metabolite            | Retention Time (mins) | Predicted Formula of parent                                                                   | Score of Predicted Formula | [M-H] <sup>-</sup> Measured Mass (m/z) | [M-H] <sup>-</sup> Calculated Mass (m/z) | Δ ppm | Monoisotopic Mass (m/z) |
|-----------------------|-----------------------|-----------------------------------------------------------------------------------------------|----------------------------|----------------------------------------|------------------------------------------|-------|-------------------------|
| M1 (Fipronil Sulfone) | 7.57                  | C <sub>12</sub> H <sub>4</sub> Cl <sub>2</sub> F <sub>6</sub> N <sub>4</sub> O <sub>2</sub> S | 99.63                      | 450.9266                               | 450.9263                                 | 0.67  | 451.9336                |
| M2                    | 7.3                   | C <sub>9</sub> H <sub>4</sub> Cl <sub>2</sub> F <sub>3</sub> N <sub>3</sub>                   | 93.50                      | 279.9665                               | 279.9662                                 | 1.07  | 280.9734                |
| M3                    | 1.62                  | C <sub>11</sub> H <sub>4</sub> O <sub>2</sub> N <sub>4</sub> Cl <sub>2</sub> F <sub>3</sub>   | 99.53                      | 350.9667                               | 350.9669                                 | 0.43  | 351.9742                |
| M4                    | 5.38                  | C <sub>10</sub> H <sub>4</sub> Cl <sub>2</sub> F <sub>3</sub> N <sub>3</sub> O <sub>2</sub>   | 98.63                      | 323.9565                               | 323.9560                                 | 1.54  | 324.9633                |
| M5                    | 1.4                   | C <sub>11</sub> H <sub>5</sub> Cl <sub>2</sub> F <sub>3</sub> N <sub>4</sub> O <sub>4</sub> S | 99.38                      | 414.9290                               | 414.9288                                 | 0.48  | 415.9361                |
| M6                    | 1.39                  | C <sub>17</sub> H <sub>13</sub> Cl <sub>2</sub> F <sub>3</sub> N <sub>4</sub> O <sub>7</sub>  | 98.74                      | 511.0036                               | 511.0041                                 | 0.98  | 512.0113                |
| M7                    | 5.38                  | C <sub>11</sub> H <sub>3</sub> Cl <sub>2</sub> F <sub>3</sub> N <sub>4</sub> O                | 98.93                      | 332.9564                               | 332.9563                                 | 0.30  | 333.9563                |

314

315

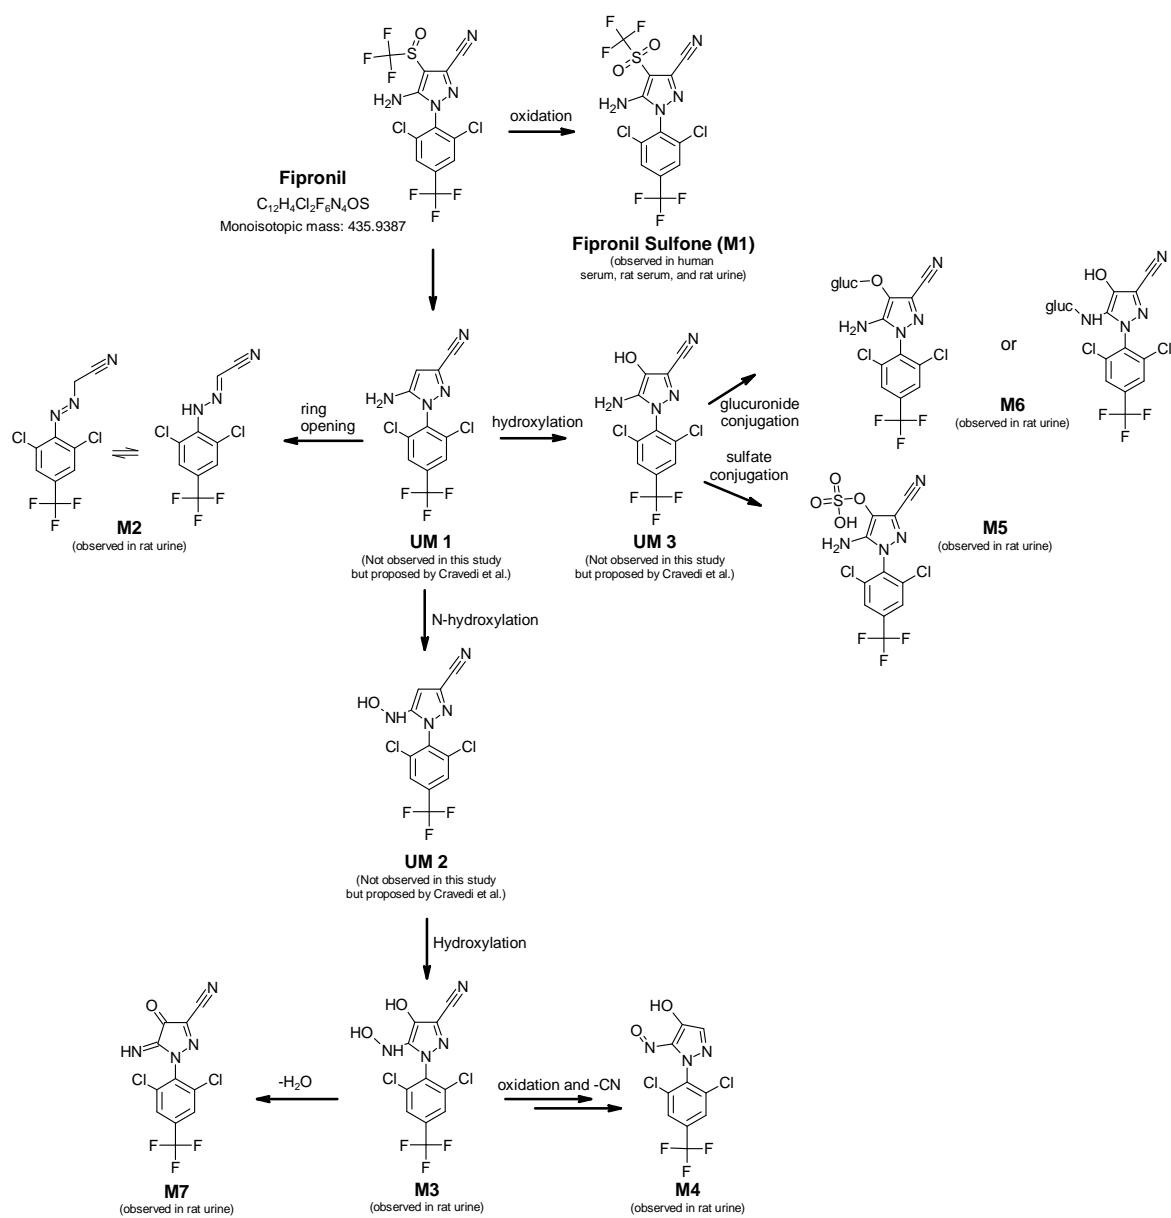

316

317  
318 **Figure 1.** Proposed metabolic pathway of fipronil in the rat. M4 and M7 are proposed structures  
319 based on MS data, isotope distributions, and exact mass. M1, M2, M3, M5, and M6 were  
320 identified in rat urine. Unobserved metabolites labeled (UM) were not identified but are likely  
321 intermediates.

322  
323 **3.3 Serum from treated rodents.** The serum from treated rats was analyzed for all suspected  
324 biological metabolites via LC-TOF to evaluate the presence of possible serum biomarkers. In our  
325 analysis we detected no additional metabolites other than small amounts of un-metabolized  
326 fipronil and fipronil sulfone which had been previously identified by several groups <sup>4, 22</sup>.  
327 Quantitative data for fipronil and fipronil sulfone in rat serum can be found in the Supporting  
328 Information.

329 **3.4 Human urine.** Urine samples ( $n=84$ ) from volunteer North Carolina residents with no  
330 known exposures to fipronil or other pesticides were examined for M1-M7 (identified in rodent  
331 urine) and for all other plausible fipronil adducts or derivatives using the methods described  
332 above. No parent fipronil or any plausible metabolites were found in the human urine samples.

333 **3.5 Human serum.** Matched human serum samples ( $n=96$ ) were analyzed for the metabolites  
334 observed in rat serum (fipronil and fipronil sulfone) by a targeted approach (LC/triple-quad,  
335 LOQ = 0.1 ng/mL). Only trace amounts of the parent fipronil were found in the human blood  
336 samples. However, fipronil sulfone (the biomarker identified in the rodent study) was detected in  
337 approximately 25% of the samples, at levels ranging from 0.1 to 3.9 ng/mL (Figure 2). Table 3  
338 describes general trends in the data in terms of detects vs. non-detects.

339  
340 **Table 3** shows the number of detects vs. non-detects for each gender and race.

| Gender           | Detects | Non-Detects | Number of Samples |
|------------------|---------|-------------|-------------------|
| Male             | 7       | 12          | 29                |
| Female           | 17      | 67          | 67                |
|                  |         |             |                   |
| Race             | Detects | Non-Detects | Number of Samples |
| Caucasian        | 22      | 39          | 61                |
| African American | 1       | 29          | 30                |
| Asian            | 1       | 2           | 3                 |
| Other            | 0       | 2           | 2                 |

341

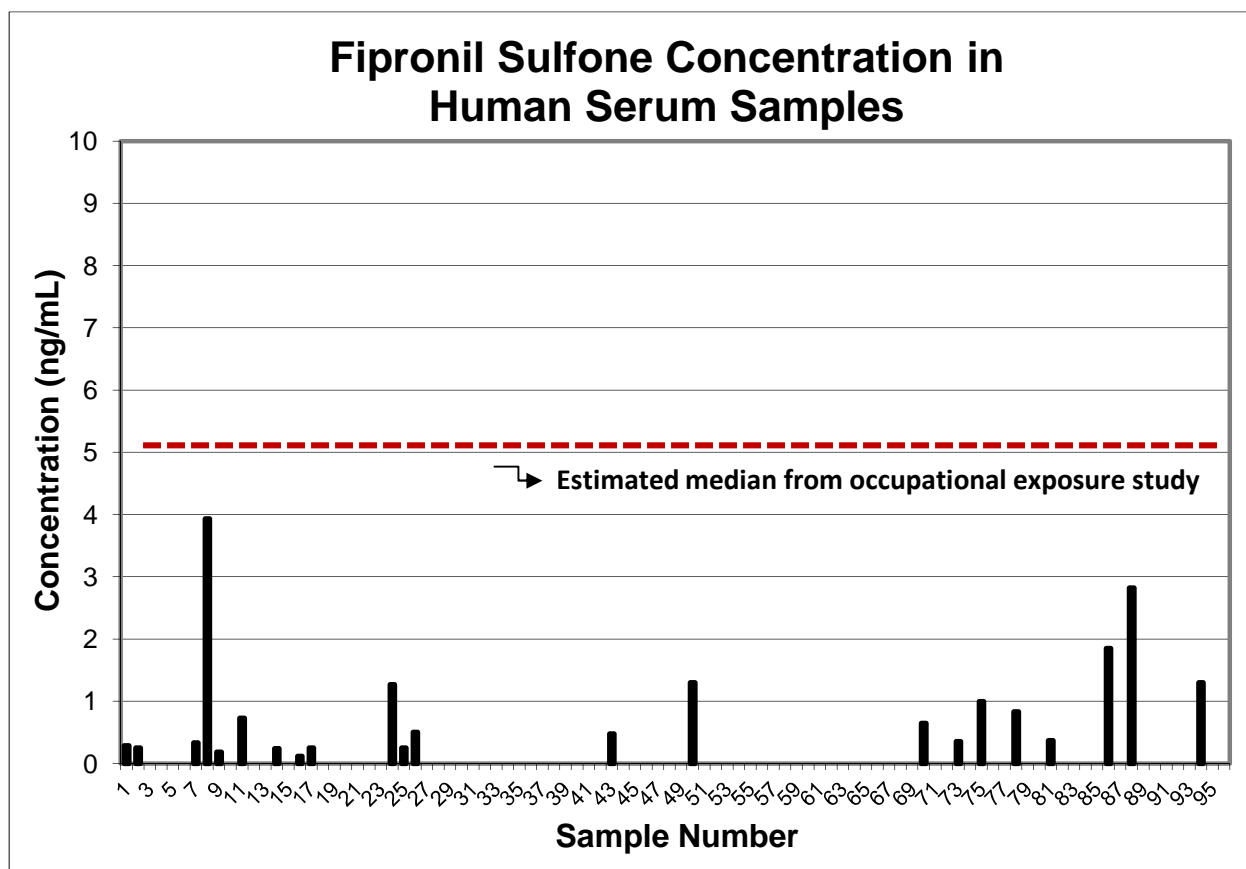

342

343 **Figure 2** shows fipronil sulfone concentrations in human serum\*. The red dotted line represents  
 344 the median calculated from an occupational exposure study<sup>17, 23</sup>.

345 \*n = 96, four samples were excluded due to insufficient volume.

346

347 4. DISCUSSION

348 This study demonstrates how advanced time-of-flight mass spectrometry techniques can be  
349 used to more fully describe the metabolism of xenobiotic compounds in treated-animal studies  
350 and how this knowledge can be applied in human biomonitoring studies to make relevant  
351 conclusions about human exposures to emerging compounds of concern. Our specific goal was  
352 to use the biomarkers identified from the dosed rodent work in the analysis of a set of human  
353 biological samples to characterize the rate of fipronil exposure in the general population.

354 In describing the metabolism of fipronil in rodents, our results were largely consistent with  
355 previous studies,<sup>10, 21, 24</sup> while also extending what is known about the basic metabolic process.  
356 Two novel metabolites observed in rat urine in this study which were not seen by Cravedi et al.  
357 (2013) can be attributed to differences in study design. Specifically, our Long Evans rats were  
358 dosed (5 or 10 mg/kg/day) for 14 days then sacrificed 6 hours after the last dose. In contrast,  
359 Cravedi et al. (2013) dosed acutely at 10 mg/kg and collected urine and serum every 24 h. over a  
360 72 h. period<sup>10</sup>. Differences between rat strain or length of dosing regimen may have made it  
361 possible to identify different products of fipronil metabolism, such as the pyrazole ring opened  
362 products or the highly oxidized heteroaromatic amine derivatives.

363 The proposed metabolic pathway in the rat and compound structures can be found in Figure 1.  
364 We propose that a new metabolite (M7) in rat urine, an imine, results from the loss of water from  
365 metabolite M3, which is a fipronil metabolite that is hydroxylated at both the carbon and the  
366 nitrogen. We also identified what is hypothesized to be nitroso compound (M4). We believe that  
367 M3 and M4 are formed from an unobserved hydroxyl amine intermediate (UM 2). The hydroxyl  
368 amine (M3) has been identified in this and in previous studies<sup>10</sup>, but to our knowledge this is the  
369 first report of a nitroso metabolite of fipronil in rat urine. Although the structure for metabolite  
370 M4 is only putative, heterocyclic aromatic amines are known to undergo biological oxidation to

371 form nitroso compounds. This process is mediated by cytochrome P-450 and NADPH<sup>25</sup>. Many  
372 heterocyclic amines are known carcinogens,<sup>26-30</sup> due to their ability to be hydroxylated and then  
373 form DNA adducts. The observation of N-hydroxylated fipronil metabolites in this and other  
374 rodent studies warrants further investigation of fipronil metabolism in humans and the resulting  
375 effects.

376 Noninvasive biomarkers like those present in urine, exhaled breath, hair, fingernails, etc. are  
377 optimal for use in human studies, and one intention of this study was to explore whether any of  
378 the urinary metabolites found in the rats could be used as biomarkers of exposure in humans.  
379 Studies with human liver microsomes have shown that fipronil is metabolized to fipronil sulfone  
380 *in vitro*, and Mohamed et al. (2004) have identified fipronil sulfone as a metabolite in humans  
381 acutely exposed to high doses<sup>9, 16</sup>. Aside from these, no publications comment on the disposition  
382 of fipronil in humans. In this study we analyzed human urine samples for any of the metabolites  
383 identified as possible biomarkers in rat urine. The absence of fipronil and its metabolites in the  
384 human urine samples was undoubtedly related to many factors. To start with, it is possible that  
385 most human elimination of these materials occurs via the feces, as is the case with rodents<sup>14, 24</sup>.  
386 Secondly, and perhaps more importantly, our study subjects were essentially volunteers from the  
387 Raleigh-Durham area of North Carolina with no known exposures to fipronil and/or any other  
388 similar pesticides. Identification of small amounts of unknown chemicals in urine from  
389 populations with no known exposure can be difficult due to the large amount of endogenous  
390 compounds found in the matrix. A more effective strategy would be to work with a group of  
391 individuals with higher exposure levels (preferably occupationally) to determine human urinary  
392 metabolites. Despite negative findings with the human urine samples, 25% of the serum samples



393 contained measureable amounts of fipronil sulfone (range 0.1 – 4 ng/mL), providing clear  
394 evidence that humans are regularly exposed to fipronil.

395 We compared our results to those from a study by Herin et al. where the serum from workers  
396 in a fipronil production facility was measured for fipronil and fipronil sulfone. The median from  
397 the occupational exposure study was calculated from the mean ( $\mu$ ) and standard deviation ( $\sigma$ )  
398 provided via a method by Pleil et al.<sup>23</sup> where the geometric mean is used to estimate the median  
399 which is equal to  $\mu/[1 + 0.5 \times (\sigma/\mu)^2]$ . Interestingly, the maximum concentration observed in this  
400 study (3.9 ng/mL) was only slightly less than the calculated median of 5.2 (GSD = 2.4) ng/mL  
401 for the occupationally exposed workers<sup>17</sup> (see Figure 2), where error is represented in terms of  
402 the geometric standard deviation (GSD).

403 The general population likely shares specific exposure routes. One of the most likely routes of  
404 exposure is contact with pets that have received applications of fipronil (i.e. Frontline® Plus) or  
405 have had contact with indoor/outdoor applications around the home. Notably, Morgan et al.  
406 (2008) concluded that family pets can act as vehicles for human exposure to the  
407 organophosphorous insecticides, such as diazinon<sup>31</sup>. Specifically, fipronil is widely used to  
408 control residential insect pests such as termites and fire ants outdoors where pets frequent,  
409 leading to transport of the material indoors. Furthermore, many flea and tick topical products  
410 contain approximately 10% fipronil and are applied directly to the skin and fur of dogs and cats,  
411 leading to human exposure to fipronil through direct contact with their pets. Dyk et al. (2012)  
412 used a fluorescent indicator to show that these fipronil residues are easily transferred from pets to  
413 humans by way of direct contact for one week following application<sup>32</sup>. According to estimates  
414 from the American Humane Association, up to 46% and 39% of US households keep dogs and  
415 cats, respectively. Use of fipronil containing products with these animals could conceivably

416 result in some measurable human exposures. Ongoing efforts in our lab (data not shown) are  
417 investigating domestic indoor sources of exposure that may be important, since local WWTP  
418 effluent is shown to contain fipronil and metabolites.

419 Although we felt the study was well-designed, it did have a few limitations. First, the fipronil  
420 sulfone metabolite may not be a specific biomarker for fipronil exposure, since it is known that it  
421 can undergo photochemical degradation<sup>2</sup> and its presence has been documented in environmental  
422 media by several reports,<sup>7, 33</sup> thus one could be exposed to either fipronil or the degradate. In  
423 addition our sample size was relatively small ( $n=100$ ). Furthermore, the number of detects was  
424 less than 30% of the total sample; which did not warrant a statistical analysis. More work is  
425 needed on a larger and more diverse sample before further conclusions can be drawn. Worth  
426 mentioning, however, was that approximately 92% of fipronil sulfone detections in human serum  
427 were from Caucasians, which represented only 63% of our samples. This result suggests that  
428 discrepancies between ethnicities may be present.

429 While the target of fipronil is insects, the two trifluoromethyl groups of fipronil may increase  
430 the compound's absorption and distribution upon accidental exposure by humans.  
431 Approximately 20-25% of drugs produced in the pharmaceutical industry contain at least one  
432 strategically incorporated fluorine atom (usually in the form of either one fluorine atom or a  
433 trifluoromethyl group) because fluorine can significantly impact lipophilicity and improve the  
434 bioavailability of orally administered drugs. Several studies have shown that the addition of  
435 fluorine, the most electronegative element, can decrease the pKa and therefore basicity of  
436 surrounding functional groups<sup>34, 35</sup>. Although the effect is not always predictable, this decreased  
437 basicity stabilized molecules in the harsh acidic conditions of the stomach and increases  
438 bioavailability<sup>36, 37</sup>. Another factor that affects the absorption and distribution of a molecule is

439 lipophilicity. Compounds usually enter into cell membranes via passive transport (although  
440 active transport is an alternate mechanism). Passive transport requires that the molecule is able to  
441 permeate the cell membrane, but also avoid entrapment by the lipid bilayer. The electron  
442 withdrawing capabilities of fluorine can, in some cases, be incorporated to tune a compound's  
443 lipophilicity and ease passive transport into cells<sup>38-40</sup>. Fipronil's presence in human serum  
444 demonstrated that the chemical is, in fact, absorbed by humans. Further, Hainzl et. al (1996)  
445 found that fipronil lost almost all activity in neurotoxicity studies on mice without the  
446 trifluoromethylsulfinyl functional group.<sup>2</sup> Metabolites of fipronil have also been found in many  
447 rat tissues, including brain cells<sup>2, 4, 10</sup>, demonstrating that even highly selective membranes are  
448 somewhat permeable to these chemicals. The fluorinated functional groups may increase  
449 fipronil's potency as an insecticide; however, they may also increase absorption and distribution  
450 of the potentially toxic compound in non-target organisms, such as humans. Considering that  
451 fipronil has been associated with endocrine disruption, neurotoxicity, and carcinogenicity<sup>12-15</sup>,  
452 accidental exposure and increased bioavailability may be problematic.

453 In conclusion, previously reported metabolites in rat urine and serum were confirmed, and two  
454 novel urinary metabolites have been proposed. The putative biomarkers determined in the rodent  
455 study were used in human serum analysis, where fipronil sulfone was found in approximately  
456 25% of serum samples from a convenient sample of North Carolina residents. Serum fipronil  
457 levels in our study suggest that environmental exposures to fipronil may be common, but likely  
458 lower than occupational exposures. Matched urine was also analyzed, but no fipronil or any of  
459 its metabolites were identified, which suggests that urine may not be an appropriate matrix for  
460 biomonitoring populations with no known exposure to fipronil. More extensive characterization  
461 of the metabolites produced in humans exposed to higher levels of fipronil, as well as the effects

462 from low but chronic exposure to fipronil is needed. Further investigations are also necessary to  
463 describe the sources of fipronil exposure and identify rates of exposure in other populations.

464

465

## 466 5. SUPPORTING INFORMATION

467 **5.1 Rodents** were housed in polycarbonate cages containing heat-treated hardwood chip  
468 bedding. Access to food (Purina 5008 Chow; Lab Diet/PMI Nutrition International, Richmond,  
469 IN) and tap water was provided *ad libitum*. Animals were allowed to acclimate to their  
470 surroundings in the animal colony for 5-7 days before beginning any tests. The animal colony  
471 was maintained at a temperature of  $22 \pm 2$  °C, with humidity at  $40 \pm 20\%$ , and a 12:12 hr  
472 light:dark cycle (light on at 6:00 a.m.).

473 **5.2 Recovery Experiment for Fipronil in Dosed-rat Serum.** Standard fipronil (200 ng) was  
474 added to a vial containing blank rat serum (100  $\mu$ L), along with 100  $\mu$ L of 0.1 M formic acid and  
475 1 mL of cold acetonitrile. The solution was centrifuged at  $12,500 \times g$ , and the supernatant was  
476 extracted. In a separate vial, blank rat serum was directly spiked with fipronil standard (200 ng).  
477 Both the supernatant and the control sample were mixed 50:50 with 10 mM ammonium acetate  
478 buffer and analyzed via LC/triple-quad. The fipronil recovery rate was 98%.

479 **5.3 Recovery Experiment for Fipronil in Spiked Human Serum.** A standard mix of fipronil  
480 metabolites (10 ng each metabolite) was added to a vial containing blank calf serum (200  $\mu$ L),  
481 along with 25  $\mu$ L of a 0.1 M formic/internal standard solution (fipronil des-F<sub>3</sub>, 10 ng) and 2 mL  
482 of acetonitrile. The solution was centrifuged at  $12,500 \times g$  and was extracted onto an Oasis 3cc  
483 HLB solid phase extraction cartridge. The solid phase extraction method consisted of

484 conditioning the cartridge with 3 mL of methanol followed by 3 mL of DI water; loading the  
485 sample; washing with 3 mL of 95:5 water:acetonitrile; and eluting with 3 mL of acetonitrile. The  
486 samples were evaporated under N<sub>2</sub> at 40 °C until 200 µL remained. In a separate vial (the control  
487 sample), only 200 µL of blank calf serum, 25 µL of the 0.1 M formic acid/internal standard  
488 solution and 2 mL of acetonitrile was added (no fipronil or metabolites), and this vial was also  
489 carried through the procedure, just as the experimental sample. The control sample was spiked  
490 with the standard mix of fipronil metabolites (10 ng/metabolite) after evaporation. All the  
491 samples were prepared 50:50 with 10 mM ammonium acetate buffer, and analyzed via LC/triple-  
492 quad (*n*=3). The results are shown below in SI Table 1.

493

494

495

496 **SI Table 1.** Human serum recovery experiment results.

| Compound            | Average % Recovery (± %RSD) |
|---------------------|-----------------------------|
| Fipronil            | 82 ±2.4                     |
| Fipronil sulfone    | 83 ±3.6                     |
| Fipronil sulfide    | 84 ±3.6                     |
| Fipronil amide      | 82 ±7.3                     |
| Monochloro fipronil | 85 ±3.5                     |

497

498

499 **5.4 Recovery Experiment for Fipronil in Spiked Human Urine.** A standard mix of fipronil  
500 metabolites (400 ng/metabolite) was added to a vial containing 10 mL of blank human urine and  
501 1 mL of acetonitrile/internal standard solution (fipronil des-F<sub>3</sub>, 33 ng). The solution was  
502 extracted onto an Oasis 6cc HLB solid phase extraction cartridge. The solid phase extraction  
503 method was the same as for human serum, except the elution step used 5 mL instead of 3 mL of  
504 acetonitrile. The solution was evaporated under N<sub>2</sub> at 40 °C until 1 mL remained. In the control

505 sample, 10 mL of blank human urine and 1 mL acetonitrile were added (no fipronil or  
506 metabolites), and this vial was also carried through the procedure, just as the experimental  
507 samples. After evaporation the control sample was spiked with the standard fipronil metabolite  
508 mixture (400 ng/metabolite). All samples were prepared 50:50 with 10 mM ammonium acetate  
509 buffer and analyzed via LC/triple-quad ( $n=3$ ). The results are shown below in SI Table 2.

510 **SI Table 2.** Human urine recovery experiment results.

| Compound            | Average % Recovery ( $\pm$ %RSD) |
|---------------------|----------------------------------|
| Fipronil            | 103 $\pm$ 5.8                    |
| Fipronil sulfone    | 100 $\pm$ 10                     |
| Fipronil sulfide    | 99 $\pm$ 7.0                     |
| Fipronil amide      | 104 $\pm$ 3.8                    |
| Monochloro fipronil | 101 $\pm$ 5.0                    |

511

512 **5.5 Quantitation of fipronil and fipronil sulfone in the serum of treated rodents.** Rat serum  
513 (25  $\mu$ L) was denatured with 100  $\mu$ L of 0.1 M formic acid and precipitated with 1 mL of a cold  
514 acetonitrile solution spiked with the internal standard (fipronil des-F<sub>3</sub>, 25 ng). The sample was  
515 then centrifuged for 5 minutes at 12500  $\times$  g. An aliquot of the supernatant was mixed 50:50 with  
516 10 mM ammonium acetate buffer, and analyzed via LC/TOF and LC/triple-quad.  $n=9$  for highest  
517 dose (10 mg/kg/day) ;  $n=10$  for lowest dose (5 mg/kg/day); and  $n=11$  for control animals, which  
518 were treated with vehicle. To determine the concentration of compounds of interest, a nine-point  
519 matrix-matched extracted standard curve from 10-5000 ng/mL, a method blank (DI water), and a  
520 matrix blank (blank rat serum) was run with the rat serum samples via LC/triple-quad. The  
521 lowest value on the standard curve (10 ng/mL) was considered the lower limit of quantitation  
522 (LLOQ). The results of the quantitation are shown in SI Table 3.

523

524 **SI Table 3.** Mean, standard deviation, and 95% confidence interval for fipronil and fipronil  
525 sulfone in rat serum.

| Compound | Dose Conc. (mg/kg bw) | LOQ (ng/mL) | Mean (ng/mL) | St. Dev. | 95% Conf. Int. |
|----------|-----------------------|-------------|--------------|----------|----------------|
| Fipronil | control               | 10          | 1.0 (<LLOQ)  | 3.0      | 1.8            |
| Sulfone  | control               | 10          | 2.5 (<LLOQ)  | 3.7      | 2.2            |
| Fipronil | 5                     | 10          | 8.9 (<LLOQ)  | 3.4      | 2.1            |
| Sulfone  | 5                     | 10          | 2424         | 193.3    | 119.8          |
| Fipronil | 10                    | 10          | 13.9         | 7.8      | 5.1            |
| Sulfone  | 10                    | 10          | 3548         | 511.9    | 334.4          |

526

527

528

529

530

531 **5.6 Quantitation of fipronil sulfone in the urine of treated rodents.** Rat urine (100  $\mu$ L) was  
532 treated with 900  $\mu$ L of cold acetonitrile. The sample was then centrifuged for 8 minutes at  
533 12,500  $\times g$ , prepared 50:50 with 10mM ammonium acetate buffer, and analyzed via LC/triple-  
534 quad.  $n = 2$  for highest dose (10 mg/kg/day);  $n = 4$  for lowest dose (5 mg/kg/day); and  $n = 6$  for  
535 control animals. In order to determine concentration of compounds of interest, a seven-point  
536 extracted standard curve prepared in DI water from 10-5000 ng/mL, along with a method blank  
537 (DI water) was run with the experimental rat urine samples. SI Figure 1 shows median fipronil  
538 sulfone concentrations for rodents dosed with fipronil. The highest dose group had a mean  
539 concentration of 31.9 (SD = 13.1) ng/mL fipronil sulfone, while the lowest dose group had 24.1  
540 (SD = 18.7) ng/mL and the control animals had mean concentrations below the LLOQ.

541 The LC/triple quad used for the quantitation of fipronil sulfone was a Waters Acquity  
542 ultraperformance liquid chromatography system coupled with a Waters Quatro Premier XE triple

543 quadrupole mass spectrometer (UPLC-MS/MS; Waters Corporation). A 20- $\mu$ L aliquot of each  
544 sample was injected onto an Acquity UPLC BEH C18 column (1.7  $\mu$ m, 2.1  $\times$  50 mm; Waters  
545 Corporation) that was maintained at 50  $^{\circ}$ C. The mobile phase consisted of solvent A: 2 mM  
546 ammonium acetate buffer with 5% methanol and solvent B: acetonitrile at a flow rate of 400  
547  $\mu$ L/min, starting with 75% solvent A for 30 s and then increasing to 90% solvent B at 3.5 min  
548 and 100% solvent B at 3.6 min and held for 0.9 min. At 4.6 min the gradient was returned to  
549 60% solvent A and held until 6.0 min. Electrospray negative ionization was used in the mass  
550 spectrometer source. The capillary voltage was set at negative 0.4 kV, and the source  
551 temperature was 150  $^{\circ}$ C. The primary transition used for quantitation was 451.2 - 244.0  $m/z$ , and  
552 two other transitions were monitored for confirmation, 451.2 to 281.9  $m/z$  and 451.2 to 414.9  
553  $m/z$ .

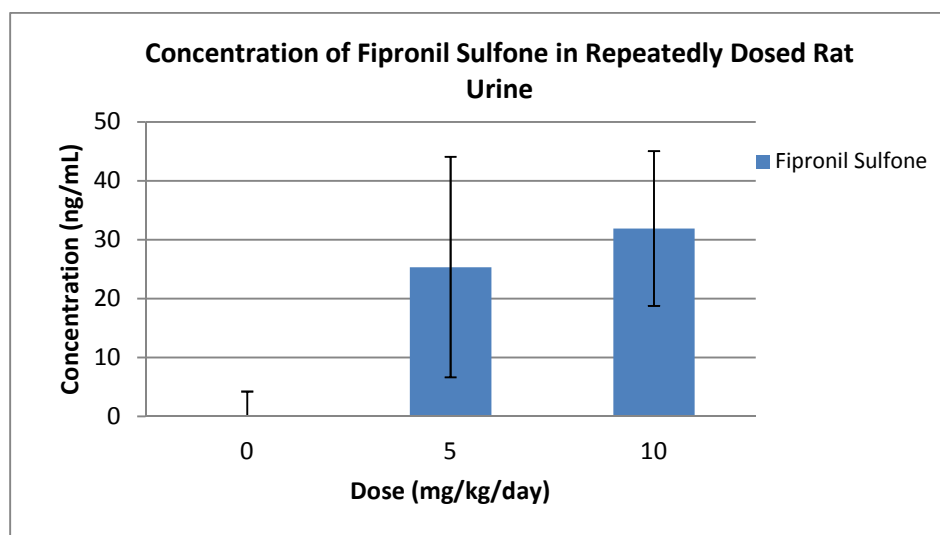

554

555 **SI Figure 1.** Median fipronil sulfone concentration in rat urine.

556

557



558

559

## 560 5.7 Time-of-flight mass spectrometry scoring and isotope patterns.

561

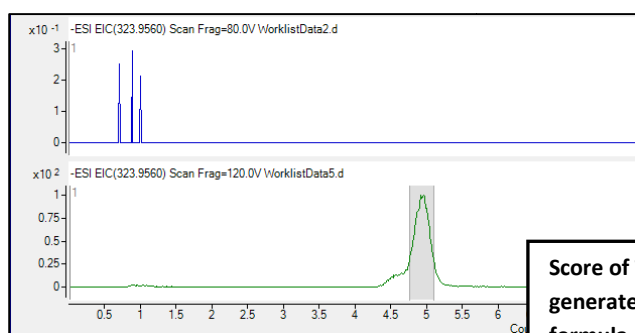

Score of TOF-generated molecular formula.

562

| Best | DBE | Formula             | Score    |
|------|-----|---------------------|----------|
| 8    |     | C10 H4 Cl2 F3 N3 O2 | 99.46    |
|      |     |                     | 324.9633 |
|      |     |                     | 324.9633 |

563

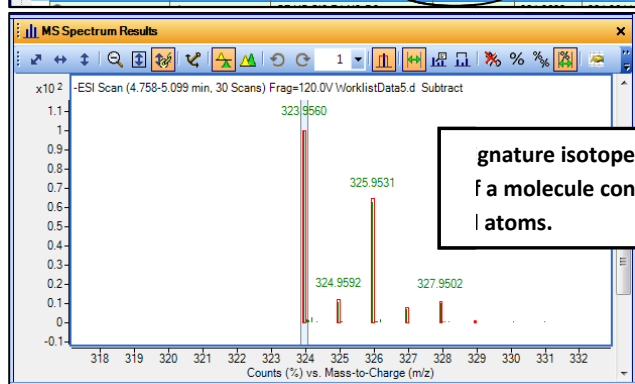

Signature isotope pattern of a molecule containing 2 chlorine atoms.

564

565 **SI Figure 2** shows the spectral pattern of a molecule containing 2 chlorine atoms. Note that  
566 323.9560  $m/z$  is the most abundant isotope, 325.9531  $m/z$  contains one <sup>37</sup>Cl, and 327.9502  $m/z$   
567 contains two <sup>37</sup>Cl. The 324.9592  $m/z$  contains one <sup>13</sup>C. The numerical ranking for formula  
568 generated for compound (M4) is shown. The top extracted ion chromatograph (Worklist Data 2)  
569 shows a control animal sample and the absence of a peak for M4.

570

571

572

573

### 574 5.8 Metabolite M7 in rat urine

575

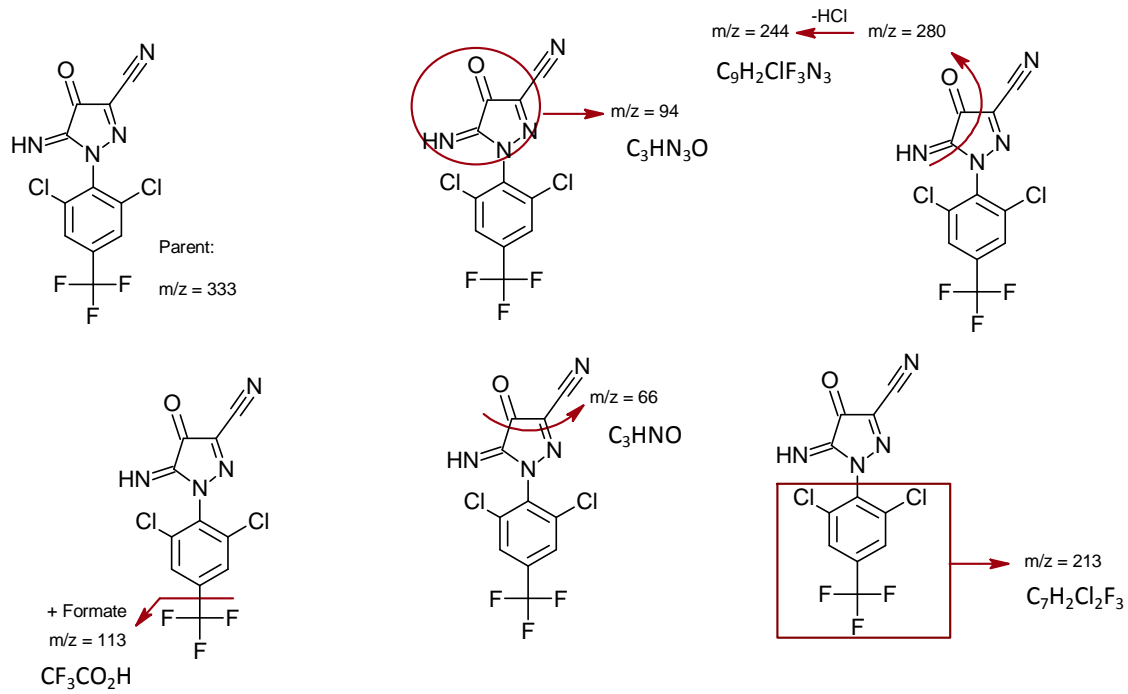

576  
577

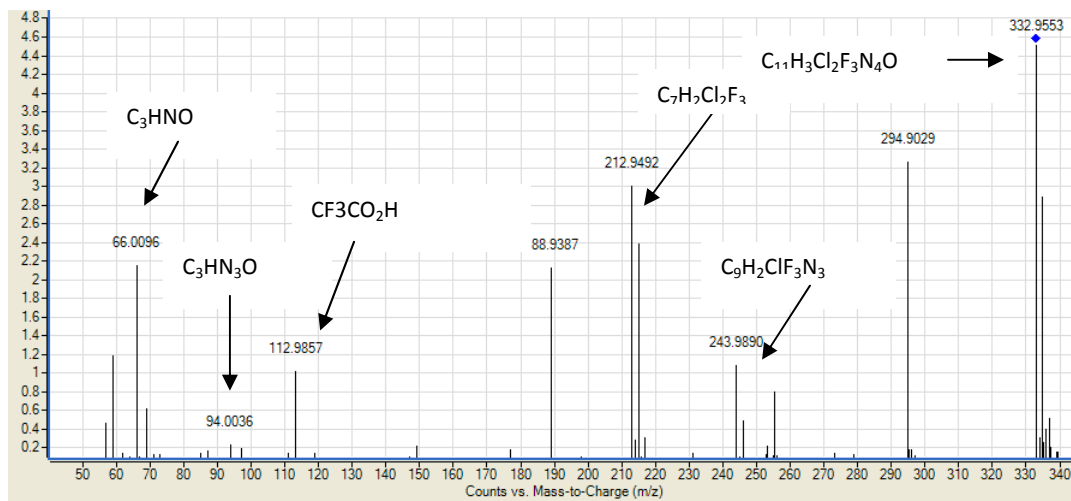

578

579 **SI Figure 3** shows the fragmentation pattern of Metabolite M7 in the LC/Q-TOF. The red  
580 circles/boxes show the fragment and the spectrum at the bottom shows the peaks corresponding  
581 to the fragments.

582 **5.9 Transitions in LC/triple quad method.** SI Table 6 below lists the parent to daughter  
583 transitions which were monitored in the Agilent 1100 LC/triple quad method.

584 **SI Table 6.** LC/triple quad parent-daughter transitions.

| Compound            | Transition | Parent | Daughter |
|---------------------|------------|--------|----------|
| Fipronil            | 1°         | 434.9  | 329.8    |
| Fipronil            | 2°         | 434.9  | 249.9    |
| Fipronil            | 3°         | 434.9  | 277.8    |
| Fipronil sulfone    | 1°         | 451.1  | 415.0    |
| Fipronil sulfone    | 2°         | 451.1  | 281.9    |
| Fipronil sulfone    | 3°         | 451.1  | 243.9    |
| Fipronil sulfide    | 1°         | 418.9  | 382.8    |
| Fipronil sulfide    | 2°         | 418.9  | 261.7    |
| Fipronil sulfide    | 3°         | 418.9  | 313.8    |
| Fipronil amide      | 1°         | 452.9  | 347.7    |
| Fipronil amide      | 2°         | 452.9  | 303.8    |
| Fipronil amide      | 3°         | 452.9  | 271.9    |
| Monochloro fipronil | 1°         | 401.1  | 283.9    |
| Monochloro fipronil | 2°         | 401.1  | 295.9    |
| Monochloro fipronil | 3°         | 401.1  | 331.9    |
| Fipronil des F3     | 1°         | 387.2  | 281.9    |
| Fipronil des F3     | 2°         | 387.2  | 331.0    |
| Fipronil des F3     | 3°         | 387.2  | 351.0    |

585

586

587

588

589

590

591

592

593 **5.10 SI Figure 6** shows fipronil des-F<sub>3</sub> which was used as an internal standard for analytical  
594 methods due to its similarity in structure to fipronil. The structure is shown below.

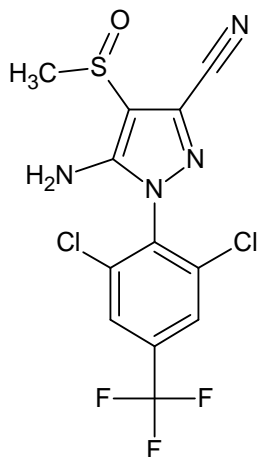

595

596

597 Molecular Formula: C<sub>12</sub>H<sub>7</sub>Cl<sub>2</sub>F<sub>3</sub>N<sub>4</sub>OS

598 Monoisotopic Mass: 381.966971 Da

599 [M-H]<sup>-</sup>: 380.959694 Da

600

#### 601 AUTHOR CONTRIBUTIONS

602 The manuscript was written through equal contributions of all authors. All authors have given

603 approval to the final version of the manuscript.

#### 604 ACKNOWLEDGMENTS

605 This research was supported by an appointment to the Research Participation Program at the

606 National Exposure Research Laboratory administered by the Oak Ridge Institute for Science

607 Education through an interagency agreement between the U.S. Department of Energy and the

608 U.S. Environmental Protection Agency. We thank Agilent Technologies for providing us with

609 the LC/TOF mass spectrometer that was used to investigate metabolic products. We also thank  
610 Michael Hays of US EPA who kindly allowed the use of his LC/Q-TOF mass spectrometer for  
611 further structure elucidation, Benny Pyke of Arizona State University for discussions on  
612 detection of fipronil in human urine, and Matthew Stiegel, Jon Sobus, and Peter Egeghy for help  
613 with data analysis.

614

#### 615 DISCLAIMER

616 This article will be reviewed in accordance with the policy of the National Exposure Research  
617 Laboratory, U.S. Environmental Protection Agency, and approved for publication. Approval  
618 does not signify that the contents necessarily reflect the view and policies of the Agency, nor  
619 does mention of trade names or commercial products constitute endorsement or recommendation  
620 for use.

621

#### 622 REFERENCES

623

- 624 1. Brassard, D.; Haddad, S.; Hill, E., US EPA BEAD Chemical Profile for Registration  
625 Review: Fipronil (PC Code: 129121). In 2011.
- 626 2. Hainzl, D.; Casida, J. E., Fipronil insecticide: Novel photochemical desulfinylation with  
627 retention of neurotoxicity. *Proceedings of the National Academy of Sciences* **1996**, *93*, 12764-  
628 12767.
- 629 3. Ikeda, T.; Nagata, K.; Kono, Y.; Yeh, J. Z.; Narahashi, T., Fipronil modulation of  
630 GABAA receptor single-channel currents. *Pest Management Science* **2004**, *60*, (5), 487-492.
- 631 4. Hainzl, D.; Cole, L. M.; Casida, J. E., Mechanisms for Selective Toxicity of Fipronil  
632 Insecticide and Its Sulfone Metabolite and Desulfinyl Photoproduct. *Chemical Research in*  
633 *Toxicology* **1998**, *11*, 1529-1535.
- 634 5. Rhône-Poulenc Agro to boost fipronil production. *Agrow* **1997**, *294*, 17.

- 635 6. *Trends in Concentrations of Pesticides in Urban Streams in the United States, 1992-*  
636 *2008*; USGS.
- 637 7. Gunasekara, A. S.; Truong, T.; Goh, K. S.; Spurlock, F.; Tjeerderma, R. S.,  
638 Environmental fate and toxicology of fipronil. *Journal of Pesticide Science* **2007**, *32*, 189-199.
- 639 8. Erickson, B. E., Europe to ban fipronil pesticide to protect bees. *Chemical & Engineering*  
640 *News Archive* **2013**, *91*, (29), 21.
- 641 9. Mohamed, F.; Senarathna, L.; Percy, A.; Abeyewardene, M.; Eaglesham, G.; Cheng, R.;  
642 Azher, S.; Hittarage, A.; Dissanayake, W.; Sheriff, M. H.; Davies, W.; Buckley, N. A.; M., E.,  
643 Acute human self-poisoning with the N-phenylpyrazole insecticide fipronil--a GABAA-gated  
644 chloride channel blocker. *Journal of Toxicology. Clinical Toxicology* **2004**, *42*, 955-963.
- 645 10. Cravedi, J. P.; Delous, G.; Zalko, D.; Viguie, C.; Debrauwer, L., Disposition of fipronil in  
646 rats. *Chemosphere* **2013**, *93*, 2275-2283.
- 647 11. Tingle, C. C. D.; Rother, J. A.; Dewhurst, C. F.; Lauer, S.; King, W. J., Fipronil:  
648 Environmental Fate, Ecotoxicology, and Human Health Concerns. *Reviews of Environmental*  
649 *Contamination and Toxicology* **2003**, *176*, 1-66.
- 650 12. Ohi, M.; Dalsenter, P. R.; Andrade, A. J. M.; Nascimento, A. J., Reproductive adverse  
651 effects of fipronil in Wistar rats. *Toxicology Letters* **2004**, *146*, (2), 121-127.
- 652 13. Raquel, P.; Tercariol, G.; Godinho, A. F., Behavioral effects of acute exposure to the  
653 insecticide fipronil. *Pesticide Biochemistry and Physiology* **2011**, *99*, 221-225.
- 654 14. *New Pesticide Fact Sheet for Fipronil*; US EPA: 1996.
- 655 15. Vidau, C.; Gonzalez-Polo, R. A.; Niso-Santano, M.; Gomez-Sanchez, R.; Bravo-San  
656 Pedro, J. M.; Pizarro-Estrella, E.; Blasco, R.; Brunet, J. L.; Belzunces, L. P.; Fuentes, J. M.; ,  
657 Fipronil is a powerful uncoupler of oxidative phosphorylation that triggers apoptosis in human  
658 neuronal cell line SHSY5Y. *NeuroToxicology* **2011**, *32*, 935-943.
- 659 16. Tang, J. A.; Usmani, K.; Hodgson, E.; Rose, R. L., In vitro metabolism of fipronil by  
660 human and rat cytochrome P450 and its interactions with testosterone and diazepam. *Chemico-*  
661 *Biological Interactions* **2004**, *147*, (3), 319-329.
- 662 17. Herin, F.; Boutet-Robinet, E.; Levant, A.; Dulaurent, S.; Manika, M.; Galatry-Bouju, F.;  
663 Caron, P.; Soulat, J.-M., Thyroid function tests in persons with occupational exposure to fipronil.  
664 *Thyroid* **2011**, *21*.
- 665 18. Freeborn, D. L.; McDaniel, K. L.; Moser, V. C.; Herr, D. W., Use of  
666 electroencephalography (EEG) to assess CNS changes produced by pesticides with different  
667 modes of action: effects of permethrin, deltamethrin, fipronil, imidacloprid, carbaryl, and  
668 triadimefon. *Toxicology and Applied Pharmacology*, (doi:10.1016/j.taap.2014.11.011), in press.

- 669 19. Moser, V. C.; Stewart, N.; Lyke, D. F.; Crooks, J.; MacMillan, D. K.; Hedge, J. M.;  
670 Wood, C. E.; McMahan, R. L.; Strynar, M. J.; Herr, D. W., Assessment of serum biomarkers in  
671 rats after exposure to pesticides of different chemical classes. *Toxicology and Applied*  
672 *Pharmacology*, (doi:10.1016/j.taap.2014.11.016), in press.
- 673 20. Xie, T.; Liang, Y.; A, J.; Hao, H.; Liu, L.; Zheng, X.; Dai, C.; Zhou, Y.; Guan, T.; Liu,  
674 Y.; Xie, L.; Wang, G., Post acquisition data processing techniques for lipid analysis by  
675 quadrupole time-of-flight mass spectrometry. *Journal of Chromatography B* **2012**, *905*, (0), 43-  
676 53.
- 677 21. In *Pesticide Residues in Food. Fipronil: Residue Evaluation 2001.*, Joint Meeting on  
678 Pesticide Residues in Food
- 679 22. Lacroix, M. Z.; Puel, S.; Toutain, P. L.; Viguie, C., Quantification of fipronil and its  
680 metabolite fipronil sulfone in rat plasma over a wide range of concentrations by LC/UV/MS.  
681 *Journal of Chromatography B* **2010**, *878*, 1934-1938.
- 682 23. Pleil, J. D.; Sobus, J. R.; Stiegel, M. A.; Hu, D.; Oliver, K. D.; Olenick, C.; Strynar, M.  
683 J.; Clark, M.; Madden, M. C.; Funk, W. E., Estimating Common Parameters of Lognormally  
684 Distributed Environmental and Biomonitoring Data: Harmonizing Disparate Statistics From  
685 Publications. *Journal of Toxicology and Environmental Health, Part B* **2014**, *17*, 341-368.
- 686 24. In *Pesticide Residues in Food. Fipronil: Residue evaluation 1997.*, Joint Meeting on  
687 Pesticide Residues in Food.
- 688 25. Kim, D.; Guengerich, F. P., CYTOCHROME P450 ACTIVATION OF ARYLAMINES  
689 AND HETEROCYCLIC AMINES. *Annual Reviews in Pharmacology and Toxicology* **2005**, *45*,  
690 27-49.
- 691 26. Snyderwine, E. G.; Turesky, R. J.; Turteltaub, K. W.; Davis, C. D.; Sadrieh, N.; Schut, H.  
692 A. J.; Nagao, M.; Sugimura, T.; Thorgeirsson, U. P.; Adamson, R. H.; Thorgeirsson, S. S.,  
693 Metabolism of food-derived heterocyclic amines in nonhuman primates. *Mutation*  
694 *Research/Fundamental and Molecular Mechanisms of Mutagenesis* **1997**, *376*, (1-2), 203-210.
- 695 27. Eisenbrand, G.; Tang, W., Food-borne heterocyclic amines. Chemistry, formation,  
696 occurrence, and biological activities. A literature review. *Toxicology* **1993**, *12*, 1-82.
- 697 28. Pezdirc, M.; Zegura, B.; Filipic, M., Genotoxicity and induction of DNA damage  
698 responsive genes by food-borne heterocyclic aromatic amines in human hepatoma HepG2 cells.  
699 *Food Chem. Toxicol.* **2013**, *59*, 386-394.
- 700 29. Nagao, M.; Sugimura, T., Carcinogenic factors in food with relevance to colon cancer  
701 development. *Mutation Research/Fundamental and Molecular Mechanisms of Mutagenesis*  
702 **1993**, *290*, (1), 43-51.
- 703 30. Schut, H. A. J.; Snyderwine, E. G., DNA adducts of heterocyclic amine food mutagens:  
704 implications for mutagenesis and carcinogenesis. *Carcinogenesis* **1999**, *20*, (3), 353-368.

- 705 31. Morgan, M. K.; Stout, D. M.; Jones, P. A.; Barr, D. B., An observational study of the  
706 potential for human exposures to pet-borne diazinon residues following lawn applications.  
707 *Environmental Research* **2008**, *107*, 336-342.
- 708 32. Dyk, M. B.; Liu, Y.; Chen, Z.; Vega, H.; Krieger, R. I., Fate and distribution of fipronil  
709 on companion animals and in their indoor residences following spot-on flea treatments. *Journal*  
710 *of Environmental Science and Health, Part B* **2012**, *47*, 913-924.
- 711 33. Ensminger, M.; Budd, R.; Kelley, K.; Goh, K., Pesticide occurrence and aquatic  
712 benchmark exceedances in urban surface waters and sediments in three urban areas of California,  
713 USA, 2008–2011. *Environ Monit Assess* **2013**, *185*, (5), 3697-3710.
- 714 34. van Niel, M. B.; Collins, I.; Beer, M. S.; Broughton, H. B.; Cheng, S. K. F.; Goodacre, S.  
715 C.; Heald, A.; Locker, K. L.; MacLeod, A. M.; Morrison, D.; Moyes, C. R.; O'Connor, D.; Pike,  
716 A.; Rowley, M.; Russell, M. G. N.; Moyes, C. R.; O'Connor, D.; Pike, A.; Rowley, M.; Russell,  
717 M. G. N.; Sohal, B.; Stanton, J. A.; Thomas, S.; Verrier, H.; Watt, A. P.; Castro, J. L.,  
718 Fluorination of 3-(3-(piperidin-1-yl)propyl)indoles and 3-(3-(piperazin-1-yl)propyl)indoles gives  
719 selective human 5-HT1D receptor ligands with improved pharmacokinetic profiles. *Journal of*  
720 *Medicinal Chemistry* **1999**, *42*, (12), 2087-2104.
- 721 35. Rowley, M.; Hallett, D. J.; Goodacre, S.; Moyes, C.; Crawforth, J.; Sparey, T. J.; Patel,  
722 S.; Marwood, R.; Patel, S.; Thomas, S.; Hitzel, L.; O'Connor, D.; Szeto, N.; Castro, J. L.;  
723 Hutson, P. H.; MacLeod, A. M., 3-(4-fluoropiperidin-3-yl)-2-phenylindoles as high affinity,  
724 selective, and orally bioavailable h5-HT2A receptor antagonist. *Journal of Medicinal Chemistry*  
725 **2001**, *44*, (10), 1603-1614.
- 726 36. Chambers, R. D., *Fluorine in Organic Chemistry*. Blackwell Publishing: Oxford, 2000.
- 727 37. Morgenthaler, M.; Schweizer, E.; Hoffmann-Ro, A.; Martin, R. E.; Jaeschke, G.;  
728 Wagner, B.; Fischer, H.; Bendels, S.; Zimmerli, D.; Schneider, J.; Diederich, F.; M., K.; Mu, K.,  
729 Predicting properties and tuning physicochemical in lead optimization: Amine basicities.  
730 *ChemMedChem* **2007**, *2*, 1100.
- 731 38. Purser, S.; Moore, P. R.; Swallow, S.; Gouverneur, V., Fluorine in medicinal chemistry.  
732 *Chemical Society Reviews* **2008**, *37*, (2), 320-330.
- 733 39. Smart, B. E., Fluorine Substituent Effects (on bioactivity). *Journal of Fluorine Chemistry*  
734 **2001**, *109*, (1), 3-11.
- 735 40. Smith, D. A.; van de Waterbeemd, H.; Walker, D. K., Methods and Principles in  
736 Medicinal Chemistry, vol 31: Pharmacokinetics and Metabolism in Drug Design. *Wiley-VCH*  
737 **2006**, *31*.

738



Highlights for: Identification of fipronil metabolites by time-of-flight mass spectrometry for application in a human exposure study

- A fipronil dosed-rodent study was used for metabolite discovery in urine and serum
- Time-of-flight mass spectrometry was used for metabolite identification
- Identified metabolites were analyzed in 100 human serum and urine samples
- This is the first study to identify these biomarkers of fipronil in a general population
- Results showed 25% of human serum samples contained a fipronil metabolite
